# Supplementary material for: Genome-wide analysis of DNA Methylation profiles on sheep ovaries associated with prolificacy using whole-genome Bisulfite sequencing
Source: BMC Genomics. 2017 Oct 2;18:759. doi: 10.1186/s12864-017-4068-9 (PMC5625832; doi:10.1186/s12864-017-4068-9)
Supplement: Supplementary file 5 — Information of DMRs in HP and LP. methChr: the chromosome the DMR is located. start: the start site of the DMR island in the chromosome. end: the end site of the DMR in the chromosome. width: the length of the DMR. methDif: the different levels of DMR between the LP and the HP groups. Annotation: the type of DMR in gene functional elements. geneStrand: + is the sense strand, - is the antisense strand. methType: the methylation type of the DMR. geneId: the gene number which the DMR is related. (XLSX 4 mb). [file 12864_2017_4068_MOESM5_ESM.xlsx]

## Sheet: DMR.gene
methChr	start	end	width	methDif	annotation	geneStrand	methType	geneId
12	74369711	74369728	18	-0.952	Promoter (2-3kb)	+	CG	ENSOARG00000015257
14	9182359	9182369	11	-0.926	Intron (ENSOART00000010416/ENSOARG00000009566, intron 4 of 12)	-	CG	ENSOARG00000009646
13	11413417	11413442	26	-0.862	Distal Intergenic	-	CG	ENSOARG00000013446
2	187571403	187571425	23	-0.855	Distal Intergenic	+	CG	ENSOARG00000013477
15	60682379	60682389	11	-0.854	Intron (ENSOART00000017488/ENSOARG00000016057, intron 9 of 9)	-	CG	ENSOARG00000016191
23	19098625	19098824	200	-0.847	Distal Intergenic	+	CG	ENSOARG00000005276
1	266556055	266556309	255	-0.845	Intron (ENSOART00000015142/ENSOARG00000013878, intron 8 of 35)	+	CG	ENSOARG00000013878
14	5829517	5829527	11	-0.843	Distal Intergenic	-	CG	ENSOARG00000008034
7	51811718	51811741	24	-0.837	Distal Intergenic	+	CG	ENSOARG00000020895
1	198551758	198551903	146	-0.83	Distal Intergenic	-	CG	ENSOARG00000020509
17	62691780	62691790	11	-0.83	Intron (ENSOART00000014399/ENSOARG00000013244, intron 9 of 9)	-	CG	ENSOARG00000013244
14	5585681	5585711	31	-0.819	Distal Intergenic	+	CG	ENSOARG00000010942
8	84054274	84054364	91	-0.818	Intron (ENSOART00000005212/ENSOARG00000004788, intron 4 of 9)	-	CG	ENSOARG00000004781
2	119487812	119487818	7	-0.817	Distal Intergenic	-	CG	ENSOARG00000016476
11	47845628	47845644	17	-0.805	Intron (ENSOART00000015946/ENSOARG00000014649, intron 10 of 10)	-	CG	ENSOARG00000014649
2	138134720	138134735	16	-0.8	Intron (ENSOART00000002833/ENSOARG00000002595, intron 24 of 33)	-	CG	ENSOARG00000002595
8	23897248	23897422	175	-0.798	Distal Intergenic	-	CG	ENSOARG00000009527
2	139454270	139454282	13	-0.797	Intron (ENSOART00000004576/ENSOARG00000004206, intron 15 of 15)	-	CG	ENSOARG00000004206
6	90025582	90025812	231	-0.796	Intron (ENSOART00000016621/ENSOARG00000015272, intron 6 of 8)	-	CG	ENSOARG00000015272
1	159077418	159077632	215	-0.795	Distal Intergenic	+	CG	ENSOARG00000017360
9	78621120	78621131	12	-0.795	Intron (ENSOART00000003551/ENSOARG00000003274, intron 4 of 9)	+	CG	ENSOARG00000003274
3	39136023	39136231	209	-0.792	Intron (ENSOART00000021607/ENSOARG00000019845, intron 1 of 1)	+	CG	ENSOARG00000019845
10	84038035	84038070	36	-0.785	Distal Intergenic	-	CG	ENSOARG00000005897
23	57855563	57855575	13	-0.784	Intron (ENSOART00000006025/ENSOARG00000005525, intron 1 of 16)	+	CG	ENSOARG00000005525
1	139150637	139150671	35	-0.783	Distal Intergenic	-	CG	ENSOARG00000015924
7	8748614	8748635	22	-0.782	Distal Intergenic	-	CG	ENSOARG00000017087
15	4085137	4085175	39	-0.782	Intron (ENSOART00000003570/ENSOARG00000003293, intron 3 of 6)	-	CG	ENSOARG00000016917
4	25349999	25350015	17	-0.781	Intron (ENSOART00000009732/ENSOARG00000008934, intron 1 of 5)	+	CG	ENSOARG00000008934
5	60459358	60459382	25	-0.779	Distal Intergenic	-	CG	ENSOARG00000009040
13	8987158	8987790	633	-0.779	Distal Intergenic	+	CG	ENSOARG00000011620
1	5049338	5049389	52	-0.779	Intron (ENSOART00000020837/ENSOARG00000019132, intron 9 of 21)	-	CG	ENSOARG00000000331
3	94927948	94927953	6	-0.776	Intron (ENSOART00000012679/ENSOARG00000011658, intron 4 of 13)	+	CG	ENSOARG00000011643
12	65785065	65785092	28	-0.772	Distal Intergenic	-	CG	ENSOARG00000007592
1	70804447	70804457	11	-0.772	Intron (ENSOART00000018794/ENSOARG00000017266, intron 17 of 23)	+	CG	ENSOARG00000017266
2	182666558	182666721	164	-0.769	Distal Intergenic	+	CG	ENSOARG00000012303
6	21839479	21839619	141	-0.769	Intron (ENSOART00000012039/ENSOARG00000011059, intron 26 of 36)	+	CG	ENSOARG00000011586
17	41555612	41555635	24	-0.766	Intron (ENSOART00000006766/ENSOARG00000006222, intron 4 of 15)	-	CG	ENSOARG00000004530
22	7878317	7878346	30	-0.765	Distal Intergenic	-	CG	ENSOARG00000014757
11	42767432	42767455	24	-0.758	Distal Intergenic	+	CG	ENSOARG00000000118
7	70410866	70410920	55	-0.758	Intron (ENSOART00000023028/ENSOARG00000021134, intron 1 of 13)	+	CG	ENSOARG00000021134
9	69481427	69481442	16	-0.758	Promoter (<=1kb)	+	CG	ENSOARG00000015100
2	225982250	225982283	34	-0.756	Intron (ENSOART00000022259/ENSOARG00000020437, intron 35 of 55)	-	CG	ENSOARG00000020437
16	36132713	36132766	54	-0.755	Distal Intergenic	-	CG	ENSOARG00000010082
3	19619735	19619748	14	-0.755	Intron (ENSOART00000016883/ENSOARG00000015507, intron 1 of 20)	-	CG	ENSOARG00000015507
1	256521094	256521171	78	-0.754	Intron (ENSOART00000010041/ENSOARG00000009221, intron 6 of 9)	+	CG	ENSOARG00000009221
10	85305255	85305268	14	-0.752	Distal Intergenic	-	CG	ENSOARG00000007259
2	171613306	171613361	56	-0.75	Distal Intergenic	-	CG	ENSOARG00000010353
8	19678642	19678752	111	-0.748	Intron (ENSOART00000009403/ENSOARG00000008638, intron 1 of 6)	-	CG	ENSOARG00000008638
3	147148669	147148720	52	-0.746	Intron (ENSOART00000021772/ENSOARG00000019998, intron 4 of 9)	+	CG	ENSOARG00000019998
15	33464407	33464456	50	-0.745	Distal Intergenic	-	CG	ENSOARG00000000271
3	135849451	135849553	103	-0.745	Distal Intergenic	+	CG	ENSOARG00000017839
18	3951935	3951942	8	-0.745	Intron (ENSOART00000010173/ENSOARG00000009346, intron 2 of 7)	+	CG	ENSOARG00000009346
11	60111356	60111545	190	-0.743	Distal Intergenic	-	CG	ENSOARG00000013869
16	61981636	61981854	219	-0.74	Intron (ENSOART00000015087/ENSOARG00000013859, intron 10 of 20)	+	CG	ENSOARG00000013859
15	26803082	26803326	245	-0.739	Distal Intergenic	+	CG	ENSOARG00000001643
12	56721281	56721560	280	-0.737	Distal Intergenic	+	CG	ENSOARG00000015336
12	68193911	68193918	8	-0.736	Distal Intergenic	-	CG	ENSOARG00000009324
4	58919562	58919591	30	-0.735	Distal Intergenic	-	CG	ENSOARG00000003499
18	45843120	45843128	9	-0.733	Intron (ENSOART00000008906/ENSOARG00000008179, intron 7 of 8)	+	CG	ENSOARG00000008050
5	32555336	32555389	54	-0.732	Distal Intergenic	+	CG	ENSOARG00000001662
24	39445605	39445647	43	-0.732	Intron (ENSOART00000004217/ENSOARG00000003856, intron 37 of 50)	-	CG	ENSOARG00000003856
8	8895864	8896041	178	-0.731	Distal Intergenic	-	CG	ENSOARG00000007199
23	22560894	22561044	151	-0.73	Promoter (1-2kb)	+	CG	ENSOARG00000003832
6	19610954	19611019	66	-0.73	Promoter (1-2kb)	+	CG	ENSOARG00000010172
18	25565016	25565212	197	-0.728	Distal Intergenic	+	CG	ENSOARG00000015492
1	268962569	268962579	11	-0.727	Distal Intergenic	-	CG	ENSOARG00000014488
13	30880117	30880134	18	-0.726	Intron (ENSOART00000012501/ENSOARG00000011498, intron 4 of 5)	-	CG	ENSOARG00000011498
13	17361809	17361836	28	-0.725	Intron (ENSOART00000018541/ENSOARG00000017029, intron 4 of 20)	+	CG	ENSOARG00000017029
20	42678414	42678425	12	-0.724	Distal Intergenic	-	CG	ENSOARG00000013835
5	66412250	66412269	20	-0.724	Intron (ENSOART00000013356/ENSOARG00000012284, intron 2 of 6)	+	CG	ENSOARG00000012284
22	28046060	28046102	43	-0.723	Distal Intergenic	-	CG	ENSOARG00000009016
2	45486170	45486198	29	-0.722	Distal Intergenic	+	CG	ENSOARG00000010699
19	45925116	45925295	180	-0.722	Distal Intergenic	+	CG	ENSOARG00000015697
1	223573416	223573497	82	-0.721	Distal Intergenic	-	CG	ENSOARG00000001842
1	47963018	47963041	24	-0.717	Distal Intergenic	+	CG	ENSOARG00000012123
16	21807316	21807369	54	-0.716	Distal Intergenic	+	CG	ENSOARG00000005532
1	223727573	223727821	249	-0.714	Distal Intergenic	-	CG	ENSOARG00000001842
3	38552693	38552735	43	-0.714	Distal Intergenic	+	CG	ENSOARG00000019784
13	72022465	72022558	94	-0.714	Intron (ENSOART00000003978/ENSOARG00000003661, intron 1 of 8)	+	CG	ENSOARG00000003661
5	80054980	80055032	53	-0.713	Distal Intergenic	-	CG	ENSOARG00000015577
X	106216400	106216462	63	-0.713	Distal Intergenic	+	CG	ENSOARG00000014539
21	4668783	4668908	126	-0.712	Exon (ENSOART00000003549/ENSOARG00000003268, exon 10 of 20)	-	CG	ENSOARG00000003268
1	99205287	99205419	133	-0.711	Distal Intergenic	-	CG	ENSOARG00000020772
25	4644014	4644032	19	-0.711	Intron (ENSOART00000003566/ENSOARG00000003291, intron 5 of 10)	+	CG	ENSOARG00000003291
5	64569645	64569681	37	-0.71	Distal Intergenic	+	CG	ENSOARG00000010512
3	35317616	35317890	275	-0.709	Distal Intergenic	+	CG	ENSOARG00000019515
3	1847156	1847167	12	-0.709	Intron (ENSOART00000002463/ENSOARG00000002277, intron 4 of 12)	+	CG	ENSOARG00000002665
1	249727175	249727287	113	-0.707	Distal Intergenic	-	CG	ENSOARG00000015598
8	9184876	9184903	28	-0.706	Intron (ENSOART00000007892/ENSOARG00000007250, intron 3 of 27)	-	CG	ENSOARG00000007250
24	31720293	31720302	10	-0.705	Distal Intergenic	+	CG	ENSOARG00000010816
13	45191932	45192103	172	-0.705	Distal Intergenic	+	CG	ENSOARG00000014235
X	132367728	132367821	94	-0.704	Distal Intergenic	-	CG	ENSOARG00000002471
5	70214405	70214421	17	-0.704	Distal Intergenic	-	CG	ENSOARG00000013743
12	9113812	9113839	28	-0.703	Distal Intergenic	+	CG	ENSOARG00000009173
18	59616550	59616557	8	-0.702	Distal Intergenic	+	CG	ENSOARG00000013848
1	179551806	179552075	270	-0.701	Distal Intergenic	-	CG	ENSOARG00000019641
1	250435204	250435367	164	-0.7	Distal Intergenic	-	CG	ENSOARG00000007798
23	12101322	12101356	35	-0.699	Distal Intergenic	-	CG	ENSOARG00000005110
4	15039173	15039312	140	-0.698	Distal Intergenic	-	CG	ENSOARG00000004686
22	31816950	31816989	40	-0.698	Distal Intergenic	-	CG	ENSOARG00000011700
9	63781715	63781834	120	-0.698	Intron (ENSOART00000012260/ENSOARG00000011267, intron 2 of 69)	+	CG	ENSOARG00000011267
21	7390515	7390557	43	-0.697	Distal Intergenic	+	CG	ENSOARG00000004115
6	24149233	24149383	151	-0.697	Distal Intergenic	+	CG	ENSOARG00000013694
18	51719626	51719678	53	-0.696	Distal Intergenic	-	CG	ENSOARG00000013830
11	33797877	33797950	74	-0.694	Intron (ENSOART00000020117/ENSOARG00000018480, intron 7 of 8)	-	CG	ENSOARG00000018414
22	28445579	28445588	10	-0.693	Distal Intergenic	-	CG	ENSOARG00000009016
15	26804159	26804176	18	-0.693	Distal Intergenic	+	CG	ENSOARG00000001643
4	95886422	95886709	288	-0.693	Intron (ENSOART00000007014/ENSOARG00000006427, intron 25 of 36)	-	CG	ENSOARG00000006427
1	171329497	171329562	66	-0.692	Distal Intergenic	-	CG	ENSOARG00000018871
5	106735645	106735653	9	-0.692	Intron (ENSOART00000020607/ENSOARG00000018924, intron 2 of 14)	-	CG	ENSOARG00000018924
3	135915888	135915902	15	-0.692	Promoter (2-3kb)	+	CG	ENSOARG00000017839
6	86953682	86953729	48	-0.69	Distal Intergenic	+	CG	ENSOARG00000013035
6	15171424	15171478	55	-0.689	Distal Intergenic	-	CG	ENSOARG00000003714
6	46412946	46412993	48	-0.689	Distal Intergenic	+	CG	ENSOARG00000008918
18	29592877	29592904	28	-0.688	Distal Intergenic	+	CG	ENSOARG00000000587
13	80865920	80865927	8	-0.687	Distal Intergenic	-	CG	ENSOARG00000014961
3	99183661	99183667	7	-0.687	Intron (ENSOART00000014205/ENSOARG00000013068, intron 16 of 17)	-	CG	ENSOARG00000013068
24	29512449	29512466	18	-0.686	Distal Intergenic	-	CG	ENSOARG00000010813
12	69416139	69416355	217	-0.685	Distal Intergenic	-	CG	ENSOARG00000010759
22	6625731	6625768	38	-0.685	Distal Intergenic	-	CG	ENSOARG00000013619
19	20311956	20311964	9	-0.685	Distal Intergenic	+	CG	ENSOARG00000014064
26	30892480	30892493	14	-0.685	Intron (ENSOART00000000683/ENSOARG00000000631, intron 22 of 26)	+	CG	ENSOARG00000000631
15	55785394	55785427	34	-0.683	Distal Intergenic	+	CG	ENSOARG00000014512
25	37665043	37665105	63	-0.68	Distal Intergenic	+	CG	ENSOARG00000010379
12	74364081	74364102	22	-0.68	Distal Intergenic	+	CG	ENSOARG00000015257
6	19078226	19078386	161	-0.68	Intron (ENSOART00000010283/ENSOARG00000009441, intron 2 of 24)	+	CG	ENSOARG00000009441
6	13739198	13739376	179	-0.679	Distal Intergenic	-	CG	ENSOARG00000003213
3	33429902	33429917	16	-0.679	Intron (ENSOART00000020441/ENSOARG00000018771, intron 6 of 9)	+	CG	ENSOARG00000018771
4	69499504	69499519	16	-0.678	Distal Intergenic	-	CG	ENSOARG00000010012
8	73065354	73065548	195	-0.678	Distal Intergenic	+	CG	ENSOARG00000002548
5	50983005	50983043	39	-0.677	Distal Intergenic	-	CG	ENSOARG00000001851
2	2054770	2054862	93	-0.676	Distal Intergenic	+	CG	ENSOARG00000002911
5	10053866	10053884	19	-0.675	Distal Intergenic	-	CG	ENSOARG00000008265
17	21637519	21637545	27	-0.675	Distal Intergenic	-	CG	ENSOARG00000014454
24	16864378	16864412	35	-0.675	Promoter (1-2kb)	-	CG	ENSOARG00000011543
2	39449353	39449364	12	-0.674	Intron (ENSOART00000010694/ENSOARG00000009825, intron 6 of 15)	+	CG	ENSOARG00000009825
22	26970947	26971034	88	-0.673	Distal Intergenic	-	CG	ENSOARG00000008709
3	33922839	33922857	19	-0.673	Distal Intergenic	+	CG	ENSOARG00000019004
2	48939251	48939274	24	-0.673	Intron (ENSOART00000012055/ENSOARG00000011082, intron 1 of 18)	+	CG	ENSOARG00000011082
22	14157290	14157332	43	-0.672	Distal Intergenic	+	CG	ENSOARG00000001556
4	48184453	48184531	79	-0.672	Intron (ENSOART00000005398/ENSOARG00000004957, intron 1 of 10)	+	CG	ENSOARG00000004957
2	162783097	162783208	112	-0.671	Distal Intergenic	-	CG	ENSOARG00000009855
8	53974706	53974727	22	-0.671	Distal Intergenic	-	CG	ENSOARG00000013550
2	126172889	126172896	8	-0.671	Distal Intergenic	+	CG	ENSOARG00000016802
18	52092603	52092620	18	-0.669	Distal Intergenic	-	CG	ENSOARG00000013830
21	13858227	13858239	13	-0.669	Distal Intergenic	-	CG	ENSOARG00000015261
1	4134989	4135004	16	-0.669	Distal Intergenic	-	CG	ENSOARG00000019114
15	67388869	67389158	290	-0.669	Distal Intergenic	-	CG	ENSOARG00000019117
21	4753627	4753752	126	-0.669	Distal Intergenic	+	CG	ENSOARG00000003362
23	27107033	27107040	8	-0.669	Distal Intergenic	+	CG	ENSOARG00000006831
1	159278658	159278684	27	-0.669	Distal Intergenic	+	CG	ENSOARG00000017360
25	42168027	42168188	162	-0.669	Intron (ENSOART00000001515/ENSOARG00000001405, intron 1 of 28)	-	CG	ENSOARG00000001287
16	36232507	36232553	47	-0.668	Distal Intergenic	-	CG	ENSOARG00000010082
8	25113234	25113335	102	-0.668	Distal Intergenic	+	CG	ENSOARG00000009580
18	29214787	29214798	12	-0.668	Intron (ENSOART00000000231/ENSOARG00000000224, intron 4 of 12)	+	CG	ENSOARG00000000224
6	98722250	98722260	11	-0.667	Distal Intergenic	-	CG	ENSOARG00000003161
3	128719370	128719403	34	-0.667	Distal Intergenic	+	CG	ENSOARG00000015768
25	44258514	44258526	13	-0.666	Distal Intergenic	-	CG	ENSOARG00000002926
22	15988919	15988991	73	-0.665	Distal Intergenic	-	CG	ENSOARG00000005814
21	5934683	5934722	40	-0.665	Distal Intergenic	+	CG	ENSOARG00000014407
25	31814787	31814820	34	-0.665	Intron (ENSOART00000009840/ENSOARG00000009033, intron 3 of 3)	+	CG	ENSOARG00000009033
19	51074164	51074429	266	-0.665	Intron (ENSOART00000017569/ENSOARG00000016132, intron 1 of 8)	+	CG	ENSOARG00000016132
4	57714399	57714418	20	-0.664	Distal Intergenic	-	CG	ENSOARG00000003374
2	140247090	140247106	17	-0.664	Intron (ENSOART00000004687/ENSOARG00000004301, intron 14 of 16)	+	CG	ENSOARG00000004301
3	131513449	131513459	11	-0.664	Intron (ENSOART00000017493/ENSOARG00000016063, intron 5 of 5)	-	CG	ENSOARG00000016063
25	36362990	36363083	94	-0.663	Distal Intergenic	+	CG	ENSOARG00000010332
6	86438450	86438461	12	-0.663	Intron (ENSOART00000013465/ENSOARG00000012378, intron 19 of 24)	-	CG	ENSOARG00000013002
1	116835705	116835727	23	-0.662	Distal Intergenic	+	CG	ENSOARG00000011793
2	205004443	205004449	7	-0.662	Distal Intergenic	+	CG	ENSOARG00000018331
1	223624611	223624634	24	-0.661	Distal Intergenic	-	CG	ENSOARG00000001842
7	88307677	88307689	13	-0.661	Distal Intergenic	-	CG	ENSOARG00000002802
20	16200429	16200494	66	-0.661	Distal Intergenic	-	CG	ENSOARG00000003358
5	64523673	64523960	288	-0.661	Distal Intergenic	+	CG	ENSOARG00000010512
25	34230262	34230274	13	-0.66	Distal Intergenic	-	CG	ENSOARG00000009718
2	164628269	164628301	33	-0.66	Distal Intergenic	+	CG	ENSOARG00000009898
18	7577439	7577468	30	-0.66	Distal Intergenic	+	CG	ENSOARG00000010107
13	50742674	50742890	217	-0.659	Distal Intergenic	+	CG	ENSOARG00000004723
16	35006423	35006603	181	-0.659	Distal Intergenic	+	CG	ENSOARG00000009510
7	97300449	97300619	171	-0.659	Intron (ENSOART00000003599/ENSOARG00000003285, intron 36 of 40)	-	CG	ENSOARG00000003285
X	132469736	132469744	9	-0.658	Distal Intergenic	-	CG	ENSOARG00000002471
5	80022171	80022608	438	-0.658	Distal Intergenic	-	CG	ENSOARG00000015577
8	888557	888573	17	-0.656	Distal Intergenic	-	CG	ENSOARG00000006317
2	62015142	62015288	147	-0.656	Distal Intergenic	-	CG	ENSOARG00000012659
1	264596737	264596839	103	-0.656	Distal Intergenic	+	CG	ENSOARG00000013511
6	74726959	74726965	7	-0.654	Distal Intergenic	-	CG	ENSOARG00000005761
5	92963776	92963806	31	-0.654	Distal Intergenic	-	CG	ENSOARG00000017599
18	60879969	60879978	10	-0.654	Distal Intergenic	+	CG	ENSOARG00000000106
2	42296283	42296382	100	-0.654	Promoter (1-2kb)	-	CG	ENSOARG00000010146
2	63701567	63701655	89	-0.653	Distal Intergenic	+	CG	ENSOARG00000012740
2	121233001	121233022	22	-0.653	Distal Intergenic	+	CG	ENSOARG00000016567
3	133407724	133407866	143	-0.653	Distal Intergenic	+	CG	ENSOARG00000016800
1	264324712	264324756	45	-0.653	Intron (ENSOART00000014574/ENSOARG00000013377, intron 19 of 39)	+	CG	ENSOARG00000013377
6	90016904	90016913	10	-0.653	Intron (ENSOART00000016621/ENSOARG00000015272, intron 5 of 8)	-	CG	ENSOARG00000015272
1	274841962	274841972	11	-0.653	Intron (ENSOART00000017041/ENSOARG00000015658, intron 11 of 15)	+	CG	ENSOARG00000015658
7	27051768	27051782	15	-0.653	Intron (ENSOART00000021743/ENSOARG00000019972, intron 4 of 4)	-	CG	ENSOARG00000019972
15	22530636	22530646	11	-0.652	Distal Intergenic	-	CG	ENSOARG00000016674
8	86265916	86266043	128	-0.652	Distal Intergenic	+	CG	ENSOARG00000004811
11	4810456	4810489	34	-0.652	Distal Intergenic	+	CG	ENSOARG00000005016
11	33455986	33456007	22	-0.652	Exon (ENSOART00000019598/ENSOARG00000018005, exon 12 of 17)	+	CG	ENSOARG00000018005
1	108784550	108784562	13	-0.651	Distal Intergenic	-	CG	ENSOARG00000007326
19	5012206	5012219	14	-0.651	Distal Intergenic	+	CG	ENSOARG00000014726
15	43109173	43109181	9	-0.651	Intron (ENSOART00000014753/ENSOARG00000013562, intron 16 of 22)	+	CG	ENSOARG00000013951
17	20003104	20003168	65	-0.65	Distal Intergenic	+	CG	ENSOARG00000014358
2	151402775	151402810	36	-0.649	Distal Intergenic	-	CG	ENSOARG00000007945
22	27627462	27627578	117	-0.649	Distal Intergenic	-	CG	ENSOARG00000008709
8	36977077	36977317	241	-0.649	Distal Intergenic	-	CG	ENSOARG00000011775
20	21941006	21941208	203	-0.649	Distal Intergenic	-	CG	ENSOARG00000012068
4	48160658	48160831	174	-0.649	Distal Intergenic	+	CG	ENSOARG00000004957
15	41254663	41254678	16	-0.649	Distal Intergenic	+	CG	ENSOARG00000017129
3	96051913	96051952	40	-0.649	Intron (ENSOART00000013449/ENSOARG00000012369, intron 22 of 23)	-	CG	ENSOARG00000012369
15	9512052	9512206	155	-0.647	Distal Intergenic	+	CG	ENSOARG00000016934
23	22541156	22541577	422	-0.647	Intron (ENSOART00000006313/ENSOARG00000005795, intron 18 of 19)	+	CG	ENSOARG00000003832
18	5160656	5160973	318	-0.647	Intron (ENSOART00000010573/ENSOARG00000009711, intron 1 of 16)	+	CG	ENSOARG00000009711
9	33652822	33652841	20	-0.646	Distal Intergenic	-	CG	ENSOARG00000013197
3	41469927	41470036	110	-0.646	Distal Intergenic	-	CG	ENSOARG00000019962
22	32401432	32401570	139	-0.646	Distal Intergenic	+	CG	ENSOARG00000012282
24	37728187	37728236	50	-0.646	Promoter (<=1kb)	-	CG	ENSOARG00000000869
X	97848121	97848166	46	-0.645	Distal Intergenic	-	CG	ENSOARG00000012730
6	95330417	95330513	97	-0.645	Intron (ENSOART00000020720/ENSOARG00000019032, intron 2 of 2)	+	CG	ENSOARG00000019042
3	224139011	224139057	47	-0.645	Promoter (<=1kb)	-	CG	ENSOARG00000019916
X	39114609	39114794	186	-0.644	Distal Intergenic	-	CG	ENSOARG00000002735
4	25608810	25608820	11	-0.644	Distal Intergenic	-	CG	ENSOARG00000009122
4	48158297	48158307	11	-0.644	Distal Intergenic	+	CG	ENSOARG00000004957
23	33778526	33778544	19	-0.643	Distal Intergenic	-	CG	ENSOARG00000008157
21	13750233	13750280	48	-0.643	Distal Intergenic	-	CG	ENSOARG00000015261
16	42876997	42877049	53	-0.643	Distal Intergenic	+	CG	ENSOARG00000005703
6	99251966	99252200	235	-0.643	Intron (ENSOART00000003780/ENSOARG00000003468, intron 64 of 69)	-	CG	ENSOARG00000003468
1	221621156	221621189	34	-0.642	Distal Intergenic	-	CG	ENSOARG00000001736
6	61280281	61280348	68	-0.642	Intron (ENSOART00000015837/ENSOARG00000014541, intron 13 of 36)	+	CG	ENSOARG00000014180
7	30035615	30035887	273	-0.641	Distal Intergenic	-	CG	ENSOARG00000020017
23	9190507	9190512	6	-0.641	Distal Intergenic	+	CG	ENSOARG00000005040
4	4267044	4267064	21	-0.641	Distal Intergenic	+	CG	ENSOARG00000013596
25	13664540	13664557	18	-0.641	Intron (ENSOART00000004341/ENSOARG00000003995, intron 1 of 1)	+	CG	ENSOARG00000004013
23	24437878	24437967	90	-0.641	Intron (ENSOART00000006428/ENSOARG00000005904, intron 19 of 20)	+	CG	ENSOARG00000006008
1	95735294	95735360	67	-0.641	Intron (ENSOART00000022194/ENSOARG00000020381, intron 2 of 5)	-	CG	ENSOARG00000020381
2	166641833	166642114	282	-0.64	Distal Intergenic	-	CG	ENSOARG00000009938
23	57952092	57952127	36	-0.64	Intron (ENSOART00000006025/ENSOARG00000005525, intron 1 of 16)	-	CG	ENSOARG00000005476
1	190242709	190242769	61	-0.64	Intron (ENSOART00000022195/ENSOARG00000020383, intron 5 of 5)	-	CG	ENSOARG00000020383
16	36086966	36086975	10	-0.639	Distal Intergenic	-	CG	ENSOARG00000010082
12	57591132	57591161	30	-0.639	Distal Intergenic	-	CG	ENSOARG00000015730
10	40028092	40028381	290	-0.639	Distal Intergenic	-	CG	ENSOARG00000017107
23	3515989	3515994	6	-0.639	Distal Intergenic	+	CG	ENSOARG00000004562
9	60589410	60589566	157	-0.639	Distal Intergenic	+	CG	ENSOARG00000010674
4	67388666	67388771	106	-0.638	Distal Intergenic	-	CG	ENSOARG00000009058
18	60753963	60753974	12	-0.638	Distal Intergenic	+	CG	ENSOARG00000000106
11	28886490	28886760	271	-0.638	Intron (ENSOART00000007008/ENSOARG00000006444, intron 6 of 41)	-	CG	ENSOARG00000006444
22	26967701	26967727	27	-0.637	Distal Intergenic	-	CG	ENSOARG00000008709
9	1420850	1420867	18	-0.637	Distal Intergenic	-	CG	ENSOARG00000011143
5	100799743	100799782	40	-0.637	Distal Intergenic	-	CG	ENSOARG00000018705
5	100802193	100802455	263	-0.637	Distal Intergenic	-	CG	ENSOARG00000018705
1	260002775	260002804	30	-0.637	Distal Intergenic	+	CG	ENSOARG00000015757
3	130253508	130253661	154	-0.637	Distal Intergenic	+	CG	ENSOARG00000015895
4	96734525	96734536	12	-0.637	Intron (ENSOART00000007340/ENSOARG00000006757, intron 7 of 8)	-	CG	ENSOARG00000006757
18	8655381	8655394	14	-0.636	Distal Intergenic	-	CG	ENSOARG00000010116
19	21642992	21643039	48	-0.636	Intron (ENSOART00000008881/ENSOARG00000008132, intron 55 of 57)	-	CG	ENSOARG00000008132
15	73611514	73611644	131	-0.635	Distal Intergenic	-	CG	ENSOARG00000002243
4	58953573	58953618	46	-0.635	Distal Intergenic	-	CG	ENSOARG00000003499
16	69656041	69656129	89	-0.635	Distal Intergenic	-	CG	ENSOARG00000005781
18	61118303	61118360	58	-0.635	Distal Intergenic	+	CG	ENSOARG00000000106
13	29935017	29935028	12	-0.635	Distal Intergenic	+	CG	ENSOARG00000008963
4	96519375	96519460	86	-0.635	Intron (ENSOART00000007340/ENSOARG00000006757, intron 2 of 8)	+	CG	ENSOARG00000006747
3	216471846	216472150	305	-0.635	Intron (ENSOART00000019837/ENSOARG00000018228, intron 4 of 23)	+	CG	ENSOARG00000018228
23	26544009	26544194	186	-0.634	Distal Intergenic	+	CG	ENSOARG00000006831
10	54637178	54637189	12	-0.633	Distal Intergenic	-	CG	ENSOARG00000000372
1	22863152	22863242	91	-0.633	Distal Intergenic	-	CG	ENSOARG00000003993
13	76294337	76294346	10	-0.633	Distal Intergenic	-	CG	ENSOARG00000010543
24	1558202	1558214	13	-0.633	Distal Intergenic	-	CG	ENSOARG00000017201
25	34473299	34473328	30	-0.633	Distal Intergenic	+	CG	ENSOARG00000009725
22	1635587	1635692	106	-0.633	Distal Intergenic	+	CG	ENSOARG00000013042
8	46831901	46831914	14	-0.633	Intron (ENSOART00000013401/ENSOARG00000012321, intron 5 of 16)	+	CG	ENSOARG00000012321
21	4587818	4587828	11	-0.632	Distal Intergenic	+	CG	ENSOARG00000003206
7	98623508	98623588	81	-0.632	Distal Intergenic	+	CG	ENSOARG00000003410
9	32273268	32273282	15	-0.632	Intron (ENSOART00000012972/ENSOARG00000011884, intron 4 of 88)	-	CG	ENSOARG00000011310
12	26414461	26414626	166	-0.632	Intron (ENSOART00000018255/ENSOARG00000016755, intron 39 of 88)	-	CG	ENSOARG00000017157
9	89537972	89538035	64	-0.631	Distal Intergenic	-	CG	ENSOARG00000012954
10	2977656	2977678	23	-0.631	Distal Intergenic	+	CG	ENSOARG00000006414
25	36196596	36196791	196	-0.631	Distal Intergenic	+	CG	ENSOARG00000010332
3	14528746	14528870	125	-0.631	Distal Intergenic	+	CG	ENSOARG00000014585
6	10507913	10508084	172	-0.631	Distal Intergenic	+	CG	ENSOARG00000018069
2	221741074	221741080	7	-0.631	Distal Intergenic	+	CG	ENSOARG00000020261
1	30393538	30393828	291	-0.63	Distal Intergenic	-	CG	ENSOARG00000007826
3	40849996	40850039	44	-0.63	Distal Intergenic	-	CG	ENSOARG00000019948
2	208705633	208705647	15	-0.63	Distal Intergenic	+	CG	ENSOARG00000018890
14	5773397	5773445	49	-0.629	Distal Intergenic	-	CG	ENSOARG00000008034
9	81999789	81999854	66	-0.629	Distal Intergenic	+	CG	ENSOARG00000006070
13	80057398	80057431	34	-0.629	Distal Intergenic	+	CG	ENSOARG00000014918
3	45664079	45664090	12	-0.629	Distal Intergenic	+	CG	ENSOARG00000020133
6	10697045	10697056	12	-0.629	Intron (ENSOART00000019665/ENSOARG00000018069, intron 2 of 13)	+	CG	ENSOARG00000018069
5	104049722	104049729	8	-0.628	Distal Intergenic	-	CG	ENSOARG00000018761
3	167558974	167559233	260	-0.628	Distal Intergenic	+	CG	ENSOARG00000012899
1	216914586	216914658	73	-0.627	Distal Intergenic	-	CG	ENSOARG00000001009
2	62603413	62603480	68	-0.627	Distal Intergenic	-	CG	ENSOARG00000012672
3	221083840	221083869	30	-0.627	Distal Intergenic	-	CG	ENSOARG00000019563
1	16865968	16866108	141	-0.627	Intron (ENSOART00000022254/ENSOARG00000020435, intron 10 of 25)	+	CG	ENSOARG00000020435
11	39565435	39565491	57	-0.626	Distal Intergenic	-	CG	ENSOARG00000011334
25	37802671	37802739	69	-0.626	Distal Intergenic	+	CG	ENSOARG00000010379
10	41636366	41636445	80	-0.626	Distal Intergenic	+	CG	ENSOARG00000014987
21	6467684	6467702	19	-0.626	Intron (ENSOART00000004319/ENSOARG00000003973, intron 2 of 6)	+	CG	ENSOARG00000003973
15	61736179	61736185	7	-0.625	Distal Intergenic	-	CG	ENSOARG00000006865
17	15930542	15930633	92	-0.625	Distal Intergenic	+	CG	ENSOARG00000015086
6	91810557	91810601	45	-0.625	Distal Intergenic	+	CG	ENSOARG00000017732
25	10221959	10222121	163	-0.625	Intron (ENSOART00000004152/ENSOARG00000003817, intron 24 of 106)	+	CG	ENSOARG00000003817
9	849988	850008	21	-0.625	Intron (ENSOART00000012040/ENSOARG00000011066, intron 15 of 16)	-	CG	ENSOARG00000011066
6	111386336	111386342	7	-0.624	Distal Intergenic	-	CG	ENSOARG00000010267
6	8462685	8462982	298	-0.624	Distal Intergenic	+	CG	ENSOARG00000000262
6	84830770	84830969	200	-0.623	Distal Intergenic	-	CG	ENSOARG00000009858
3	91743513	91743726	214	-0.623	Distal Intergenic	-	CG	ENSOARG00000010758
4	54609601	54609626	26	-0.623	Distal Intergenic	+	CG	ENSOARG00000001892
7	50812055	50812276	222	-0.623	Distal Intergenic	+	CG	ENSOARG00000020878
16	62004508	62004562	55	-0.623	Intron (ENSOART00000015087/ENSOARG00000013859, intron 12 of 20)	+	CG	ENSOARG00000013884
16	62569594	62569603	10	-0.622	Distal Intergenic	-	CG	ENSOARG00000013954
10	57720227	57720412	186	-0.622	Distal Intergenic	+	CG	ENSOARG00000000468
3	223248577	223248624	48	-0.622	Distal Intergenic	+	CG	ENSOARG00000019587
2	231900766	231900835	70	-0.622	Distal Intergenic	+	CG	ENSOARG00000020677
1	28905373	28905381	9	-0.622	Intron (ENSOART00000008059/ENSOARG00000007404, intron 12 of 21)	+	CG	ENSOARG00000007424
X	88810234	88810329	96	-0.621	Distal Intergenic	-	CG	ENSOARG00000009951
15	49907033	49907322	290	-0.621	Distal Intergenic	+	CG	ENSOARG00000003807
6	92108473	92108562	90	-0.621	Intron (ENSOART00000019338/ENSOARG00000017771, intron 10 of 11)	-	CG	ENSOARG00000017771
24	22751608	22751618	11	-0.621	Intron (ENSOART00000020073/ENSOARG00000018442, intron 10 of 11)	+	CG	ENSOARG00000018479
3	184684277	184684317	41	-0.621	Intron (ENSOART00000021307/ENSOARG00000019564, intron 8 of 19)	+	CG	ENSOARG00000019588
22	13697848	13697899	52	-0.62	Distal Intergenic	-	CG	ENSOARG00000000321
1	242210588	242210610	23	-0.62	Distal Intergenic	-	CG	ENSOARG00000005732
1	196406058	196406065	8	-0.62	Distal Intergenic	-	CG	ENSOARG00000020481
4	27522555	27522810	256	-0.62	Intron (ENSOART00000010499/ENSOARG00000009641, intron 16 of 19)	+	CG	ENSOARG00000009641
19	53266965	53266982	18	-0.619	Intron (ENSOART00000009958/ENSOARG00000009139, intron 5 of 20)	+	CG	ENSOARG00000009139
4	27528719	27528951	233	-0.619	Intron (ENSOART00000010499/ENSOARG00000009641, intron 16 of 19)	+	CG	ENSOARG00000009641
15	73020166	73020196	31	-0.618	Distal Intergenic	+	CG	ENSOARG00000001835
1	264590393	264590430	38	-0.618	Distal Intergenic	+	CG	ENSOARG00000013511
6	2790777	2790820	44	-0.618	Distal Intergenic	+	CG	ENSOARG00000013716
16	61980965	61981232	268	-0.618	Intron (ENSOART00000015087/ENSOARG00000013859, intron 10 of 20)	+	CG	ENSOARG00000013859
3	145507339	145507597	259	-0.617	Distal Intergenic	-	CG	ENSOARG00000019839
3	64104278	64104328	51	-0.617	Distal Intergenic	+	CG	ENSOARG00000001663
2	164937760	164938125	366	-0.617	Intron (ENSOART00000010769/ENSOARG00000009898, intron 6 of 10)	-	CG	ENSOARG00000019688
10	77863247	77863281	35	-0.616	Distal Intergenic	-	CG	ENSOARG00000004918
9	27014918	27014945	28	-0.616	Distal Intergenic	-	CG	ENSOARG00000020152
23	28940171	28940240	70	-0.616	Distal Intergenic	+	CG	ENSOARG00000006907
12	76426543	76426598	56	-0.616	Distal Intergenic	+	CG	ENSOARG00000015980
2	16080456	16080668	213	-0.616	Intron (ENSOART00000007848/ENSOARG00000007213, intron 5 of 12)	-	CG	ENSOARG00000007213
25	29859706	29859723	18	-0.616	Intron (ENSOART00000009339/ENSOARG00000008576, intron 17 of 18)	-	CG	ENSOARG00000008609
9	70726775	70726979	205	-0.616	Intron (ENSOART00000016670/ENSOARG00000015316, intron 14 of 16)	-	CG	ENSOARG00000015316
2	202191126	202191154	29	-0.616	Intron (ENSOART00000018119/ENSOARG00000016635, intron 2 of 6)	-	CG	ENSOARG00000016635
17	66770018	66770034	17	-0.615	Distal Intergenic	-	CG	ENSOARG00000001775
9	24993002	24993015	14	-0.615	Distal Intergenic	-	CG	ENSOARG00000008005
15	41813488	41813506	19	-0.615	Distal Intergenic	-	CG	ENSOARG00000011248
11	42174543	42174830	288	-0.615	Distal Intergenic	+	CG	ENSOARG00000002687
23	297924	298076	153	-0.615	Distal Intergenic	+	CG	ENSOARG00000004028
23	27019274	27019528	255	-0.615	Distal Intergenic	+	CG	ENSOARG00000006831
2	155326004	155326049	46	-0.615	Distal Intergenic	+	CG	ENSOARG00000008044
1	264599274	264599350	77	-0.615	Distal Intergenic	+	CG	ENSOARG00000013511
1	1641581	1641589	9	-0.615	Distal Intergenic	+	CG	ENSOARG00000018675
2	42259300	42259313	14	-0.615	Intron (ENSOART00000011021/ENSOARG00000010126, intron 7 of 13)	-	CG	ENSOARG00000010146
6	42754385	42754403	19	-0.614	Distal Intergenic	-	CG	ENSOARG00000005581
22	29321704	29321972	269	-0.614	Distal Intergenic	-	CG	ENSOARG00000009016
12	10981655	10981856	202	-0.614	Distal Intergenic	-	CG	ENSOARG00000009891
3	105744876	105744900	25	-0.614	Distal Intergenic	+	CG	ENSOARG00000014353
1	50291859	50291905	47	-0.614	Intron (ENSOART00000013396/ENSOARG00000012319, intron 23 of 24)	-	CG	ENSOARG00000012407
22	45738894	45738947	54	-0.614	Intron (ENSOART00000014233/ENSOARG00000013080, intron 29 of 51)	-	CG	ENSOARG00000013914
4	13802628	13802644	17	-0.613	Distal Intergenic	-	CG	ENSOARG00000004307
10	50911457	50911743	287	-0.613	Distal Intergenic	-	CG	ENSOARG00000015582
23	45392958	45393014	57	-0.613	Distal Intergenic	+	CG	ENSOARG00000002339
10	79808489	79808566	78	-0.613	Distal Intergenic	+	CG	ENSOARG00000005401
22	2753694	2753723	30	-0.613	Distal Intergenic	+	CG	ENSOARG00000013084
7	98609114	98609168	55	-0.612	Distal Intergenic	+	CG	ENSOARG00000003410
X	98218123	98218150	28	-0.612	Distal Intergenic	+	CG	ENSOARG00000012746
15	4117997	4118002	6	-0.612	Intron (ENSOART00000003570/ENSOARG00000003293, intron 5 of 6)	-	CG	ENSOARG00000016917
21	7936426	7936503	78	-0.612	Intron (ENSOART00000004509/ENSOARG00000004148, intron 14 of 14)	-	CG	ENSOARG00000004148
8	88772404	88772419	16	-0.611	Distal Intergenic	-	CG	ENSOARG00000004962
17	68879827	68879838	12	-0.611	Distal Intergenic	-	CG	ENSOARG00000006849
12	69412584	69412596	13	-0.611	Distal Intergenic	-	CG	ENSOARG00000010759
2	217812419	217812424	6	-0.611	Distal Intergenic	-	CG	ENSOARG00000019426
20	6920991	6921224	234	-0.611	Distal Intergenic	+	CG	ENSOARG00000007035
25	37771781	37772058	278	-0.611	Distal Intergenic	+	CG	ENSOARG00000010379
7	11481619	11481921	303	-0.611	Distal Intergenic	+	CG	ENSOARG00000017648
2	124136666	124137003	338	-0.611	Distal Intergenic	+	CG	ENSOARG00000019595
6	103093714	103093746	33	-0.611	Intron (ENSOART00000007273/ENSOARG00000006688, intron 16 of 24)	-	CG	ENSOARG00000006688
6	64599629	64599792	164	-0.611	Intron (ENSOART00000016710/ENSOARG00000015357, intron 7 of 8)	-	CG	ENSOARG00000015357
6	97556291	97556470	180	-0.61	Distal Intergenic	-	CG	ENSOARG00000002231
1	238083042	238083052	11	-0.61	Distal Intergenic	-	CG	ENSOARG00000005395
X	5350999	5351088	90	-0.61	Distal Intergenic	-	CG	ENSOARG00000009603
23	38456536	38456554	19	-0.61	Distal Intergenic	-	CG	ENSOARG00000010437
20	50603529	50603612	84	-0.61	Distal Intergenic	+	CG	ENSOARG00000002818
4	16250630	16250651	22	-0.61	Intron (ENSOART00000006574/ENSOARG00000006046, intron 14 of 14)	-	CG	ENSOARG00000006046
2	151148018	151148044	27	-0.61	Promoter (1-2kb)	+	CG	ENSOARG00000007774
X	132036688	132036698	11	-0.609	Distal Intergenic	-	CG	ENSOARG00000002471
1	105155229	105155273	45	-0.609	Distal Intergenic	+	CG	ENSOARG00000006152
3	101195779	101195928	150	-0.609	Distal Intergenic	+	CG	ENSOARG00000013344
23	22535530	22535563	34	-0.609	Intron (ENSOART00000006313/ENSOARG00000005795, intron 18 of 19)	+	CG	ENSOARG00000003832
23	25069793	25069883	91	-0.609	Intron (ENSOART00000006580/ENSOARG00000006054, intron 2 of 6)	+	CG	ENSOARG00000006054
9	661448	661484	37	-0.609	Intron (ENSOART00000012040/ENSOARG00000011066, intron 3 of 16)	+	CG	ENSOARG00000020130
2	56847056	56847083	28	-0.608	Distal Intergenic	-	CG	ENSOARG00000012336
7	67141061	67141069	9	-0.608	Distal Intergenic	-	CG	ENSOARG00000021106
23	38953740	38953819	80	-0.608	Distal Intergenic	+	CG	ENSOARG00000003917
2	180207518	180207783	266	-0.608	Distal Intergenic	+	CG	ENSOARG00000011956
13	80050065	80050070	6	-0.608	Distal Intergenic	+	CG	ENSOARG00000014918
16	14547515	14547567	53	-0.608	Intron (ENSOART00000007016/ENSOARG00000006458, intron 4 of 14)	-	CG	ENSOARG00000006458
20	37960025	37960037	13	-0.607	Distal Intergenic	-	CG	ENSOARG00000010155
24	37528422	37528433	12	-0.607	Distal Intergenic	+	CG	ENSOARG00000000788
15	32288028	32288077	50	-0.607	Distal Intergenic	+	CG	ENSOARG00000017078
25	10462064	10462086	23	-0.607	Intron (ENSOART00000004152/ENSOARG00000003817, intron 91 of 106)	-	CG	ENSOARG00000003841
5	39630182	39630191	10	-0.606	Distal Intergenic	-	CG	ENSOARG00000012530
6	8533599	8533618	20	-0.606	Distal Intergenic	+	CG	ENSOARG00000000262
9	6140477	6140531	55	-0.605	Distal Intergenic	-	CG	ENSOARG00000012209
X	59675763	59675797	35	-0.605	Distal Intergenic	+	CG	ENSOARG00000015193
19	35687066	35687297	232	-0.605	Intron (ENSOART00000011682/ENSOARG00000010733, intron 1 of 24)	+	CG	ENSOARG00000010733
13	16102958	16102978	21	-0.605	Intron (ENSOART00000016762/ENSOARG00000015405, intron 1 of 10)	+	CG	ENSOARG00000015405
10	45731942	45731958	17	-0.604	Distal Intergenic	-	CG	ENSOARG00000017118
5	64525455	64525469	15	-0.604	Distal Intergenic	+	CG	ENSOARG00000010512
8	44834674	44834788	115	-0.604	Intron (ENSOART00000013315/ENSOARG00000012246, intron 1 of 2)	+	CG	ENSOARG00000012270
2	63372433	63372474	42	-0.604	Intron (ENSOART00000013836/ENSOARG00000012725, intron 7 of 17)	-	CG	ENSOARG00000012725
26	6248044	6248321	278	-0.603	Distal Intergenic	-	CG	ENSOARG00000006518
4	71291589	71291800	212	-0.603	Distal Intergenic	-	CG	ENSOARG00000010839
23	49476794	49476876	83	-0.603	Distal Intergenic	+	CG	ENSOARG00000004007
15	43048143	43048191	49	-0.603	Distal Intergenic	+	CG	ENSOARG00000013562
19	53893270	53893280	11	-0.603	Distal Intergenic	+	CG	ENSOARG00000014287
X	31722981	31722990	10	-0.603	Distal Intergenic	+	CG	ENSOARG00000018662
15	4043157	4043225	69	-0.603	Intron (ENSOART00000003570/ENSOARG00000003293, intron 3 of 6)	-	CG	ENSOARG00000016917
11	45487962	45488016	55	-0.603	Intron (ENSOART00000012441/ENSOARG00000011438, intron 12 of 15)	-	CG	ENSOARG00000011438
3	144156552	144156866	315	-0.603	Intron (ENSOART00000021494/ENSOARG00000019738, intron 1 of 7)	+	CG	ENSOARG00000019738
4	53011185	53011389	205	-0.602	Distal Intergenic	-	CG	ENSOARG00000001754
20	27285900	27285909	10	-0.602	Distal Intergenic	-	CG	ENSOARG00000011147
22	7870264	7870456	193	-0.602	Distal Intergenic	-	CG	ENSOARG00000014757
18	60534202	60534227	26	-0.602	Distal Intergenic	+	CG	ENSOARG00000000106
23	29855118	29855188	71	-0.602	Distal Intergenic	+	CG	ENSOARG00000006975
20	40258175	40258416	242	-0.602	Distal Intergenic	+	CG	ENSOARG00000012503
18	9244935	9244963	29	-0.602	Distal Intergenic	+	CG	ENSOARG00000017297
19	21652487	21652583	97	-0.602	Intron (ENSOART00000008881/ENSOARG00000008132, intron 55 of 57)	-	CG	ENSOARG00000008132
4	102341049	102341179	131	-0.602	Intron (ENSOART00000011644/ENSOARG00000010698, intron 12 of 19)	-	CG	ENSOARG00000010698
8	66984881	66985093	213	-0.601	Distal Intergenic	-	CG	ENSOARG00000001505
4	12789637	12789645	9	-0.601	Distal Intergenic	-	CG	ENSOARG00000003501
1	268800988	268801022	35	-0.601	Distal Intergenic	-	CG	ENSOARG00000014488
10	72427479	72427532	54	-0.601	Distal Intergenic	+	CG	ENSOARG00000002176
17	40607326	40607451	126	-0.601	Distal Intergenic	+	CG	ENSOARG00000006033
9	47170619	47170670	52	-0.601	Intron (ENSOART00000004469/ENSOARG00000004110, intron 6 of 6)	-	CG	ENSOARG00000004110
1	223495518	223495585	68	-0.6	Distal Intergenic	-	CG	ENSOARG00000001842
18	64503234	64503275	42	-0.6	Distal Intergenic	-	CG	ENSOARG00000013881
6	49708370	49708377	8	-0.6	Distal Intergenic	+	CG	ENSOARG00000009059
17	1518496	1518565	70	-0.6	Intron (ENSOART00000017701/ENSOARG00000016252, intron 9 of 20)	-	CG	ENSOARG00000016374
4	102793710	102793722	13	-0.6	Promoter (2-3kb)	+	CG	ENSOARG00000011618
10	81181321	81181338	18	-0.599	Distal Intergenic	-	CG	ENSOARG00000005404
4	30753810	30753894	85	-0.599	Distal Intergenic	-	CG	ENSOARG00000011766
13	20368938	20368956	19	-0.599	Distal Intergenic	+	CG	ENSOARG00000000344
21	6766439	6766478	40	-0.599	Distal Intergenic	+	CG	ENSOARG00000003994
2	29726531	29726632	102	-0.599	Distal Intergenic	+	CG	ENSOARG00000008514
6	18903290	18903333	44	-0.599	Distal Intergenic	+	CG	ENSOARG00000009048
16	47438574	47438593	20	-0.599	Distal Intergenic	+	CG	ENSOARG00000012712
2	80393695	80393749	55	-0.599	Distal Intergenic	+	CG	ENSOARG00000013796
2	239913422	239913541	120	-0.599	Intron (ENSOART00000005959/ENSOARG00000005466, intron 7 of 8)	+	CG	ENSOARG00000005466
14	32570975	32570994	20	-0.598	Distal Intergenic	-	CG	ENSOARG00000001829
1	254115885	254116098	214	-0.598	Distal Intergenic	-	CG	ENSOARG00000008737
15	68928434	68928523	90	-0.598	Distal Intergenic	-	CG	ENSOARG00000010601
1	260388213	260388291	79	-0.598	Distal Intergenic	+	CG	ENSOARG00000010585
19	20313808	20313954	147	-0.598	Distal Intergenic	+	CG	ENSOARG00000014064
15	32292132	32292233	102	-0.598	Distal Intergenic	+	CG	ENSOARG00000017078
3	10547086	10547145	60	-0.598	Intron (ENSOART00000013849/ENSOARG00000012741, intron 10 of 11)	-	CG	ENSOARG00000012811
5	66040248	66040262	15	-0.597	Distal Intergenic	-	CG	ENSOARG00000010828
26	5121449	5121459	11	-0.597	Distal Intergenic	+	CG	ENSOARG00000006183
6	20542760	20542778	19	-0.597	Distal Intergenic	+	CG	ENSOARG00000010678
1	128884899	128884927	29	-0.597	Distal Intergenic	+	CG	ENSOARG00000015187
20	43139494	43139513	20	-0.597	Intron (ENSOART00000015324/ENSOARG00000014073, intron 5 of 5)	-	CG	ENSOARG00000014073
6	13105002	13105092	91	-0.596	Distal Intergenic	-	CG	ENSOARG00000001809
16	6214402	6214428	27	-0.596	Distal Intergenic	-	CG	ENSOARG00000004344
10	12459134	12459207	74	-0.596	Distal Intergenic	-	CG	ENSOARG00000007167
X	91960292	91960302	11	-0.596	Distal Intergenic	-	CG	ENSOARG00000010738
10	55170541	55170701	161	-0.596	Distal Intergenic	+	CG	ENSOARG00000000420
17	66131435	66131580	146	-0.596	Distal Intergenic	+	CG	ENSOARG00000001670
2	35118080	35118418	339	-0.596	Distal Intergenic	+	CG	ENSOARG00000008920
3	89379154	89379243	90	-0.596	Distal Intergenic	+	CG	ENSOARG00000010279
5	69394106	69394145	40	-0.596	Distal Intergenic	+	CG	ENSOARG00000013532
X	35126757	35126777	21	-0.596	Intron (ENSOART00000000131/ENSOARG00000000125, intron 3 of 4)	-	CG	ENSOARG00000000125
11	7968590	7968602	13	-0.596	Intron (ENSOART00000008542/ENSOARG00000007848, intron 5 of 10)	-	CG	ENSOARG00000013763
25	28533158	28533195	38	-0.595	Distal Intergenic	-	CG	ENSOARG00000007226
X	29432668	29432682	15	-0.595	Distal Intergenic	+	CG	ENSOARG00000018334
6	95057316	95057426	111	-0.595	Distal Intergenic	+	CG	ENSOARG00000019032
3	29672240	29672346	107	-0.595	Distal Intergenic	+	CG	ENSOARG00000019479
1	14358763	14358772	10	-0.595	Distal Intergenic	+	CG	ENSOARG00000020169
9	46896533	46896568	36	-0.595	Intron (ENSOART00000004108/ENSOARG00000003779, intron 22 of 22)	-	CG	ENSOARG00000003779
3	118778078	118778106	29	-0.595	Intron (ENSOART00000016635/ENSOARG00000015285, intron 5 of 13)	+	CG	ENSOARG00000015285
9	73805354	73805575	222	-0.595	Intron (ENSOART00000018105/ENSOARG00000016622, intron 3 of 6)	-	CG	ENSOARG00000016509
2	125887124	125887357	234	-0.595	Intron (ENSOART00000018282/ENSOARG00000016782, intron 10 of 22)	-	CG	ENSOARG00000016782
X	132434317	132434358	42	-0.594	Distal Intergenic	-	CG	ENSOARG00000002471
22	28084121	28084134	14	-0.594	Distal Intergenic	-	CG	ENSOARG00000009016
18	10152669	10152701	33	-0.594	Distal Intergenic	-	CG	ENSOARG00000010173
1	92910695	92910745	51	-0.594	Distal Intergenic	+	CG	ENSOARG00000020213
26	20801596	20801662	67	-0.593	Distal Intergenic	-	CG	ENSOARG00000004160
X	126642034	126642038	5	-0.593	Distal Intergenic	-	CG	ENSOARG00000010159
2	195669505	195669532	28	-0.593	Distal Intergenic	-	CG	ENSOARG00000014261
6	103314841	103315015	175	-0.593	Distal Intergenic	+	CG	ENSOARG00000007030
8	19313910	19313960	51	-0.593	Distal Intergenic	+	CG	ENSOARG00000008594
26	32042357	32042603	247	-0.593	Exon (ENSOART00000001459/ENSOARG00000001359, exon 9 of 16)	+	CG	ENSOARG00000001359
3	91078438	91078446	9	-0.593	Intron (ENSOART00000011296/ENSOARG00000010376, intron 4 of 19)	-	CG	ENSOARG00000010344
11	20990177	20990263	87	-0.593	Intron (ENSOART00000011352/ENSOARG00000010429, intron 6 of 16)	-	CG	ENSOARG00000010429
6	61288782	61288910	129	-0.593	Intron (ENSOART00000015837/ENSOARG00000014541, intron 15 of 36)	+	CG	ENSOARG00000014180
3	51777078	51777242	165	-0.593	Intron (ENSOART00000022196/ENSOARG00000020384, intron 5 of 11)	+	CG	ENSOARG00000020384
4	58899201	58899211	11	-0.592	Distal Intergenic	-	CG	ENSOARG00000003499
9	79165202	79165242	41	-0.592	Distal Intergenic	-	CG	ENSOARG00000004616
2	147755166	147755329	164	-0.592	Distal Intergenic	-	CG	ENSOARG00000006791
12	68176746	68176809	64	-0.592	Distal Intergenic	-	CG	ENSOARG00000009324
9	86713144	86713175	32	-0.592	Distal Intergenic	-	CG	ENSOARG00000011197
26	25302505	25303094	590	-0.592	Distal Intergenic	+	CG	ENSOARG00000010366
3	103462309	103462357	49	-0.592	Distal Intergenic	+	CG	ENSOARG00000013689
3	190859188	190859314	127	-0.592	Distal Intergenic	+	CG	ENSOARG00000020110
23	38044845	38044850	6	-0.592	Intron (ENSOART00000011360/ENSOARG00000010437, intron 6 of 9)	-	CG	ENSOARG00000010437
22	45744317	45744363	47	-0.592	Intron (ENSOART00000014233/ENSOARG00000013080, intron 29 of 51)	-	CG	ENSOARG00000013914
20	41351739	41351768	30	-0.591	Distal Intergenic	-	CG	ENSOARG00000012936
9	30133208	30133345	138	-0.591	Distal Intergenic	-	CG	ENSOARG00000020165
7	47433731	47433765	35	-0.591	Distal Intergenic	+	CG	ENSOARG00000020826
7	40734987	40735013	27	-0.591	Exon (ENSOART00000022522/ENSOARG00000020672, exon 4 of 30)	-	CG	ENSOARG00000020672
13	28154305	28154411	107	-0.59	Distal Intergenic	-	CG	ENSOARG00000006835
23	28989044	28989153	110	-0.59	Distal Intergenic	+	CG	ENSOARG00000006907
1	263360702	263360975	274	-0.59	Distal Intergenic	+	CG	ENSOARG00000012584
19	4689064	4689277	214	-0.59	Distal Intergenic	+	CG	ENSOARG00000014726
26	6722790	6722805	16	-0.589	Distal Intergenic	-	CG	ENSOARG00000006813
13	30805204	30805316	113	-0.589	Distal Intergenic	+	CG	ENSOARG00000011328
14	11449045	11449061	17	-0.589	Distal Intergenic	+	CG	ENSOARG00000011513
20	38382463	38382478	16	-0.589	Intron (ENSOART00000011792/ENSOARG00000010837, intron 7 of 9)	+	CG	ENSOARG00000020102
7	12656890	12657022	133	-0.589	Intron (ENSOART00000019727/ENSOARG00000018113, intron 21 of 25)	+	CG	ENSOARG00000018084
6	12911463	12911485	23	-0.588	Distal Intergenic	-	CG	ENSOARG00000000537
3	69886361	69886371	11	-0.588	Distal Intergenic	-	CG	ENSOARG00000003600
11	33852844	33852875	32	-0.588	Distal Intergenic	-	CG	ENSOARG00000018520
26	7170924	7170968	45	-0.588	Distal Intergenic	+	CG	ENSOARG00000006852
19	41604470	41604509	40	-0.588	Distal Intergenic	+	CG	ENSOARG00000014125
8	50616730	50616854	125	-0.588	Distal Intergenic	+	CG	ENSOARG00000020012
13	73948979	73949009	31	-0.588	Exon (ENSOART00000006677/ENSOARG00000006138, exon 4 of 5)	-	CG	ENSOARG00000006138
6	86234870	86235016	147	-0.588	Intron (ENSOART00000013465/ENSOARG00000012378, intron 2 of 24)	+	CG	ENSOARG00000012378
13	8054530	8054766	237	-0.587	Distal Intergenic	-	CG	ENSOARG00000004386
16	69702674	69702734	61	-0.587	Distal Intergenic	-	CG	ENSOARG00000005781
3	65325718	65325738	21	-0.587	Distal Intergenic	+	CG	ENSOARG00000001759
1	66237395	66237429	35	-0.587	Distal Intergenic	+	CG	ENSOARG00000015578
9	39545109	39545118	10	-0.587	Distal Intergenic	+	CG	ENSOARG00000016456
14	42563955	42563962	8	-0.587	Intron (ENSOART00000004659/ENSOARG00000004279, intron 2 of 11)	-	CG	ENSOARG00000004279
11	4840405	4840626	222	-0.587	Intron (ENSOART00000005469/ENSOARG00000005016, intron 4 of 17)	+	CG	ENSOARG00000005016
2	197764010	197764020	11	-0.587	Intron (ENSOART00000016157/ENSOARG00000014836, intron 28 of 28)	-	CG	ENSOARG00000014836
19	53904035	53904055	21	-0.587	Promoter (2-3kb)	+	CG	ENSOARG00000014287
22	37983010	37983037	28	-0.586	Distal Intergenic	-	CG	ENSOARG00000000294
15	73620181	73620270	90	-0.586	Distal Intergenic	-	CG	ENSOARG00000002243
2	78705106	78705267	162	-0.586	Distal Intergenic	-	CG	ENSOARG00000008591
20	46736759	46736765	7	-0.586	Distal Intergenic	-	CG	ENSOARG00000017319
15	48361690	48361713	24	-0.586	Distal Intergenic	+	CG	ENSOARG00000006278
2	761766	761806	41	-0.586	Intron (ENSOART00000005754/ENSOARG00000005275, intron 9 of 22)	-	CG	ENSOARG00000005275
3	126250774	126250909	136	-0.585	Distal Intergenic	-	CG	ENSOARG00000015680
10	40356870	40357024	155	-0.585	Distal Intergenic	-	CG	ENSOARG00000017107
23	2196204	2196223	20	-0.585	Distal Intergenic	+	CG	ENSOARG00000004374
2	16696212	16696373	162	-0.584	Distal Intergenic	-	CG	ENSOARG00000007239
2	186968030	186968349	320	-0.584	Distal Intergenic	-	CG	ENSOARG00000013467
21	42008927	42008933	7	-0.584	Distal Intergenic	+	CG	ENSOARG00000007576
1	264595155	264595363	209	-0.584	Distal Intergenic	+	CG	ENSOARG00000013511
10	5184799	5184867	69	-0.584	Intron (ENSOART00000007066/ENSOARG00000006501, intron 1 of 1)	-	CG	ENSOARG00000006501
8	10625328	10625426	99	-0.584	Intron (ENSOART00000008233/ENSOARG00000007561, intron 3 of 27)	+	CG	ENSOARG00000019961
6	106807652	106807694	43	-0.583	Distal Intergenic	-	CG	ENSOARG00000008320
1	63408665	63408720	56	-0.583	Intron (ENSOART00000016224/ENSOARG00000014907, intron 1 of 6)	+	CG	ENSOARG00000014907
25	41968493	41968506	14	-0.582	Distal Intergenic	-	CG	ENSOARG00000001226
4	58326465	58326740	276	-0.582	Distal Intergenic	-	CG	ENSOARG00000003374
X	3340854	3340877	24	-0.582	Distal Intergenic	-	CG	ENSOARG00000009380
5	31221942	31221966	25	-0.582	Distal Intergenic	-	CG	ENSOARG00000016643
8	76326080	76326118	39	-0.582	Distal Intergenic	-	CG	ENSOARG00000025164
15	75495460	75495540	81	-0.582	Intron (ENSOART00000007401/ENSOARG00000006810, intron 2 of 7)	-	CG	ENSOARG00000006642
8	32321867	32321914	48	-0.582	Intron (ENSOART00000012439/ENSOARG00000011435, intron 12 of 24)	+	CG	ENSOARG00000011435
13	66309217	66309391	175	-0.582	Intron (ENSOART00000019702/ENSOARG00000018097, intron 11 of 15)	+	CG	ENSOARG00000018351
6	11365736	11365989	254	-0.581	Distal Intergenic	-	CG	ENSOARG00000000283
13	56842380	56842434	55	-0.581	Distal Intergenic	-	CG	ENSOARG00000004809
1	224916276	224916293	18	-0.581	Distal Intergenic	-	CG	ENSOARG00000014982
10	9468998	9469024	27	-0.581	Distal Intergenic	+	CG	ENSOARG00000006691
14	5582254	5582823	570	-0.581	Distal Intergenic	+	CG	ENSOARG00000010942
5	69384066	69384246	181	-0.581	Distal Intergenic	+	CG	ENSOARG00000013532
7	1847805	1848270	466	-0.581	Distal Intergenic	+	CG	ENSOARG00000016178
4	9675270	9675280	11	-0.581	Distal Intergenic	+	CG	ENSOARG00000018184
13	60760709	60760758	50	-0.581	Intron (ENSOART00000002310/ENSOARG00000002139, intron 10 of 14)	-	CG	ENSOARG00000002416
1	234894836	234894989	154	-0.581	Intron (ENSOART00000004533/ENSOARG00000004134, intron 29 of 41)	+	CG	ENSOARG00000004238
5	12219179	12219263	85	-0.58	Distal Intergenic	-	CG	ENSOARG00000014039
5	93037584	93037608	25	-0.58	Distal Intergenic	-	CG	ENSOARG00000017599
16	63462909	63462938	30	-0.58	Distal Intergenic	+	CG	ENSOARG00000014361
13	66143328	66143580	253	-0.58	Distal Intergenic	+	CG	ENSOARG00000018097
4	95872063	95872182	120	-0.58	Intron (ENSOART00000007014/ENSOARG00000006427, intron 23 of 36)	-	CG	ENSOARG00000006427
15	33197977	33197989	13	-0.579	Distal Intergenic	-	CG	ENSOARG00000000084
6	41220211	41220392	182	-0.579	Distal Intergenic	+	CG	ENSOARG00000005453
6	2698656	2698809	154	-0.579	Distal Intergenic	+	CG	ENSOARG00000013669
1	13544237	13544247	11	-0.579	Distal Intergenic	+	CG	ENSOARG00000019987
6	13115071	13115180	110	-0.578	3' UTR	-	CG	ENSOARG00000001809
1	225909351	225909384	34	-0.578	Distal Intergenic	-	CG	ENSOARG00000002227
18	8501768	8501777	10	-0.578	Distal Intergenic	-	CG	ENSOARG00000010116
12	63410860	63410868	9	-0.578	Distal Intergenic	+	CG	ENSOARG00000002522
23	29301424	29301640	217	-0.578	Distal Intergenic	+	CG	ENSOARG00000003873
19	42807696	42807716	21	-0.578	Distal Intergenic	+	CG	ENSOARG00000012034
7	76895568	76895583	16	-0.578	Distal Intergenic	+	CG	ENSOARG00000021176
19	18878796	18878960	165	-0.578	Intron (ENSOART00000008341/ENSOARG00000007668, intron 6 of 8)	-	CG	ENSOARG00000007668
14	54724702	54724747	46	-0.578	Intron (ENSOART00000013831/ENSOARG00000012721, intron 16 of 24)	+	CG	ENSOARG00000012721
3	194154997	194155050	54	-0.578	Intron (ENSOART00000022272/ENSOARG00000020451, intron 15 of 15)	-	CG	ENSOARG00000020451
1	17610514	17610555	42	-0.578	Promoter (2-3kb)	+	CG	ENSOARG00000020497
3	151204924	151204930	7	-0.577	Distal Intergenic	-	CG	ENSOARG00000001039
2	81746054	81746067	14	-0.577	Distal Intergenic	-	CG	ENSOARG00000013861
7	38237550	38237561	12	-0.577	Distal Intergenic	-	CG	ENSOARG00000020597
4	54599022	54599271	250	-0.577	Distal Intergenic	+	CG	ENSOARG00000001892
15	5277797	5277844	48	-0.577	Distal Intergenic	+	CG	ENSOARG00000004790
6	24420173	24420339	167	-0.577	Distal Intergenic	+	CG	ENSOARG00000013694
19	2361624	2361788	165	-0.577	Distal Intergenic	+	CG	ENSOARG00000014502
3	38571983	38572164	182	-0.577	Distal Intergenic	+	CG	ENSOARG00000019784
7	30677888	30678005	118	-0.577	Distal Intergenic	+	CG	ENSOARG00000020022
11	41068061	41068127	67	-0.577	Intron (ENSOART00000017665/ENSOARG00000016218, intron 5 of 6)	-	CG	ENSOARG00000016218
1	86809530	86809635	106	-0.577	Intron (ENSOART00000021163/ENSOARG00000019433, intron 1 of 7)	+	CG	ENSOARG00000019430
14	54791962	54792012	51	-0.577	Promoter (1-2kb)	-	CG	ENSOARG00000012782
2	95466705	95466717	13	-0.576	Distal Intergenic	-	CG	ENSOARG00000008944
4	69614519	69614558	40	-0.576	Distal Intergenic	-	CG	ENSOARG00000010012
18	8701477	8701517	41	-0.576	Distal Intergenic	-	CG	ENSOARG00000010116
2	119488846	119488933	88	-0.576	Distal Intergenic	-	CG	ENSOARG00000016476
3	87347394	87347412	19	-0.576	Distal Intergenic	+	CG	ENSOARG00000010108
2	178809735	178809776	42	-0.576	Distal Intergenic	+	CG	ENSOARG00000011860
3	30822102	30822186	85	-0.576	Distal Intergenic	+	CG	ENSOARG00000017497
6	32950405	32950588	184	-0.576	Distal Intergenic	+	CG	ENSOARG00000018295
4	15343183	15343221	39	-0.576	Intron (ENSOART00000005581/ENSOARG00000005106, intron 5 of 33)	-	CG	ENSOARG00000005106
8	10459680	10459758	79	-0.576	Intron (ENSOART00000008163/ENSOARG00000007496, intron 12 of 12)	-	CG	ENSOARG00000007496
2	126650169	126650267	99	-0.576	Intron (ENSOART00000018307/ENSOARG00000016813, intron 3 of 4)	-	CG	ENSOARG00000016813
3	39795119	39795405	287	-0.575	Distal Intergenic	-	CG	ENSOARG00000019902
1	16470955	16471019	65	-0.575	Distal Intergenic	-	CG	ENSOARG00000020385
21	10205657	10205674	18	-0.575	Distal Intergenic	+	CG	ENSOARG00000005132
2	45501624	45501715	92	-0.575	Distal Intergenic	+	CG	ENSOARG00000010699
3	82603889	82603903	15	-0.575	Distal Intergenic	+	CG	ENSOARG00000016318
1	187471075	187471126	52	-0.575	Distal Intergenic	+	CG	ENSOARG00000020220
4	87078380	87078593	214	-0.575	Intron (ENSOART00000000222/ENSOARG00000000193, intron 23 of 26)	-	CG	ENSOARG00000000193
3	37618775	37618794	20	-0.575	Intron (ENSOART00000021428/ENSOARG00000019676, intron 6 of 14)	-	CG	ENSOARG00000019676
7	44402786	44402796	11	-0.575	Intron (ENSOART00000022667/ENSOARG00000020803, intron 31 of 55)	-	CG	ENSOARG00000020803
26	14631189	14631476	288	-0.574	Distal Intergenic	-	CG	ENSOARG00000008022
X	1075614	1075761	148	-0.574	Distal Intergenic	-	CG	ENSOARG00000008082
4	24073647	24073706	60	-0.574	Distal Intergenic	-	CG	ENSOARG00000008198
4	75356728	75356885	158	-0.574	Distal Intergenic	-	CG	ENSOARG00000012830
6	98237860	98238046	187	-0.574	Distal Intergenic	+	CG	ENSOARG00000003059
25	31539528	31539595	68	-0.574	Distal Intergenic	+	CG	ENSOARG00000009033
8	25112508	25112533	26	-0.574	Distal Intergenic	+	CG	ENSOARG00000009580
26	34438715	34438803	89	-0.574	Intron (ENSOART00000002546/ENSOARG00000002354, intron 6 of 6)	-	CG	ENSOARG00000002354
8	84859053	84859089	37	-0.574	Intron (ENSOART00000005223/ENSOARG00000004794, intron 1 of 1)	+	CG	ENSOARG00000004794
17	67548724	67548860	137	-0.573	Distal Intergenic	-	CG	ENSOARG00000002106
20	31186875	31186944	70	-0.573	Distal Intergenic	-	CG	ENSOARG00000003250
3	108065157	108065169	13	-0.573	Distal Intergenic	-	CG	ENSOARG00000014701
10	63593634	63593917	284	-0.573	Distal Intergenic	+	CG	ENSOARG00000000522
9	50490247	50490305	59	-0.573	Distal Intergenic	+	CG	ENSOARG00000006562
4	98195545	98195553	9	-0.573	Distal Intergenic	+	CG	ENSOARG00000007638
6	109891887	109891927	41	-0.573	Distal Intergenic	+	CG	ENSOARG00000008859
9	69226450	69226474	25	-0.573	Distal Intergenic	+	CG	ENSOARG00000015039
1	266258665	266258753	89	-0.573	Distal Intergenic	+	CG	ENSOARG00000015853
3	157742900	157743013	114	-0.573	Intron (ENSOART00000005069/ENSOARG00000004661, intron 1 of 2)	-	CG	ENSOARG00000017854
3	39639518	39639570	53	-0.573	Intron (ENSOART00000021662/ENSOARG00000019897, intron 1 of 9)	-	CG	ENSOARG00000019893
4	25606863	25606914	52	-0.572	Distal Intergenic	-	CG	ENSOARG00000009122
7	20792485	20792542	58	-0.572	Distal Intergenic	-	CG	ENSOARG00000019263
23	26825918	26825930	13	-0.572	Distal Intergenic	+	CG	ENSOARG00000006831
12	34099710	34099714	5	-0.572	Distal Intergenic	+	CG	ENSOARG00000009100
7	52510407	52510566	160	-0.572	Distal Intergenic	+	CG	ENSOARG00000020912
4	48242074	48242186	113	-0.572	Intron (ENSOART00000005398/ENSOARG00000004957, intron 3 of 10)	+	CG	ENSOARG00000005055
2	21270970	21271211	242	-0.572	Intron (ENSOART00000008115/ENSOARG00000007440, intron 2 of 9)	+	CG	ENSOARG00000007440
13	79352168	79352273	106	-0.572	Intron (ENSOART00000016021/ENSOARG00000014720, intron 3 of 4)	-	CG	ENSOARG00000014720
17	64332205	64332267	63	-0.572	Intron (ENSOART00000019834/ENSOARG00000018227, intron 8 of 9)	-	CG	ENSOARG00000018227
3	65958929	65958940	12	-0.571	Distal Intergenic	-	CG	ENSOARG00000001844
15	48196562	48196589	28	-0.571	Distal Intergenic	-	CG	ENSOARG00000007653
2	151688801	151688818	18	-0.571	Distal Intergenic	-	CG	ENSOARG00000007964
9	67298334	67298354	21	-0.571	Distal Intergenic	-	CG	ENSOARG00000011963
X	26580792	26580878	87	-0.571	Distal Intergenic	-	CG	ENSOARG00000017968
4	10189148	10189156	9	-0.571	Distal Intergenic	-	CG	ENSOARG00000018572
6	5172528	5172544	17	-0.571	Distal Intergenic	+	CG	ENSOARG00000015473
16	571549	571572	24	-0.571	Intron (ENSOART00000003034/ENSOARG00000002790, intron 23 of 31)	-	CG	ENSOARG00000002790
10	1938312	1938385	74	-0.571	Intron (ENSOART00000006793/ENSOARG00000006244, intron 7 of 13)	+	CG	ENSOARG00000006336
4	99184720	99184729	10	-0.571	Intron (ENSOART00000009901/ENSOARG00000009081, intron 15 of 42)	+	CG	ENSOARG00000009081
1	74133002	74133027	26	-0.571	Intron (ENSOART00000019097/ENSOARG00000017549, intron 19 of 22)	-	CG	ENSOARG00000017549
7	51819963	51820145	183	-0.571	Promoter (2-3kb)	+	CG	ENSOARG00000020895
1	223628018	223628380	363	-0.57	Distal Intergenic	-	CG	ENSOARG00000001842
1	242823959	242824146	188	-0.57	Distal Intergenic	-	CG	ENSOARG00000005732
9	22989021	22989225	205	-0.57	Distal Intergenic	-	CG	ENSOARG00000007587
10	86227555	86227574	20	-0.57	Distal Intergenic	-	CG	ENSOARG00000008646
2	162921929	162922060	132	-0.57	Distal Intergenic	-	CG	ENSOARG00000009855
4	104196186	104196217	32	-0.57	Distal Intergenic	-	CG	ENSOARG00000013701
17	60153986	60154000	15	-0.57	Distal Intergenic	+	CG	ENSOARG00000006827
3	126250399	126250410	12	-0.57	Distal Intergenic	-	CG	ENSOARG00000015680
3	163080354	163080434	81	-0.57	Exon (ENSOART00000010824/ENSOARG00000009931, exon 7 of 29)	+	CG	ENSOARG00000009931
13	72010565	72010703	139	-0.57	Intron (ENSOART00000003978/ENSOARG00000003661, intron 1 of 8)	+	CG	ENSOARG00000003661
20	1005537	1005659	123	-0.57	Intron (ENSOART00000006100/ENSOARG00000005603, intron 10 of 10)	-	CG	ENSOARG00000005603
16	61688202	61688244	43	-0.57	Intron (ENSOART00000015087/ENSOARG00000013859, intron 5 of 20)	+	CG	ENSOARG00000013859
19	4236863	4236987	125	-0.57	Intron (ENSOART00000015982/ENSOARG00000014684, intron 4 of 14)	+	CG	ENSOARG00000014684
6	8354062	8354070	9	-0.569	Distal Intergenic	+	CG	ENSOARG00000000262
24	13176768	13176894	127	-0.569	Distal Intergenic	+	CG	ENSOARG00000007471
23	33551349	33551394	46	-0.569	Distal Intergenic	+	CG	ENSOARG00000008070
6	18678837	18678844	8	-0.569	Distal Intergenic	+	CG	ENSOARG00000009048
2	158616991	158617088	98	-0.569	Distal Intergenic	+	CG	ENSOARG00000009320
6	19703234	19703359	126	-0.569	Intron (ENSOART00000011187/ENSOARG00000010289, intron 10 of 12)	+	CG	ENSOARG00000010172
18	56027904	56027955	52	-0.569	Intron (ENSOART00000014100/ENSOARG00000012969, intron 2 of 16)	+	CG	ENSOARG00000012969
9	69848750	69848973	224	-0.569	Intron (ENSOART00000016434/ENSOARG00000015100, intron 6 of 10)	+	CG	ENSOARG00000015100
24	6416398	6416412	15	-0.568	Distal Intergenic	+	CG	ENSOARG00000005135
2	186435780	186435822	43	-0.568	Distal Intergenic	+	CG	ENSOARG00000013396
19	8286969	8286989	21	-0.568	Distal Intergenic	+	CG	ENSOARG00000016185
3	135877510	135877767	258	-0.568	Distal Intergenic	+	CG	ENSOARG00000017839
23	60520352	60520362	11	-0.568	Distal Intergenic	-	CG	ENSOARG00000004048
X	36720469	36720544	76	-0.568	Distal Intergenic	+	CG	ENSOARG00000019235
X	4133324	4133386	63	-0.568	Distal Intergenic	-	CG	ENSOARG00000009380
25	7619131	7619175	45	-0.568	Distal Intergenic	-	CG	ENSOARG00000017793
18	45818682	45818823	142	-0.568	Intron (ENSOART00000008906/ENSOARG00000008179, intron 4 of 8)	+	CG	ENSOARG00000008050
4	24123769	24123950	182	-0.568	Intron (ENSOART00000009008/ENSOARG00000008280, intron 3 of 7)	-	CG	ENSOARG00000008280
5	65731397	65731420	24	-0.568	Intron (ENSOART00000011580/ENSOARG00000010643, intron 4 of 13)	-	CG	ENSOARG00000010643
18	21004483	21004730	248	-0.568	Intron (ENSOART00000014005/ENSOARG00000012875, intron 19 of 20)	-	CG	ENSOARG00000012875
6	90942472	90942477	6	-0.568	Intron (ENSOART00000018701/ENSOARG00000017181, intron 22 of 23)	-	CG	ENSOARG00000017181
1	5050738	5050773	36	-0.568	Intron (ENSOART00000020837/ENSOARG00000019132, intron 9 of 21)	-	CG	ENSOARG00000000331
6	98249156	98249295	140	-0.567	Distal Intergenic	+	CG	ENSOARG00000003059
10	20881035	20881073	39	-0.567	Distal Intergenic	+	CG	ENSOARG00000008823
1	111872921	111873037	117	-0.567	Distal Intergenic	+	CG	ENSOARG00000010597
3	14335646	14335786	141	-0.567	Distal Intergenic	+	CG	ENSOARG00000014575
4	57496296	57496337	42	-0.567	Distal Intergenic	-	CG	ENSOARG00000003374
3	54420294	54420448	155	-0.567	Distal Intergenic	-	CG	ENSOARG00000020397
6	96839773	96839909	137	-0.567	Intron (ENSOART00000000990/ENSOARG00000000926, intron 1 of 5)	-	CG	ENSOARG00000000824
11	7142184	7142202	19	-0.567	Intron (ENSOART00000007194/ENSOARG00000006616, intron 1 of 11)	-	CG	ENSOARG00000006941
22	4578990	4579037	48	-0.567	Intron (ENSOART00000014373/ENSOARG00000013216, intron 2 of 37)	+	CG	ENSOARG00000013216
21	49007654	49007810	157	-0.566	Distal Intergenic	+	CG	ENSOARG00000004989
4	29194708	29194832	125	-0.566	Distal Intergenic	+	CG	ENSOARG00000010027
6	85600820	85600876	57	-0.566	Distal Intergenic	+	CG	ENSOARG00000011393
3	20017873	20018010	138	-0.566	Distal Intergenic	+	CG	ENSOARG00000015751
13	18259793	18259842	50	-0.566	Distal Intergenic	+	CG	ENSOARG00000017485
13	3768909	3768921	13	-0.566	Distal Intergenic	-	CG	ENSOARG00000010523
13	30927239	30927366	128	-0.566	Distal Intergenic	-	CG	ENSOARG00000011498
18	51701318	51701424	107	-0.566	Distal Intergenic	-	CG	ENSOARG00000013830
1	68902953	68903021	69	-0.566	Distal Intergenic	-	CG	ENSOARG00000016329
12	65577239	65577359	121	-0.566	Intron (ENSOART00000007986/ENSOARG00000007338, intron 8 of 12)	+	CG	ENSOARG00000007338
2	244212109	244212132	24	-0.565	Distal Intergenic	+	CG	ENSOARG00000008589
1	40532287	40532296	10	-0.565	Distal Intergenic	+	CG	ENSOARG00000010286
19	50629073	50629114	42	-0.565	Distal Intergenic	+	CG	ENSOARG00000013728
22	8810642	8810660	19	-0.565	Distal Intergenic	+	CG	ENSOARG00000013967
19	2910520	2910624	105	-0.565	Distal Intergenic	+	CG	ENSOARG00000014615
3	156816301	156816403	103	-0.565	Distal Intergenic	-	CG	ENSOARG00000004366
4	25538098	25538205	108	-0.565	Distal Intergenic	-	CG	ENSOARG00000009122
22	33850015	33850100	86	-0.565	Distal Intergenic	-	CG	ENSOARG00000014762
18	16608976	16609009	34	-0.565	Intron (ENSOART00000011692/ENSOARG00000010742, intron 15 of 18)	+	CG	ENSOARG00000010790
16	62080652	62080688	37	-0.565	Intron (ENSOART00000015087/ENSOARG00000013859, intron 15 of 20)	+	CG	ENSOARG00000013884
20	27002608	27002616	9	-0.564	Distal Intergenic	+	CG	ENSOARG00000009395
2	69624174	69624293	120	-0.564	Distal Intergenic	+	CG	ENSOARG00000013265
1	142526549	142526735	187	-0.564	Distal Intergenic	-	CG	ENSOARG00000001203
13	82542970	82543042	73	-0.564	Distal Intergenic	-	CG	ENSOARG00000015335
3	174271705	174271720	16	-0.564	Distal Intergenic	-	CG	ENSOARG00000017296
17	70095565	70095675	111	-0.564	Intron (ENSOART00000013286/ENSOARG00000012208, intron 10 of 16)	-	CG	ENSOARG00000012208
3	117059363	117059370	8	-0.564	Intron (ENSOART00000016530/ENSOARG00000015186, intron 6 of 16)	+	CG	ENSOARG00000015186
3	142742960	142743251	292	-0.564	Intron (ENSOART00000021429/ENSOARG00000019678, intron 2 of 10)	-	CG	ENSOARG00000019678
10	57724988	57725078	91	-0.563	Distal Intergenic	+	CG	ENSOARG00000000468
2	151143108	151143144	37	-0.563	Distal Intergenic	+	CG	ENSOARG00000007774
1	111874923	111875036	114	-0.563	Distal Intergenic	+	CG	ENSOARG00000010597
2	191498573	191498629	57	-0.563	Distal Intergenic	+	CG	ENSOARG00000013621
5	102103634	102103868	235	-0.563	Distal Intergenic	+	CG	ENSOARG00000018734
1	197552389	197552550	162	-0.563	Distal Intergenic	+	CG	ENSOARG00000020487
1	223500823	223500962	140	-0.563	Distal Intergenic	-	CG	ENSOARG00000001842
5	92968548	92968583	36	-0.563	Distal Intergenic	-	CG	ENSOARG00000017599
1	8074701	8074715	15	-0.563	Distal Intergenic	-	CG	ENSOARG00000019362
9	85836062	85836209	148	-0.563	Exon (ENSOART00000010742/ENSOARG00000009869, exon 8 of 8)	-	CG	ENSOARG00000009573
10	23585143	23585169	27	-0.563	Intron (ENSOART00000010687/ENSOARG00000009812, intron 10 of 25)	+	CG	ENSOARG00000009746
1	111271364	111271496	133	-0.563	Intron (ENSOART00000011338/ENSOARG00000010418, intron 7 of 15)	+	CG	ENSOARG00000010418
23	30510928	30510951	24	-0.562	Distal Intergenic	+	CG	ENSOARG00000007007
24	11009086	11009103	18	-0.562	Distal Intergenic	+	CG	ENSOARG00000007193
22	15987037	15987290	254	-0.562	Distal Intergenic	-	CG	ENSOARG00000005814
2	15998890	15998904	15	-0.562	Distal Intergenic	-	CG	ENSOARG00000007213
12	67478325	67478367	43	-0.562	Distal Intergenic	-	CG	ENSOARG00000009207
23	20555731	20555751	21	-0.562	Intron (ENSOART00000005768/ENSOARG00000005294, intron 1 of 6)	+	CG	ENSOARG00000005294
11	61217858	61217869	12	-0.562	Intron (ENSOART00000016964/ENSOARG00000015593, intron 4 of 24)	-	CG	ENSOARG00000015486
4	98427222	98427618	397	-0.561	Distal Intergenic	+	CG	ENSOARG00000007819
21	32567580	32567609	30	-0.561	Distal Intergenic	+	CG	ENSOARG00000013990
1	140920807	140920960	154	-0.561	Distal Intergenic	+	CG	ENSOARG00000016107
3	191512480	191512489	10	-0.561	Distal Intergenic	+	CG	ENSOARG00000020110
13	70865121	70865180	60	-0.561	Distal Intergenic	-	CG	ENSOARG00000003072
18	15161701	15161741	41	-0.561	Intron (ENSOART00000011470/ENSOARG00000010540, intron 12 of 12)	-	CG	ENSOARG00000010540
18	55674089	55674106	18	-0.561	Intron (ENSOART00000013731/ENSOARG00000012626, intron 19 of 20)	-	CG	ENSOARG00000012626
7	316235	316367	133	-0.561	Intron (ENSOART00000017376/ENSOARG00000015958, intron 1 of 1)	+	CG	ENSOARG00000015955
19	10115314	10115353	40	-0.561	Intron (ENSOART00000017888/ENSOARG00000016427, intron 2 of 10)	+	CG	ENSOARG00000016427
24	36908321	36908364	44	-0.561	Intron (ENSOART00000020453/ENSOARG00000018781, intron 4 of 8)	-	CG	ENSOARG00000018731
4	14424296	14424362	67	-0.561	Promoter (<=1kb)	+	CG	ENSOARG00000004581
18	60922343	60922347	5	-0.56	Distal Intergenic	+	CG	ENSOARG00000000106
6	42051355	42051398	44	-0.56	Distal Intergenic	+	CG	ENSOARG00000005505
22	28035654	28035670	17	-0.56	Distal Intergenic	-	CG	ENSOARG00000009016
10	25273054	25273082	29	-0.56	Distal Intergenic	-	CG	ENSOARG00000010389
2	177856017	177856278	262	-0.56	Distal Intergenic	-	CG	ENSOARG00000011685
11	58434190	58434218	29	-0.56	Distal Intergenic	-	CG	ENSOARG00000013779
16	20055283	20055330	48	-0.559	Distal Intergenic	+	CG	ENSOARG00000007210
3	92989705	92989927	223	-0.559	Distal Intergenic	+	CG	ENSOARG00000011353
5	76768413	76768456	44	-0.559	Distal Intergenic	+	CG	ENSOARG00000014250
13	8167299	8167356	58	-0.559	Distal Intergenic	-	CG	ENSOARG00000004386
15	17808288	17808317	30	-0.559	Distal Intergenic	-	CG	ENSOARG00000012541
13	34723083	34723234	152	-0.559	Distal Intergenic	-	CG	ENSOARG00000015113
19	11501061	11501164	104	-0.559	Intron (ENSOART00000000917/ENSOARG00000000853, intron 19 of 36)	-	CG	ENSOARG00000000978
2	239962840	239962850	11	-0.559	Intron (ENSOART00000005966/ENSOARG00000005477, intron 1 of 1)	-	CG	ENSOARG00000005587
8	10666492	10666508	17	-0.559	Intron (ENSOART00000008233/ENSOARG00000007561, intron 16 of 27)	-	CG	ENSOARG00000007561
9	36072525	36072533	9	-0.559	Intron (ENSOART00000016085/ENSOARG00000014778, intron 10 of 11)	-	CG	ENSOARG00000014889
3	146923518	146923672	155	-0.559	Intron (ENSOART00000021772/ENSOARG00000019998, intron 1 of 9)	+	CG	ENSOARG00000019998
14	41850614	41850685	72	-0.558	Distal Intergenic	+	CG	ENSOARG00000004147
23	5551937	5552198	262	-0.558	Distal Intergenic	+	CG	ENSOARG00000004801
2	48805215	48805489	275	-0.558	Distal Intergenic	+	CG	ENSOARG00000011062
12	76672304	76672310	7	-0.558	Distal Intergenic	+	CG	ENSOARG00000015980
3	40092598	40092616	19	-0.558	Distal Intergenic	+	CG	ENSOARG00000019931
2	5789273	5789282	10	-0.558	Distal Intergenic	-	CG	ENSOARG00000005792
2	76199670	76199700	31	-0.558	Distal Intergenic	-	CG	ENSOARG00000013755
2	239915325	239915363	39	-0.558	Intron (ENSOART00000005959/ENSOARG00000005466, intron 7 of 8)	+	CG	ENSOARG00000005466
2	146572686	146573023	338	-0.557	Distal Intergenic	+	CG	ENSOARG00000006362
16	24412130	24412318	189	-0.557	Distal Intergenic	+	CG	ENSOARG00000008055
1	111735760	111735774	15	-0.557	Distal Intergenic	+	CG	ENSOARG00000010597
18	25570839	25570848	10	-0.557	Distal Intergenic	+	CG	ENSOARG00000015492
10	11119253	11119281	29	-0.557	Distal Intergenic	-	CG	ENSOARG00000006710
6	87163488	87163724	237	-0.557	Intron (ENSOART00000014359/ENSOARG00000013204, intron 18 of 21)	+	CG	ENSOARG00000013094
23	18449690	18449890	201	-0.556	Distal Intergenic	+	CG	ENSOARG00000005276
21	25303489	25303528	40	-0.556	Distal Intergenic	+	CG	ENSOARG00000009168
18	4272922	4273071	150	-0.556	Distal Intergenic	+	CG	ENSOARG00000009373
16	36317734	36317785	52	-0.556	Distal Intergenic	+	CG	ENSOARG00000010157
5	75055572	75055718	147	-0.556	Distal Intergenic	+	CG	ENSOARG00000014250
8	67000645	67000655	11	-0.556	Distal Intergenic	-	CG	ENSOARG00000001505
13	76162416	76162453	38	-0.556	Distal Intergenic	-	CG	ENSOARG00000010543
4	34040320	34040471	152	-0.556	Distal Intergenic	-	CG	ENSOARG00000014964
25	42930593	42930617	25	-0.556	Intron (ENSOART00000002012/ENSOARG00000001870, intron 5 of 6)	-	CG	ENSOARG00000001870
4	95943286	95943313	28	-0.556	Intron (ENSOART00000007014/ENSOARG00000006427, intron 29 of 36)	-	CG	ENSOARG00000006427
8	5757939	5757949	11	-0.556	Intron (ENSOART00000007513/ENSOARG00000006899, intron 25 of 34)	-	CG	ENSOARG00000006899
9	22756637	22756645	9	-0.556	Intron (ENSOART00000008121/ENSOARG00000007455, intron 3 of 20)	+	CG	ENSOARG00000007455
12	17228202	17228396	195	-0.556	Intron (ENSOART00000011686/ENSOARG00000010714, intron 24 of 74)	+	CG	ENSOARG00000010181
20	20784996	20785043	48	-0.556	Intron (ENSOART00000012776/ENSOARG00000011748, intron 6 of 7)	+	CG	ENSOARG00000011753
3	135917979	135918124	146	-0.556	Promoter (<=1kb)	+	CG	ENSOARG00000017839
3	116843872	116844078	207	-0.556	Promoter (2-3kb)	-	CG	ENSOARG00000015171
10	65866143	65866249	107	-0.555	Distal Intergenic	+	CG	ENSOARG00000000553
4	54587035	54587071	37	-0.555	Distal Intergenic	+	CG	ENSOARG00000001892
19	32116961	32117106	146	-0.555	Distal Intergenic	+	CG	ENSOARG00000009914
3	166098392	166098596	205	-0.555	Distal Intergenic	+	CG	ENSOARG00000012759
6	24210743	24211117	375	-0.555	Distal Intergenic	+	CG	ENSOARG00000013694
1	77065956	77065992	37	-0.555	Distal Intergenic	+	CG	ENSOARG00000018242
12	65829939	65830108	170	-0.555	Distal Intergenic	-	CG	ENSOARG00000007592
16	34084359	34084635	277	-0.555	Distal Intergenic	-	CG	ENSOARG00000009401
21	33955023	33955029	7	-0.555	Distal Intergenic	-	CG	ENSOARG00000014132
4	117951606	117951667	62	-0.555	Intron (ENSOART00000008030/ENSOARG00000007377, intron 18 of 23)	+	CG	ENSOARG00000007377
16	65690250	65690328	79	-0.555	Intron (ENSOART00000016014/ENSOARG00000014702, intron 23 of 24)	-	CG	ENSOARG00000014702
5	81460075	81460268	194	-0.555	Intron (ENSOART00000017115/ENSOARG00000015724, intron 9 of 10)	-	CG	ENSOARG00000015724
1	256564848	256564987	140	-0.554	Distal Intergenic	+	CG	ENSOARG00000009221
4	102793001	102793006	6	-0.554	Distal Intergenic	+	CG	ENSOARG00000011618
13	13792854	13792860	7	-0.554	Distal Intergenic	+	CG	ENSOARG00000014052
15	43779623	43779661	39	-0.554	Distal Intergenic	+	CG	ENSOARG00000014993
13	68677207	68677211	5	-0.554	Distal Intergenic	-	CG	ENSOARG00000001355
6	112096122	112096141	20	-0.554	Distal Intergenic	-	CG	ENSOARG00000010350
13	65452716	65452737	22	-0.554	Intron (ENSOART00000017739/ENSOARG00000016281, intron 18 of 18)	-	CG	ENSOARG00000016281
3	83798185	83798792	608	-0.553	Distal Intergenic	+	CG	ENSOARG00000007679
1	122730157	122730177	21	-0.553	Distal Intergenic	+	CG	ENSOARG00000007911
12	21110795	21110818	24	-0.553	Distal Intergenic	+	CG	ENSOARG00000011659
16	52582471	52582533	63	-0.553	Distal Intergenic	-	CG	ENSOARG00000005738
1	235617683	235617767	85	-0.553	Intron (ENSOART00000004910/ENSOARG00000004511, intron 5 of 13)	-	CG	ENSOARG00000004511
18	5148123	5148128	6	-0.553	Intron (ENSOART00000010573/ENSOARG00000009711, intron 1 of 16)	+	CG	ENSOARG00000009711
10	69261713	69261959	247	-0.552	Distal Intergenic	+	CG	ENSOARG00000000573
13	16416566	16416731	166	-0.552	Distal Intergenic	+	CG	ENSOARG00000015405
1	166221103	166221204	102	-0.552	Distal Intergenic	+	CG	ENSOARG00000018697
3	203752057	203752086	30	-0.552	Distal Intergenic	+	CG	ENSOARG00000020919
20	32121326	32121501	176	-0.552	Distal Intergenic	-	CG	ENSOARG00000006546
20	43319063	43319108	46	-0.552	Distal Intergenic	-	CG	ENSOARG00000014356
3	110915788	110915866	79	-0.552	Distal Intergenic	-	CG	ENSOARG00000014737
3	27478152	27478194	43	-0.552	Distal Intergenic	-	CG	ENSOARG00000016954
15	50132761	50133003	243	-0.552	Intron (ENSOART00000005764/ENSOARG00000005285, intron 11 of 16)	-	CG	ENSOARG00000005031
5	43568315	43568326	12	-0.552	Intron (ENSOART00000015378/ENSOARG00000014111, intron 9 of 22)	+	CG	ENSOARG00000014306
5	83360350	83360368	19	-0.551	Distal Intergenic	+	CG	ENSOARG00000015801
5	99610728	99610786	59	-0.551	Distal Intergenic	+	CG	ENSOARG00000018607
3	200100033	200100047	15	-0.551	Distal Intergenic	+	CG	ENSOARG00000020776
X	39080578	39080656	79	-0.551	Distal Intergenic	-	CG	ENSOARG00000002735
14	40926724	40926749	26	-0.551	Distal Intergenic	-	CG	ENSOARG00000004125
2	5632464	5632504	41	-0.551	Distal Intergenic	-	CG	ENSOARG00000005792
10	10920522	10920542	21	-0.551	Distal Intergenic	-	CG	ENSOARG00000006710
6	110777669	110777688	20	-0.551	Distal Intergenic	-	CG	ENSOARG00000009911
20	37579495	37579589	95	-0.551	Distal Intergenic	-	CG	ENSOARG00000010155
8	53962801	53962854	54	-0.551	Distal Intergenic	-	CG	ENSOARG00000013550
5	81006407	81006516	110	-0.551	Distal Intergenic	-	CG	ENSOARG00000015677
16	67802329	67802336	8	-0.551	Intron (ENSOART00000016814/ENSOARG00000015446, intron 14 of 22)	-	CG	ENSOARG00000015446
20	45026127	45026143	17	-0.551	Intron (ENSOART00000018047/ENSOARG00000016571, intron 5 of 17)	+	CG	ENSOARG00000016571
7	84384035	84384117	83	-0.55	Distal Intergenic	+	CG	ENSOARG00000002105
21	6347079	6347085	7	-0.55	Distal Intergenic	+	CG	ENSOARG00000003973
2	29719835	29719881	47	-0.55	Distal Intergenic	+	CG	ENSOARG00000008514
12	56512554	56512594	41	-0.55	Distal Intergenic	+	CG	ENSOARG00000015336
12	58181323	58181453	131	-0.55	Distal Intergenic	+	CG	ENSOARG00000016177
19	8441649	8441712	64	-0.55	Distal Intergenic	+	CG	ENSOARG00000016185
5	57624920	57625193	274	-0.55	Distal Intergenic	-	CG	ENSOARG00000004789
6	43660499	43660510	12	-0.55	Distal Intergenic	-	CG	ENSOARG00000005581
13	9921255	9921351	97	-0.55	Distal Intergenic	-	CG	ENSOARG00000011950
2	217980190	217980277	88	-0.55	Distal Intergenic	-	CG	ENSOARG00000019426
23	57864324	57864337	14	-0.55	Intron (ENSOART00000006025/ENSOARG00000005525, intron 1 of 16)	+	CG	ENSOARG00000005525
2	131213754	131213852	99	-0.55	Intron (ENSOART00000018927/ENSOARG00000017378, intron 9 of 19)	+	CG	ENSOARG00000019620
3	186880161	186880435	275	-0.55	Intron (ENSOART00000021458/ENSOARG00000019704, intron 4 of 7)	-	CG	ENSOARG00000019704
8	68561199	68561218	20	-0.549	Distal Intergenic	+	CG	ENSOARG00000001786
19	30680783	30680959	177	-0.549	Distal Intergenic	+	CG	ENSOARG00000009693
19	8870789	8870852	64	-0.549	Distal Intergenic	+	CG	ENSOARG00000016371
3	15473682	15473895	214	-0.549	Distal Intergenic	+	CG	ENSOARG00000019363
7	96326942	96326976	35	-0.549	Distal Intergenic	-	CG	ENSOARG00000003058
1	247081763	247081869	107	-0.549	Distal Intergenic	-	CG	ENSOARG00000006912
2	151400901	151400994	94	-0.549	Distal Intergenic	-	CG	ENSOARG00000007945
2	225217185	225217223	39	-0.549	Distal Intergenic	-	CG	ENSOARG00000020413
19	10696192	10696196	5	-0.548	3' UTR	+	CG	ENSOARG00000000094
15	70779208	70779235	28	-0.548	Distal Intergenic	+	CG	ENSOARG00000000187
5	53394341	53394353	13	-0.548	Distal Intergenic	+	CG	ENSOARG00000002202
11	3513657	3514073	417	-0.548	Distal Intergenic	+	CG	ENSOARG00000013605
2	191305572	191305601	30	-0.548	Distal Intergenic	+	CG	ENSOARG00000013621
19	20147052	20147068	17	-0.548	Distal Intergenic	+	CG	ENSOARG00000014064
13	44990584	44990793	210	-0.548	Distal Intergenic	+	CG	ENSOARG00000014235
3	129402503	129402772	270	-0.548	Distal Intergenic	+	CG	ENSOARG00000015830
4	82668203	82668301	99	-0.548	Distal Intergenic	+	CG	ENSOARG00000017923
3	221254761	221254778	18	-0.548	Distal Intergenic	+	CG	ENSOARG00000019581
1	190297203	190297515	313	-0.548	Distal Intergenic	+	CG	ENSOARG00000020386
1	204524259	204524491	233	-0.548	Distal Intergenic	+	CG	ENSOARG00000020678
8	798662	798668	7	-0.548	Distal Intergenic	-	CG	ENSOARG00000006317
2	159255520	159255546	27	-0.548	Distal Intergenic	-	CG	ENSOARG00000009420
2	119455273	119455288	16	-0.548	Distal Intergenic	-	CG	ENSOARG00000016476
1	145937501	145937558	58	-0.548	Distal Intergenic	-	CG	ENSOARG00000016827
2	215839526	215839570	45	-0.548	Distal Intergenic	-	CG	ENSOARG00000019275
9	79861509	79861587	79	-0.548	Intron (ENSOART00000005156/ENSOARG00000004737, intron 4 of 6)	-	CG	ENSOARG00000004737
20	31675313	31675536	224	-0.548	Intron (ENSOART00000005292/ENSOARG00000004854, intron 14 of 16)	-	CG	ENSOARG00000005104
16	20118494	20118852	359	-0.548	Intron (ENSOART00000007844/ENSOARG00000007210, intron 1 of 14)	+	CG	ENSOARG00000007210
5	16726340	16726419	80	-0.548	Intron (ENSOART00000009136/ENSOARG00000008388, intron 16 of 23)	-	CG	ENSOARG00000008388
8	26604965	26605006	42	-0.548	Intron (ENSOART00000010849/ENSOARG00000009968, intron 1 of 12)	+	CG	ENSOARG00000009968
4	48093997	48094110	114	-0.547	Distal Intergenic	+	CG	ENSOARG00000004957
9	20685932	20685956	25	-0.547	Distal Intergenic	+	CG	ENSOARG00000005371
X	6695708	6695728	21	-0.547	Distal Intergenic	+	CG	ENSOARG00000009866
4	50161777	50161954	178	-0.547	Distal Intergenic	-	CG	ENSOARG00000008339
16	36271290	36271582	293	-0.547	Distal Intergenic	-	CG	ENSOARG00000010082
X	97887889	97887918	30	-0.547	Distal Intergenic	-	CG	ENSOARG00000012730
3	150639343	150639427	85	-0.547	Distal Intergenic	-	CG	ENSOARG00000020532
17	39441312	39441366	55	-0.547	Exon (ENSOART00000002506/ENSOARG00000002302, exon 11 of 30)	-	CG	ENSOARG00000002302
13	38919917	38920013	97	-0.547	Intron (ENSOART00000002784/ENSOARG00000002561, intron 23 of 26)	+	CG	ENSOARG00000003093
12	67279412	67279513	102	-0.547	Intron (ENSOART00000009667/ENSOARG00000008871, intron 4 of 20)	+	CG	ENSOARG00000008871
18	4627069	4627220	152	-0.547	Intron (ENSOART00000010343/ENSOARG00000009485, intron 29 of 35)	-	CG	ENSOARG00000009485
22	43081033	43081045	13	-0.547	Intron (ENSOART00000011224/ENSOARG00000010316, intron 7 of 7)	+	CG	ENSOARG00000010316
12	56184678	56184698	21	-0.547	Intron (ENSOART00000016529/ENSOARG00000015182, intron 8 of 21)	-	CG	ENSOARG00000015182
1	104464597	104464644	48	-0.546	Distal Intergenic	+	CG	ENSOARG00000004864
13	26481355	26481466	112	-0.546	Distal Intergenic	+	CG	ENSOARG00000005206
3	167409151	167409170	20	-0.546	Distal Intergenic	+	CG	ENSOARG00000012899
1	30026906	30027013	108	-0.546	Distal Intergenic	-	CG	ENSOARG00000007811
2	26901378	26901396	19	-0.546	Distal Intergenic	-	CG	ENSOARG00000007870
13	76603475	76603699	225	-0.546	Distal Intergenic	-	CG	ENSOARG00000010543
9	36085695	36085757	63	-0.546	Distal Intergenic	-	CG	ENSOARG00000014889
5	6092013	6092034	22	-0.546	Distal Intergenic	-	CG	ENSOARG00000018723
11	13589119	13589134	16	-0.546	Intron (ENSOART00000003627/ENSOARG00000003338, intron 5 of 8)	-	CG	ENSOARG00000003338
23	29240509	29240531	23	-0.546	Intron (ENSOART00000007509/ENSOARG00000006907, intron 13 of 13)	+	CG	ENSOARG00000003873
8	20929965	20930267	303	-0.546	Intron (ENSOART00000009819/ENSOARG00000009014, intron 2 of 13)	+	CG	ENSOARG00000008964
4	27513316	27513332	17	-0.546	Intron (ENSOART00000010499/ENSOARG00000009641, intron 16 of 19)	+	CG	ENSOARG00000009641
4	97457359	97457433	75	-0.545	Distal Intergenic	+	CG	ENSOARG00000006833
6	49267695	49267772	78	-0.545	Distal Intergenic	+	CG	ENSOARG00000009059
1	5618917	5618925	9	-0.545	Distal Intergenic	+	CG	ENSOARG00000019151
6	82270481	82270603	123	-0.545	Distal Intergenic	-	CG	ENSOARG00000006685
2	45572104	45572215	112	-0.545	Distal Intergenic	-	CG	ENSOARG00000010719
8	17757114	17757304	191	-0.545	Distal Intergenic	-	CG	ENSOARG00000019969
25	45240825	45240890	66	-0.545	Intron (ENSOART00000003301/ENSOARG00000003046, intron 6 of 7)	-	CG	ENSOARG00000003046
12	55440267	55440318	52	-0.545	Intron (ENSOART00000015643/ENSOARG00000014362, intron 17 of 17)	-	CG	ENSOARG00000014362
15	63886043	63886132	90	-0.545	Promoter (<=1kb)	+	CG	ENSOARG00000018809
2	150836899	150836917	19	-0.544	Distal Intergenic	+	CG	ENSOARG00000007733
26	19394578	19394701	124	-0.544	Distal Intergenic	+	CG	ENSOARG00000009626
2	5628915	5628948	34	-0.544	Distal Intergenic	-	CG	ENSOARG00000005792
1	257754052	257754205	154	-0.544	Distal Intergenic	-	CG	ENSOARG00000009805
18	8456772	8456831	60	-0.544	Distal Intergenic	-	CG	ENSOARG00000010116
1	6057651	6057811	161	-0.544	Distal Intergenic	-	CG	ENSOARG00000019157
3	47326070	47326131	62	-0.544	Distal Intergenic	-	CG	ENSOARG00000020283
2	101410130	101410167	38	-0.544	Intron (ENSOART00000016229/ENSOARG00000014910, intron 14 of 15)	+	CG	ENSOARG00000014910
11	41544655	41544801	147	-0.544	Intron (ENSOART00000019408/ENSOARG00000017829, intron 9 of 28)	-	CG	ENSOARG00000017784
3	206072669	206072680	12	-0.544	Promoter (<=1kb)	+	CG	ENSOARG00000002095
10	77337546	77337673	128	-0.544	Promoter (1-2kb)	+	CG	ENSOARG00000004848
26	27388907	27388917	11	-0.543	Distal Intergenic	+	CG	ENSOARG00000000229
21	41493176	41493267	92	-0.543	Distal Intergenic	+	CG	ENSOARG00000003377
8	48647698	48647770	73	-0.543	Distal Intergenic	+	CG	ENSOARG00000019995
15	6314903	6314932	30	-0.543	Distal Intergenic	-	CG	ENSOARG00000006859
8	7852443	7852500	58	-0.543	Distal Intergenic	-	CG	ENSOARG00000007195
15	13015367	13015377	11	-0.543	Distal Intergenic	-	CG	ENSOARG00000008312
17	46419817	46419988	172	-0.543	Distal Intergenic	-	CG	ENSOARG00000016263
17	64446622	64446734	113	-0.543	Distal Intergenic	-	CG	ENSOARG00000018227
15	1438350	1438596	247	-0.543	Intron (ENSOART00000003079/ENSOARG00000002844, intron 2 of 12)	+	CG	ENSOARG00000002713
16	3132541	3132750	210	-0.543	Intron (ENSOART00000003730/ENSOARG00000003427, intron 22 of 27)	+	CG	ENSOARG00000003533
9	17174477	17174484	8	-0.543	Intron (ENSOART00000005030/ENSOARG00000004606, intron 68 of 78)	+	CG	ENSOARG00000004943
3	80747273	80747401	129	-0.543	Intron (ENSOART00000007707/ENSOARG00000007081, intron 28 of 37)	+	CG	ENSOARG00000007191
1	50282392	50282426	35	-0.543	Intron (ENSOART00000013397/ENSOARG00000012319, intron 21 of 23)	-	CG	ENSOARG00000012407
16	65677774	65677797	24	-0.543	Intron (ENSOART00000016014/ENSOARG00000014702, intron 23 of 24)	-	CG	ENSOARG00000014702
3	121953707	121953726	20	-0.543	Intron (ENSOART00000016746/ENSOARG00000015393, intron 1 of 1)	-	CG	ENSOARG00000015393
1	74115000	74115028	29	-0.543	Intron (ENSOART00000019097/ENSOARG00000017549, intron 18 of 22)	-	CG	ENSOARG00000017549
16	21806277	21806395	119	-0.542	Distal Intergenic	+	CG	ENSOARG00000005532
15	37262075	37262135	61	-0.542	Distal Intergenic	+	CG	ENSOARG00000006267
10	84315092	84315112	21	-0.542	Distal Intergenic	+	CG	ENSOARG00000006515
4	19041400	19041475	76	-0.542	Distal Intergenic	+	CG	ENSOARG00000006587
3	173112280	173112351	72	-0.542	Distal Intergenic	+	CG	ENSOARG00000016886
7	92858460	92858647	188	-0.542	Distal Intergenic	+	CG	ENSOARG00000017560
13	69899730	69899742	13	-0.542	Distal Intergenic	-	CG	ENSOARG00000002597
X	30399805	30399961	157	-0.542	Distal Intergenic	-	CG	ENSOARG00000018404
1	261136525	261136536	12	-0.542	Intron (ENSOART00000011885/ENSOARG00000010926, intron 1 of 11)	-	CG	ENSOARG00000010926
20	19532005	19532055	51	-0.542	Promoter (2-3kb)	-	CG	ENSOARG00000010568
6	9508822	9508985	164	-0.541	Distal Intergenic	+	CG	ENSOARG00000000275
6	99934136	99934143	8	-0.541	Distal Intergenic	+	CG	ENSOARG00000003828
10	83128134	83128216	83	-0.541	Distal Intergenic	+	CG	ENSOARG00000005617
2	11863835	11864149	315	-0.541	Distal Intergenic	+	CG	ENSOARG00000006659
19	41217167	41217178	12	-0.541	Distal Intergenic	+	CG	ENSOARG00000014113
21	9945744	9945873	130	-0.541	Distal Intergenic	-	CG	ENSOARG00000005079
15	9091476	9091511	36	-0.541	Distal Intergenic	-	CG	ENSOARG00000007969
6	107605516	107605577	62	-0.541	Distal Intergenic	-	CG	ENSOARG00000008320
4	71851347	71851368	22	-0.541	Distal Intergenic	-	CG	ENSOARG00000011063
8	38217115	38217120	6	-0.541	Distal Intergenic	-	CG	ENSOARG00000019980
24	3432240	3432420	181	-0.541	Exon (ENSOART00000003335/ENSOARG00000003074, exon 6 of 10)	-	CG	ENSOARG00000003074
18	30476242	30476525	284	-0.541	Intron (ENSOART00000001542/ENSOARG00000001439, intron 7 of 10)	+	CG	ENSOARG00000001439
19	14002501	14002561	61	-0.541	Intron (ENSOART00000003258/ENSOARG00000002993, intron 5 of 36)	+	CG	ENSOARG00000002885
17	41526699	41526973	275	-0.541	Intron (ENSOART00000006766/ENSOARG00000006222, intron 4 of 15)	-	CG	ENSOARG00000004530
21	19632176	19632352	177	-0.541	Intron (ENSOART00000008138/ENSOARG00000007473, intron 7 of 9)	-	CG	ENSOARG00000007473
22	42455728	42455735	8	-0.541	Intron (ENSOART00000010530/ENSOARG00000009670, intron 10 of 14)	-	CG	ENSOARG00000009670
1	272318546	272318611	66	-0.541	Intron (ENSOART00000016940/ENSOARG00000015558, intron 10 of 21)	-	CG	ENSOARG00000015558
20	45144979	45144986	8	-0.541	Intron (ENSOART00000018047/ENSOARG00000016571, intron 15 of 17)	+	CG	ENSOARG00000016571
6	66825569	66825605	37	-0.541	Intron (ENSOART00000018516/ENSOARG00000017000, intron 10 of 17)	-	CG	ENSOARG00000016822
2	217045548	217045601	54	-0.541	Intron (ENSOART00000021073/ENSOARG00000019350, intron 1 of 7)	-	CG	ENSOARG00000019346
9	18079688	18079906	219	-0.54	Distal Intergenic	+	CG	ENSOARG00000004943
26	4049495	4049516	22	-0.54	Distal Intergenic	+	CG	ENSOARG00000006183
8	3754807	3754829	23	-0.54	Distal Intergenic	+	CG	ENSOARG00000006767
X	48985264	48985291	28	-0.54	Distal Intergenic	+	CG	ENSOARG00000007102
14	8504931	8504997	67	-0.54	Distal Intergenic	+	CG	ENSOARG00000009566
1	63759097	63759136	40	-0.54	Distal Intergenic	+	CG	ENSOARG00000014936
10	54697353	54697358	6	-0.54	Distal Intergenic	-	CG	ENSOARG00000000372
6	12833315	12833490	176	-0.54	Distal Intergenic	-	CG	ENSOARG00000000537
18	30517110	30517191	82	-0.54	Distal Intergenic	-	CG	ENSOARG00000001476
20	21855162	21855169	8	-0.54	Distal Intergenic	-	CG	ENSOARG00000012068
25	5267739	5267947	209	-0.54	Intron (ENSOART00000003617/ENSOARG00000003327, intron 7 of 22)	-	CG	ENSOARG00000003327
23	7295736	7295879	144	-0.54	Intron (ENSOART00000005338/ENSOARG00000004884, intron 46 of 48)	+	CG	ENSOARG00000004958
22	32177810	32177892	83	-0.54	Intron (ENSOART00000013314/ENSOARG00000012244, intron 8 of 8)	+	CG	ENSOARG00000012282
6	23818057	23818080	24	-0.54	Intron (ENSOART00000014826/ENSOARG00000013623, intron 7 of 12)	+	CG	ENSOARG00000013623
5	12867261	12867306	46	-0.54	Intron (ENSOART00000018605/ENSOARG00000017083, intron 4 of 11)	+	CG	ENSOARG00000017083
1	170814203	170814291	89	-0.54	Intron (ENSOART00000020507/ENSOARG00000018829, intron 2 of 16)	+	CG	ENSOARG00000018866
1	201908165	201908169	5	-0.54	Intron (ENSOART00000022501/ENSOARG00000020653, intron 1 of 34)	+	CG	ENSOARG00000020653
23	59674682	59674699	18	-0.539	Distal Intergenic	+	CG	ENSOARG00000005851
1	107311897	107311905	9	-0.539	Distal Intergenic	+	CG	ENSOARG00000007307
26	19080557	19080581	25	-0.539	Distal Intergenic	+	CG	ENSOARG00000009585
2	182660425	182660512	88	-0.539	Distal Intergenic	+	CG	ENSOARG00000012303
16	56840913	56840925	13	-0.539	Distal Intergenic	+	CG	ENSOARG00000013092
3	182804902	182805117	216	-0.539	Distal Intergenic	+	CG	ENSOARG00000019402
8	50603396	50603409	14	-0.539	Distal Intergenic	+	CG	ENSOARG00000020012
7	70243114	70243272	159	-0.539	Distal Intergenic	-	CG	ENSOARG00000000958
17	7659879	7660175	297	-0.539	Distal Intergenic	-	CG	ENSOARG00000006787
15	8014028	8014084	57	-0.539	Distal Intergenic	-	CG	ENSOARG00000007560
6	97902517	97902537	21	-0.539	Intron (ENSOART00000003316/ENSOARG00000003059, intron 1 of 11)	+	CG	ENSOARG00000003059
15	4078554	4078774	221	-0.539	Intron (ENSOART00000003570/ENSOARG00000003293, intron 3 of 6)	-	CG	ENSOARG00000016917
13	27481781	27481803	23	-0.539	Intron (ENSOART00000007084/ENSOARG00000006514, intron 16 of 23)	+	CG	ENSOARG00000006243
18	44217420	44217441	22	-0.539	Intron (ENSOART00000007796/ENSOARG00000007160, intron 7 of 14)	+	CG	ENSOARG00000007160
3	150715839	150715913	75	-0.538	Distal Intergenic	+	CG	ENSOARG00000000155
6	48320753	48320779	27	-0.538	Distal Intergenic	+	CG	ENSOARG00000008992
X	4561007	4561059	53	-0.538	Distal Intergenic	+	CG	ENSOARG00000009563
1	275459025	275459073	49	-0.538	Distal Intergenic	-	CG	ENSOARG00000015824
1	171236959	171237013	55	-0.538	Intron (ENSOART00000020549/ENSOARG00000018871, intron 7 of 8)	-	CG	ENSOARG00000018871
26	1477534	1477543	10	-0.537	Distal Intergenic	+	CG	ENSOARG00000005748
11	6202082	6202212	131	-0.537	Distal Intergenic	+	CG	ENSOARG00000005965
4	73491318	73491493	176	-0.537	Distal Intergenic	+	CG	ENSOARG00000011886
13	12698150	12698311	162	-0.537	Distal Intergenic	+	CG	ENSOARG00000013941
1	123500826	123500882	57	-0.537	Distal Intergenic	+	CG	ENSOARG00000014233
6	89508514	89508724	211	-0.537	Distal Intergenic	+	CG	ENSOARG00000015234
19	9215129	9215137	9	-0.537	Distal Intergenic	+	CG	ENSOARG00000016371
3	45643128	45643180	53	-0.537	Distal Intergenic	+	CG	ENSOARG00000020133
3	198597586	198597727	142	-0.537	Distal Intergenic	+	CG	ENSOARG00000020595
10	54415620	54415674	55	-0.537	Distal Intergenic	-	CG	ENSOARG00000000201
22	19225153	19225196	44	-0.537	Distal Intergenic	-	CG	ENSOARG00000012216
3	111792646	111792652	7	-0.537	Distal Intergenic	-	CG	ENSOARG00000016700
25	42167657	42167706	50	-0.537	Intron (ENSOART00000001515/ENSOARG00000001405, intron 1 of 28)	-	CG	ENSOARG00000001287
6	23748148	23748325	178	-0.537	Intron (ENSOART00000014826/ENSOARG00000013623, intron 1 of 12)	+	CG	ENSOARG00000013623
1	266570201	266570232	32	-0.537	Intron (ENSOART00000015142/ENSOARG00000013878, intron 13 of 35)	+	CG	ENSOARG00000013878
23	59869221	59869227	7	-0.536	Distal Intergenic	+	CG	ENSOARG00000005851
6	76204875	76205019	145	-0.536	Distal Intergenic	+	CG	ENSOARG00000005854
2	170202846	170203057	212	-0.536	Distal Intergenic	+	CG	ENSOARG00000010178
5	64494522	64494560	39	-0.536	Distal Intergenic	+	CG	ENSOARG00000010512
7	13285500	13285515	16	-0.536	Distal Intergenic	+	CG	ENSOARG00000018258
26	28569255	28569470	216	-0.536	Distal Intergenic	-	CG	ENSOARG00000000487
14	61339760	61339768	9	-0.536	Distal Intergenic	-	CG	ENSOARG00000003440
22	26966682	26967009	328	-0.536	Distal Intergenic	-	CG	ENSOARG00000008709
5	33618423	33618431	9	-0.536	Distal Intergenic	-	CG	ENSOARG00000016669
18	20629628	20629642	15	-0.536	Distal Intergenic	-	CG	ENSOARG00000017437
6	36516338	36516569	232	-0.536	Intron (ENSOART00000002064/ENSOARG00000001914, intron 1 of 15)	+	CG	ENSOARG00000001914
13	72062736	72062834	99	-0.536	Intron (ENSOART00000003978/ENSOARG00000003661, intron 2 of 8)	+	CG	ENSOARG00000003661
25	136303	136400	98	-0.535	Distal Intergenic	+	CG	ENSOARG00000003025
25	36041859	36041970	112	-0.535	Distal Intergenic	+	CG	ENSOARG00000010332
1	111815397	111815823	427	-0.535	Distal Intergenic	+	CG	ENSOARG00000010597
13	8988152	8988243	92	-0.535	Distal Intergenic	+	CG	ENSOARG00000011620
6	89121066	89121080	15	-0.535	Distal Intergenic	+	CG	ENSOARG00000015052
3	36980461	36980631	171	-0.535	Distal Intergenic	+	CG	ENSOARG00000019636
1	179758254	179758360	107	-0.535	Distal Intergenic	-	CG	ENSOARG00000001876
1	28677706	28677719	14	-0.535	Distal Intergenic	-	CG	ENSOARG00000007224
8	19956497	19956549	53	-0.535	Distal Intergenic	-	CG	ENSOARG00000008638
X	82850705	82850723	19	-0.535	Distal Intergenic	-	CG	ENSOARG00000009673
2	162906195	162906229	35	-0.535	Distal Intergenic	-	CG	ENSOARG00000009855
10	30354487	30354495	9	-0.535	Distal Intergenic	-	CG	ENSOARG00000011856
3	40978587	40978596	10	-0.535	Distal Intergenic	-	CG	ENSOARG00000019948
17	3943246	3943252	7	-0.535	Intron (ENSOART00000002585/ENSOARG00000002381, intron 32 of 37)	-	CG	ENSOARG00000015044
2	164903670	164903758	89	-0.535	Intron (ENSOART00000010769/ENSOARG00000009898, intron 5 of 10)	-	CG	ENSOARG00000019688
11	45794144	45794149	6	-0.535	Intron (ENSOART00000012896/ENSOARG00000011855, intron 11 of 13)	+	CG	ENSOARG00000011927
22	21714888	21715020	133	-0.535	Intron (ENSOART00000018510/ENSOARG00000016996, intron 10 of 16)	-	CG	ENSOARG00000016996
4	15010681	15010759	79	-0.535	Promoter (2-3kb)	-	CG	ENSOARG00000004686
10	67328349	67328365	17	-0.534	Distal Intergenic	+	CG	ENSOARG00000000553
8	75362144	75362227	84	-0.534	Distal Intergenic	+	CG	ENSOARG00000003344
17	42475208	42475257	50	-0.534	Distal Intergenic	+	CG	ENSOARG00000006586
26	13299164	13299199	36	-0.534	Distal Intergenic	+	CG	ENSOARG00000007367
21	36434967	36435010	44	-0.534	Distal Intergenic	+	CG	ENSOARG00000015752
3	22093610	22093775	166	-0.534	Distal Intergenic	+	CG	ENSOARG00000016287
3	40196403	40196448	46	-0.534	Distal Intergenic	+	CG	ENSOARG00000019931
10	10924376	10924423	48	-0.534	Distal Intergenic	-	CG	ENSOARG00000006710
6	99276395	99276412	18	-0.534	Intron (ENSOART00000003780/ENSOARG00000003468, intron 68 of 69)	-	CG	ENSOARG00000003468
16	9934880	9934941	62	-0.534	Intron (ENSOART00000005733/ENSOARG00000005258, intron 10 of 16)	-	CG	ENSOARG00000005258
4	95896577	95896876	300	-0.534	Intron (ENSOART00000007014/ENSOARG00000006427, intron 28 of 36)	-	CG	ENSOARG00000006427
16	46497609	46497635	27	-0.534	Intron (ENSOART00000013820/ENSOARG00000012712, intron 2 of 12)	+	CG	ENSOARG00000012712
3	64066373	64066592	220	-0.533	Distal Intergenic	+	CG	ENSOARG00000001663
23	2716820	2716830	11	-0.533	Distal Intergenic	+	CG	ENSOARG00000004542
26	6288010	6288064	55	-0.533	Distal Intergenic	+	CG	ENSOARG00000006596
2	21010730	21010743	14	-0.533	Distal Intergenic	+	CG	ENSOARG00000007440
8	33358316	33358499	184	-0.533	Distal Intergenic	+	CG	ENSOARG00000011435
12	35908503	35908653	151	-0.533	Distal Intergenic	+	CG	ENSOARG00000011858
18	9306519	9306554	36	-0.533	Distal Intergenic	+	CG	ENSOARG00000017297
21	46548084	46548099	16	-0.533	Distal Intergenic	+	CG	ENSOARG00000017817
3	178275914	178275923	10	-0.533	Distal Intergenic	+	CG	ENSOARG00000018327
22	11066277	11066547	271	-0.533	Distal Intergenic	-	CG	ENSOARG00000015307
1	272814565	272814570	6	-0.533	Distal Intergenic	-	CG	ENSOARG00000015558
10	51765373	51765408	36	-0.533	Distal Intergenic	-	CG	ENSOARG00000015939
2	134774404	134774411	8	-0.533	Intron (ENSOART00000000480/ENSOARG00000000451, intron 8 of 11)	+	CG	ENSOARG00000000451
8	84343182	84343212	31	-0.533	Intron (ENSOART00000005212/ENSOARG00000004788, intron 7 of 9)	-	CG	ENSOARG00000004788
16	61983432	61983644	213	-0.533	Intron (ENSOART00000015087/ENSOARG00000013859, intron 10 of 20)	+	CG	ENSOARG00000013859
4	36143693	36143709	17	-0.533	Intron (ENSOART00000016636/ENSOARG00000015286, intron 1 of 18)	+	CG	ENSOARG00000015286
4	43052826	43052860	35	-0.533	Intron (ENSOART00000019076/ENSOARG00000017524, intron 1 of 15)	+	CG	ENSOARG00000017524
1	208164428	208164448	21	-0.533	Intron (ENSOART00000022572/ENSOARG00000020719, intron 10 of 15)	+	CG	ENSOARG00000020719
15	70242349	70242460	112	-0.532	Distal Intergenic	+	CG	ENSOARG00000000187
10	57515026	57515036	11	-0.532	Distal Intergenic	+	CG	ENSOARG00000000468
3	64112598	64112650	53	-0.532	Distal Intergenic	+	CG	ENSOARG00000001663
26	42083662	42083708	47	-0.532	Distal Intergenic	+	CG	ENSOARG00000004643
26	43335451	43335469	19	-0.532	Distal Intergenic	+	CG	ENSOARG00000004647
8	14538265	14538497	233	-0.532	Distal Intergenic	+	CG	ENSOARG00000008072
13	75014750	75014819	70	-0.532	Distal Intergenic	+	CG	ENSOARG00000009276
2	169700282	169700353	72	-0.532	Distal Intergenic	+	CG	ENSOARG00000010178
9	72754762	72754953	192	-0.532	Distal Intergenic	+	CG	ENSOARG00000015650
10	34237867	34237888	22	-0.532	Distal Intergenic	+	CG	ENSOARG00000017045
7	47654121	47654135	15	-0.532	Distal Intergenic	-	CG	ENSOARG00000000900
10	77723931	77723941	11	-0.532	Distal Intergenic	-	CG	ENSOARG00000004918
9	24009930	24010134	205	-0.532	Distal Intergenic	-	CG	ENSOARG00000007914
9	1185203	1185335	133	-0.532	Distal Intergenic	-	CG	ENSOARG00000011066
15	4097142	4097290	149	-0.532	Intron (ENSOART00000003570/ENSOARG00000003293, intron 4 of 6)	-	CG	ENSOARG00000016917
X	75779065	75779150	86	-0.532	Intron (ENSOART00000003985/ENSOARG00000003674, intron 1 of 5)	+	CG	ENSOARG00000003674
23	24426996	24427001	6	-0.532	Intron (ENSOART00000006428/ENSOARG00000005904, intron 19 of 20)	+	CG	ENSOARG00000006008
3	80799890	80800165	276	-0.532	Intron (ENSOART00000007707/ENSOARG00000007081, intron 30 of 37)	+	CG	ENSOARG00000007191
X	49814513	49814530	18	-0.532	Intron (ENSOART00000009619/ENSOARG00000008835, intron 1 of 7)	-	CG	ENSOARG00000008835
24	21314087	21314290	204	-0.532	Intron (ENSOART00000018812/ENSOARG00000017281, intron 3 of 5)	+	CG	ENSOARG00000017281
1	93040834	93040910	77	-0.532	Intron (ENSOART00000022029/ENSOARG00000020234, intron 3 of 4)	-	CG	ENSOARG00000020234
9	45576371	45576463	93	-0.531	Distal Intergenic	+	CG	ENSOARG00000003097
23	56565567	56565594	28	-0.531	Distal Intergenic	+	CG	ENSOARG00000005143
3	83314552	83314625	74	-0.531	Distal Intergenic	+	CG	ENSOARG00000007679
2	187476243	187476260	18	-0.531	Distal Intergenic	+	CG	ENSOARG00000013477
6	38274315	38274406	92	-0.531	Distal Intergenic	-	CG	ENSOARG00000004333
23	51443239	51443256	18	-0.531	Distal Intergenic	-	CG	ENSOARG00000004682
10	77780547	77780707	161	-0.531	Distal Intergenic	-	CG	ENSOARG00000004918
10	15255492	15255544	53	-0.531	Distal Intergenic	-	CG	ENSOARG00000007547
1	271647199	271647447	249	-0.531	Distal Intergenic	-	CG	ENSOARG00000015440
13	31831032	31831130	99	-0.531	Intron (ENSOART00000014004/ENSOARG00000012882, intron 1 of 12)	+	CG	ENSOARG00000012882
13	17813669	17813685	17	-0.531	Intron (ENSOART00000018716/ENSOARG00000017196, intron 4 of 23)	-	CG	ENSOARG00000004445
4	54807058	54807070	13	-0.53	Distal Intergenic	+	CG	ENSOARG00000001954
8	48497473	48497592	120	-0.53	Distal Intergenic	+	CG	ENSOARG00000012911
1	60833917	60834207	291	-0.53	Distal Intergenic	+	CG	ENSOARG00000013854
3	183431392	183431416	25	-0.53	Distal Intergenic	+	CG	ENSOARG00000019481
3	60849850	60850068	219	-0.53	Distal Intergenic	+	CG	ENSOARG00000020932
17	38898988	38899137	150	-0.53	Distal Intergenic	-	CG	ENSOARG00000001549
14	32030238	32030459	222	-0.53	Distal Intergenic	-	CG	ENSOARG00000001829
23	4638005	4638015	11	-0.53	Distal Intergenic	-	CG	ENSOARG00000003761
12	52039025	52039070	46	-0.53	Distal Intergenic	-	CG	ENSOARG00000010890
4	76812304	76812339	36	-0.53	Distal Intergenic	-	CG	ENSOARG00000014655
5	98424582	98424644	63	-0.53	Distal Intergenic	-	CG	ENSOARG00000018280
3	42511568	42511815	248	-0.53	Distal Intergenic	-	CG	ENSOARG00000019966
12	62716308	62716324	17	-0.53	Intron (ENSOART00000001828/ENSOARG00000001695, intron 9 of 14)	-	CG	ENSOARG00000001695
24	39866128	39866164	37	-0.53	Intron (ENSOART00000004657/ENSOARG00000004277, intron 4 of 4)	-	CG	ENSOARG00000004277
18	67721592	67721616	25	-0.53	Intron (ENSOART00000007937/ENSOARG00000007297, intron 2 of 8)	-	CG	ENSOARG00000007370
2	154219897	154220019	123	-0.53	Intron (ENSOART00000008723/ENSOARG00000008011, intron 10 of 10)	-	CG	ENSOARG00000008026
2	168161050	168161154	105	-0.53	Intron (ENSOART00000010968/ENSOARG00000010057, intron 8 of 74)	+	CG	ENSOARG00000010057
7	5415143	5415211	69	-0.53	Intron (ENSOART00000018143/ENSOARG00000016653, intron 8 of 9)	-	CG	ENSOARG00000016653
2	8146619	8146623	5	-0.529	Distal Intergenic	+	CG	ENSOARG00000005941
X	4554864	4554892	29	-0.529	Distal Intergenic	+	CG	ENSOARG00000009563
1	172130089	172130190	102	-0.529	Distal Intergenic	+	CG	ENSOARG00000019045
7	50813041	50813252	212	-0.529	Distal Intergenic	+	CG	ENSOARG00000020878
23	47259428	47259447	20	-0.529	Distal Intergenic	-	CG	ENSOARG00000003607
16	36080747	36080871	125	-0.529	Distal Intergenic	-	CG	ENSOARG00000010082
24	6940485	6940493	9	-0.529	Distal Intergenic	-	CG	ENSOARG00000010652
5	106488272	106488361	90	-0.529	Distal Intergenic	-	CG	ENSOARG00000018924
25	42175539	42175548	10	-0.529	Intron (ENSOART00000001515/ENSOARG00000001405, intron 4 of 28)	-	CG	ENSOARG00000001287
3	10286402	10286643	242	-0.529	Intron (ENSOART00000013760/ENSOARG00000012658, intron 6 of 7)	-	CG	ENSOARG00000012658
18	55960370	55960463	94	-0.529	Intron (ENSOART00000014100/ENSOARG00000012969, intron 2 of 16)	+	CG	ENSOARG00000012969
2	198338885	198339048	164	-0.529	Intron (ENSOART00000016607/ENSOARG00000015246, intron 19 of 26)	-	CG	ENSOARG00000015246
1	4922513	4922636	124	-0.529	Intron (ENSOART00000020837/ENSOARG00000019132, intron 4 of 21)	-	CG	ENSOARG00000000331
3	189954183	189954267	85	-0.529	Intron (ENSOART00000021885/ENSOARG00000020103, intron 5 of 10)	-	CG	ENSOARG00000020106
9	43585235	43585462	228	-0.529	Promoter (<=1kb)	+	CG	ENSOARG00000017570
4	97553966	97554061	96	-0.528	Distal Intergenic	+	CG	ENSOARG00000006833
8	11712018	11712055	38	-0.528	Distal Intergenic	+	CG	ENSOARG00000007737
26	16524509	16524538	30	-0.528	Distal Intergenic	+	CG	ENSOARG00000008502
2	180535311	180535392	82	-0.528	Distal Intergenic	+	CG	ENSOARG00000011956
12	76617424	76617549	126	-0.528	Distal Intergenic	+	CG	ENSOARG00000015980
2	167118271	167118277	7	-0.528	Distal Intergenic	+	CG	ENSOARG00000019693
1	197652927	197652936	10	-0.528	Distal Intergenic	+	CG	ENSOARG00000020487
12	12471137	12471153	17	-0.528	Distal Intergenic	-	CG	ENSOARG00000010018
5	46408334	46408409	76	-0.528	Distal Intergenic	-	CG	ENSOARG00000015370
2	230849268	230849288	21	-0.528	Distal Intergenic	-	CG	ENSOARG00000020614
25	10196758	10196832	75	-0.528	Intron (ENSOART00000004152/ENSOARG00000003817, intron 21 of 106)	+	CG	ENSOARG00000003817
19	17034461	17034504	44	-0.528	Intron (ENSOART00000007593/ENSOARG00000006977, intron 4 of 19)	-	CG	ENSOARG00000006977
8	19252127	19252471	345	-0.528	Intron (ENSOART00000009293/ENSOARG00000008532, intron 8 of 12)	-	CG	ENSOARG00000008585
17	61613574	61613586	13	-0.528	Intron (ENSOART00000010741/ENSOARG00000009871, intron 32 of 60)	+	CG	ENSOARG00000010003
3	210105411	210105460	50	-0.528	Intron (ENSOART00000011281/ENSOARG00000010367, intron 2 of 8)	+	CG	ENSOARG00000010367
20	25806179	25806272	94	-0.528	Intron (ENSOART00000018271/ENSOARG00000016780, intron 6 of 9)	+	CG	ENSOARG00000016780
26	42477367	42477452	86	-0.527	Distal Intergenic	+	CG	ENSOARG00000004647
23	19207989	19208017	29	-0.527	Distal Intergenic	+	CG	ENSOARG00000005276
1	262034702	262034731	30	-0.527	Distal Intergenic	+	CG	ENSOARG00000011472
6	36800601	36800724	124	-0.527	Distal Intergenic	-	CG	ENSOARG00000002865
10	10621082	10621213	132	-0.527	Distal Intergenic	-	CG	ENSOARG00000006695
20	43025267	43025277	11	-0.527	Distal Intergenic	-	CG	ENSOARG00000014073
1	6654079	6654234	156	-0.527	Distal Intergenic	-	CG	ENSOARG00000019162
2	225394241	225394302	62	-0.527	Distal Intergenic	-	CG	ENSOARG00000020415
25	14919972	14919980	9	-0.527	Intron (ENSOART00000004558/ENSOARG00000004186, intron 11 of 13)	-	CG	ENSOARG00000004186
4	24911250	24911315	66	-0.527	Intron (ENSOART00000009145/ENSOARG00000008410, intron 8 of 10)	-	CG	ENSOARG00000008410
9	35199726	35199752	27	-0.527	Intron (ENSOART00000015506/ENSOARG00000014234, intron 7 of 22)	+	CG	ENSOARG00000014234
11	23725474	23725489	16	-0.527	Intron (ENSOART00000018254/ENSOARG00000016763, intron 2 of 2)	-	CG	ENSOARG00000004180
X	35255982	35256159	178	-0.526	Distal Intergenic	+	CG	ENSOARG00000000252
1	219245480	219245501	22	-0.526	Distal Intergenic	+	CG	ENSOARG00000001551
8	27356878	27357076	199	-0.526	Distal Intergenic	+	CG	ENSOARG00000010139
4	36934261	36934347	87	-0.526	Distal Intergenic	+	CG	ENSOARG00000015397
3	147861022	147861037	16	-0.526	Distal Intergenic	+	CG	ENSOARG00000020036
2	231593262	231593312	51	-0.526	Distal Intergenic	+	CG	ENSOARG00000020671
4	58920381	58920434	54	-0.526	Distal Intergenic	-	CG	ENSOARG00000003499
4	13880776	13880844	69	-0.526	Distal Intergenic	-	CG	ENSOARG00000004307
1	30025740	30025756	17	-0.526	Distal Intergenic	-	CG	ENSOARG00000007811
22	28151254	28151286	33	-0.526	Distal Intergenic	-	CG	ENSOARG00000009016
20	42868523	42868656	134	-0.526	Distal Intergenic	-	CG	ENSOARG00000014073
3	146548160	146548229	70	-0.526	Distal Intergenic	-	CG	ENSOARG00000019937
3	43248101	43248185	85	-0.526	Distal Intergenic	-	CG	ENSOARG00000020004
5	50108614	50108644	31	-0.525	3' UTR	+	CG	ENSOARG00000001132
20	49258460	49258674	215	-0.525	Distal Intergenic	+	CG	ENSOARG00000000859
21	10194696	10194704	9	-0.525	Distal Intergenic	+	CG	ENSOARG00000005132
4	61977437	61977444	8	-0.525	Distal Intergenic	+	CG	ENSOARG00000005715
1	80210655	80210675	21	-0.525	Distal Intergenic	+	CG	ENSOARG00000010862
8	33336665	33336830	166	-0.525	Distal Intergenic	+	CG	ENSOARG00000011435
2	183984908	183984949	42	-0.525	Distal Intergenic	+	CG	ENSOARG00000012857
X	107979222	107979505	284	-0.525	Distal Intergenic	+	CG	ENSOARG00000014954
X	58845618	58845685	68	-0.525	Distal Intergenic	+	CG	ENSOARG00000014962
11	22942224	22942482	259	-0.525	Distal Intergenic	+	CG	ENSOARG00000015610
4	8784027	8784241	215	-0.525	Distal Intergenic	+	CG	ENSOARG00000016629
3	136382435	136382454	20	-0.525	Distal Intergenic	+	CG	ENSOARG00000018401
10	71575152	71575165	14	-0.525	Distal Intergenic	-	CG	ENSOARG00000001372
24	8780894	8780983	90	-0.525	Distal Intergenic	-	CG	ENSOARG00000005625
17	18311658	18311726	69	-0.525	Distal Intergenic	-	CG	ENSOARG00000014103
24	6447201	6447334	134	-0.525	Intron (ENSOART00000005594/ENSOARG00000005135, intron 3 of 7)	+	CG	ENSOARG00000005135
22	45496087	45496167	81	-0.525	Intron (ENSOART00000014233/ENSOARG00000013080, intron 25 of 51)	-	CG	ENSOARG00000013914
5	43559208	43559359	152	-0.525	Intron (ENSOART00000015378/ENSOARG00000014111, intron 3 of 22)	-	CG	ENSOARG00000014231
9	70780202	70780211	10	-0.525	Intron (ENSOART00000016670/ENSOARG00000015316, intron 15 of 16)	-	CG	ENSOARG00000015316
2	15212664	15212702	39	-0.524	Distal Intergenic	+	CG	ENSOARG00000007169
25	34512962	34513036	75	-0.524	Distal Intergenic	+	CG	ENSOARG00000009725
13	10756680	10756771	92	-0.524	Distal Intergenic	+	CG	ENSOARG00000013082
12	75819173	75819357	185	-0.524	Distal Intergenic	+	CG	ENSOARG00000015718
1	197697366	197697381	16	-0.524	Distal Intergenic	+	CG	ENSOARG00000020487
1	102480510	102480539	30	-0.524	Distal Intergenic	-	CG	ENSOARG00000000593
9	80373118	80373259	142	-0.524	Distal Intergenic	-	CG	ENSOARG00000004813
13	4088759	4088927	169	-0.524	Distal Intergenic	-	CG	ENSOARG00000010523
10	36898337	36898421	85	-0.524	Distal Intergenic	-	CG	ENSOARG00000014871
1	134548847	134548877	31	-0.524	Distal Intergenic	-	CG	ENSOARG00000015555
5	27210098	27210176	79	-0.524	Distal Intergenic	-	CG	ENSOARG00000018762
20	49362703	49362743	41	-0.524	Intron (ENSOART00000000920/ENSOARG00000000859, intron 3 of 8)	+	CG	ENSOARG00000001174
9	17182412	17182446	35	-0.524	Intron (ENSOART00000005030/ENSOARG00000004606, intron 74 of 78)	+	CG	ENSOARG00000004943
12	31819381	31819394	14	-0.524	Intron (ENSOART00000006872/ENSOARG00000006316, intron 2 of 17)	-	CG	ENSOARG00000006316
14	9262796	9262822	27	-0.524	Intron (ENSOART00000010416/ENSOARG00000009566, intron 5 of 12)	-	CG	ENSOARG00000009646
18	56301805	56301879	75	-0.524	Intron (ENSOART00000014210/ENSOARG00000013073, intron 7 of 10)	-	CG	ENSOARG00000013162
3	104798745	104798758	14	-0.524	Intron (ENSOART00000015584/ENSOARG00000014305, intron 6 of 24)	-	CG	ENSOARG00000014305
1	106538027	106538067	41	-0.524	Promoter (<=1kb)	-	CG	ENSOARG00000006845
18	61099048	61099111	64	-0.523	Distal Intergenic	+	CG	ENSOARG00000000106
26	23327217	23327309	93	-0.523	Distal Intergenic	+	CG	ENSOARG00000004177
13	43071854	43072090	237	-0.523	Distal Intergenic	+	CG	ENSOARG00000004635
11	4690465	4690496	32	-0.523	Distal Intergenic	+	CG	ENSOARG00000004707
8	31933144	31933257	114	-0.523	Distal Intergenic	+	CG	ENSOARG00000011375
21	28862040	28862299	260	-0.523	Distal Intergenic	+	CG	ENSOARG00000012522
5	72898123	72898158	36	-0.523	Distal Intergenic	+	CG	ENSOARG00000014137
6	26700388	26700562	175	-0.523	Distal Intergenic	+	CG	ENSOARG00000016551
7	97871290	97871374	85	-0.523	Distal Intergenic	-	CG	ENSOARG00000003363
10	77720492	77720711	220	-0.523	Distal Intergenic	-	CG	ENSOARG00000004918
1	254204396	254204474	79	-0.523	Distal Intergenic	-	CG	ENSOARG00000008737
9	71258922	71259133	212	-0.523	Distal Intergenic	-	CG	ENSOARG00000015316
6	99313484	99313505	22	-0.523	Intron (ENSOART00000003780/ENSOARG00000003468, intron 69 of 69)	-	CG	ENSOARG00000003468
5	15164181	15164422	242	-0.523	Intron (ENSOART00000005162/ENSOARG00000004738, intron 10 of 16)	-	CG	ENSOARG00000004738
10	16685999	16686013	15	-0.523	Intron (ENSOART00000008601/ENSOARG00000007900, intron 5 of 9)	+	CG	ENSOARG00000007900
12	25231643	25231695	53	-0.523	Intron (ENSOART00000016443/ENSOARG00000015097, intron 14 of 20)	+	CG	ENSOARG00000015097
15	33101972	33102004	33	-0.523	Intron (ENSOART00000020465/ENSOARG00000018791, intron 3 of 8)	+	CG	ENSOARG00000018791
3	39142870	39142959	90	-0.523	Intron (ENSOART00000021607/ENSOARG00000019845, intron 1 of 1)	+	CG	ENSOARG00000019845
1	106213575	106213607	33	-0.522	Distal Intergenic	+	CG	ENSOARG00000006800
1	261452345	261452449	105	-0.522	Distal Intergenic	+	CG	ENSOARG00000011186
18	25549980	25549985	6	-0.522	Distal Intergenic	+	CG	ENSOARG00000015492
3	214772186	214772494	309	-0.522	Distal Intergenic	+	CG	ENSOARG00000016513
10	2191761	2191905	145	-0.522	Distal Intergenic	-	CG	ENSOARG00000006244
4	99387520	99387553	34	-0.522	Distal Intergenic	-	CG	ENSOARG00000009651
7	38026579	38026640	62	-0.522	Distal Intergenic	-	CG	ENSOARG00000020597
17	6463881	6463915	35	-0.522	Intron (ENSOART00000005788/ENSOARG00000005309, intron 2 of 20)	-	CG	ENSOARG00000005025
23	22540387	22540515	129	-0.522	Intron (ENSOART00000006313/ENSOARG00000005795, intron 18 of 19)	+	CG	ENSOARG00000003832
18	67646148	67646187	40	-0.522	Intron (ENSOART00000007937/ENSOARG00000007297, intron 2 of 8)	-	CG	ENSOARG00000007370
18	45850236	45850495	260	-0.522	Intron (ENSOART00000008906/ENSOARG00000008179, intron 7 of 8)	+	CG	ENSOARG00000008050
21	29094663	29094676	14	-0.522	Intron (ENSOART00000014162/ENSOARG00000013028, intron 15 of 15)	-	CG	ENSOARG00000013028
12	26614393	26614420	28	-0.522	Intron (ENSOART00000018255/ENSOARG00000016755, intron 88 of 88)	-	CG	ENSOARG00000017157
20	26080510	26080699	190	-0.522	Promoter (<=1kb)	+	CG	ENSOARG00000017293
18	20749759	20749834	76	-0.522	Promoter (2-3kb)	+	CG	ENSOARG00000012205
20	49910959	49911111	153	-0.521	Distal Intergenic	+	CG	ENSOARG00000002773
16	7633861	7634148	288	-0.521	Distal Intergenic	+	CG	ENSOARG00000005074
6	77020935	77021198	264	-0.521	Distal Intergenic	+	CG	ENSOARG00000005854
9	84193689	84193933	245	-0.521	Distal Intergenic	+	CG	ENSOARG00000009003
2	157184904	157184971	68	-0.521	Distal Intergenic	+	CG	ENSOARG00000009199
12	9717981	9718057	77	-0.521	Distal Intergenic	+	CG	ENSOARG00000009329
16	62257999	62258266	268	-0.521	Distal Intergenic	+	CG	ENSOARG00000013884
17	15937310	15937321	12	-0.521	Distal Intergenic	+	CG	ENSOARG00000015086
24	23382719	23382738	20	-0.521	Distal Intergenic	+	CG	ENSOARG00000018686
3	29067825	29067892	68	-0.521	Distal Intergenic	+	CG	ENSOARG00000019479
7	72817809	72817832	24	-0.521	Distal Intergenic	-	CG	ENSOARG00000000983
8	23922083	23922361	279	-0.521	Distal Intergenic	-	CG	ENSOARG00000009527
23	41326511	41326539	29	-0.521	Intron (ENSOART00000000606/ENSOARG00000000549, intron 31 of 31)	+	CG	ENSOARG00000000728
2	239988277	239988467	191	-0.521	Intron (ENSOART00000006187/ENSOARG00000005679, intron 5 of 11)	+	CG	ENSOARG00000005679
2	46726963	46727023	61	-0.521	Intron (ENSOART00000011707/ENSOARG00000010762, intron 23 of 23)	-	CG	ENSOARG00000010762
3	19613959	19613970	12	-0.521	Intron (ENSOART00000016883/ENSOARG00000015507, intron 1 of 20)	-	CG	ENSOARG00000015507
17	458607	458662	56	-0.521	Intron (ENSOART00000017588/ENSOARG00000016153, intron 1 of 8)	+	CG	ENSOARG00000016153
26	30664590	30664595	6	-0.52	Distal Intergenic	+	CG	ENSOARG00000000631
23	54312993	54313105	113	-0.52	Distal Intergenic	+	CG	ENSOARG00000004928
23	28990426	28990678	253	-0.52	Distal Intergenic	+	CG	ENSOARG00000006907
16	56106239	56106285	47	-0.52	Distal Intergenic	+	CG	ENSOARG00000012972
2	105778549	105778566	18	-0.52	Distal Intergenic	+	CG	ENSOARG00000015352
15	30628731	30628766	36	-0.52	Distal Intergenic	+	CG	ENSOARG00000017361
2	167613113	167613167	55	-0.52	Distal Intergenic	+	CG	ENSOARG00000019693
8	770647	770746	100	-0.52	Distal Intergenic	-	CG	ENSOARG00000006317
10	12476337	12476458	122	-0.52	Distal Intergenic	-	CG	ENSOARG00000007167
2	158917849	158918094	246	-0.52	Distal Intergenic	-	CG	ENSOARG00000009330
21	25416261	25416351	91	-0.52	Distal Intergenic	-	CG	ENSOARG00000009340
21	41855350	41855368	19	-0.52	Intron (ENSOART00000005757/ENSOARG00000005284, intron 3 of 4)	+	CG	ENSOARG00000005284
1	256534151	256534246	96	-0.52	Intron (ENSOART00000010041/ENSOARG00000009221, intron 7 of 9)	+	CG	ENSOARG00000009221
13	10687025	10687093	69	-0.52	Intron (ENSOART00000014222/ENSOARG00000013082, intron 15 of 17)	+	CG	ENSOARG00000013082
22	10372791	10372870	80	-0.52	Intron (ENSOART00000016126/ENSOARG00000014814, intron 1 of 7)	-	CG	ENSOARG00000014814
24	19856436	19856491	56	-0.52	Intron (ENSOART00000016664/ENSOARG00000015303, intron 21 of 32)	+	CG	ENSOARG00000015554
20	45199819	45199828	10	-0.52	Intron (ENSOART00000018047/ENSOARG00000016571, intron 16 of 17)	+	CG	ENSOARG00000016571
20	45032875	45033031	157	-0.52	Intron (ENSOART00000018047/ENSOARG00000016571, intron 6 of 17)	+	CG	ENSOARG00000016571
14	4269603	4269683	81	-0.519	Distal Intergenic	+	CG	ENSOARG00000007693
13	5065387	5065432	46	-0.519	Distal Intergenic	+	CG	ENSOARG00000010789
X	59234446	59234858	413	-0.519	Distal Intergenic	+	CG	ENSOARG00000014995
3	20759951	20760003	53	-0.519	Distal Intergenic	+	CG	ENSOARG00000016144
3	155074868	155075126	259	-0.519	Distal Intergenic	-	CG	ENSOARG00000003339
24	4532946	4532961	16	-0.519	Distal Intergenic	-	CG	ENSOARG00000005096
4	75437874	75438063	190	-0.519	Distal Intergenic	-	CG	ENSOARG00000012830
13	11282797	11283004	208	-0.519	Distal Intergenic	-	CG	ENSOARG00000013242
23	20797996	20798013	18	-0.519	Intron (ENSOART00000005852/ENSOARG00000005365, intron 27 of 31)	-	CG	ENSOARG00000005365
15	43094907	43095082	176	-0.519	Intron (ENSOART00000014753/ENSOARG00000013562, intron 16 of 22)	+	CG	ENSOARG00000013562
24	40128242	40128281	40	-0.518	Distal Intergenic	+	CG	ENSOARG00000004356
23	9907902	9907940	39	-0.518	Distal Intergenic	+	CG	ENSOARG00000005040
2	24388627	24388652	26	-0.518	Distal Intergenic	+	CG	ENSOARG00000007786
3	166480107	166480234	128	-0.518	Distal Intergenic	+	CG	ENSOARG00000012887
1	50522359	50522399	41	-0.518	Distal Intergenic	-	CG	ENSOARG00000012407
8	17611343	17611544	202	-0.518	Distal Intergenic	-	CG	ENSOARG00000019969
3	50115256	50115527	272	-0.518	Distal Intergenic	-	CG	ENSOARG00000020338
10	70012994	70013001	8	-0.518	Intron (ENSOART00000001009/ENSOARG00000000935, intron 11 of 29)	-	CG	ENSOARG00000000935
13	38287898	38287928	31	-0.518	Intron (ENSOART00000001508/ENSOARG00000001399, intron 3 of 17)	+	CG	ENSOARG00000001614
7	87555984	87555988	5	-0.518	Intron (ENSOART00000003000/ENSOARG00000002769, intron 1 of 1)	+	CG	ENSOARG00000002769
16	1727883	1727985	103	-0.518	Intron (ENSOART00000003289/ENSOARG00000003028, intron 25 of 48)	-	CG	ENSOARG00000003116
3	155528400	155528463	64	-0.518	Intron (ENSOART00000004259/ENSOARG00000003915, intron 13 of 22)	-	CG	ENSOARG00000003915
8	84064209	84064254	46	-0.518	Intron (ENSOART00000005212/ENSOARG00000004788, intron 5 of 9)	-	CG	ENSOARG00000004781
15	6357373	6357540	168	-0.518	Intron (ENSOART00000007671/ENSOARG00000007051, intron 3 of 10)	-	CG	ENSOARG00000006859
1	251028574	251028764	191	-0.518	Intron (ENSOART00000008644/ENSOARG00000007925, intron 9 of 15)	-	CG	ENSOARG00000007925
4	104623229	104623328	100	-0.518	Intron (ENSOART00000014935/ENSOARG00000013726, intron 9 of 15)	-	CG	ENSOARG00000013915
19	46666654	46666691	38	-0.518	Intron (ENSOART00000016903/ENSOARG00000015530, intron 36 of 36)	-	CG	ENSOARG00000015530
5	26287104	26287203	100	-0.517	Distal Intergenic	+	CG	ENSOARG00000018623
15	64645549	64645595	47	-0.517	Distal Intergenic	+	CG	ENSOARG00000019022
8	71956965	71957054	90	-0.517	Distal Intergenic	-	CG	ENSOARG00000002402
16	11258889	11258894	6	-0.517	Distal Intergenic	-	CG	ENSOARG00000005870
20	40816326	40816352	27	-0.517	Distal Intergenic	-	CG	ENSOARG00000012666
11	8067985	8068003	19	-0.517	Distal Intergenic	-	CG	ENSOARG00000013763
22	33847948	33847990	43	-0.517	Distal Intergenic	-	CG	ENSOARG00000014762
8	47364903	47364995	93	-0.517	Intron (ENSOART00000013438/ENSOARG00000012361, intron 2 of 7)	-	CG	ENSOARG00000012385
6	92091980	92092024	45	-0.517	Intron (ENSOART00000019338/ENSOARG00000017771, intron 8 of 11)	-	CG	ENSOARG00000017771
X	81317182	81317345	164	-0.516	Distal Intergenic	+	CG	ENSOARG00000009444
22	470371	470405	35	-0.516	Distal Intergenic	+	CG	ENSOARG00000012946
16	62750052	62750291	240	-0.516	Distal Intergenic	+	CG	ENSOARG00000014144
18	62126428	62126443	16	-0.516	Distal Intergenic	-	CG	ENSOARG00000000168
20	14624063	14624270	208	-0.516	Distal Intergenic	-	CG	ENSOARG00000000511
13	24708753	24708766	14	-0.516	Distal Intergenic	-	CG	ENSOARG00000003154
15	4577748	4577763	16	-0.516	Distal Intergenic	-	CG	ENSOARG00000003665
23	6693799	6693826	28	-0.516	Distal Intergenic	-	CG	ENSOARG00000003772
16	17625423	17625496	74	-0.516	Distal Intergenic	-	CG	ENSOARG00000007013
18	11002194	11002309	116	-0.516	Distal Intergenic	-	CG	ENSOARG00000010173
22	44145762	44145820	59	-0.516	Distal Intergenic	-	CG	ENSOARG00000011176
17	23263961	23264052	92	-0.516	Distal Intergenic	-	CG	ENSOARG00000014454
2	131912465	131912542	78	-0.516	Distal Intergenic	-	CG	ENSOARG00000017442
23	469373	469430	58	-0.516	Intron (ENSOART00000004414/ENSOARG00000004060, intron 6 of 6)	-	CG	ENSOARG00000004060
X	319335	319355	21	-0.516	Intron (ENSOART00000008004/ENSOARG00000007358, intron 1 of 1)	+	CG	ENSOARG00000007358
13	15045337	15045366	30	-0.516	Intron (ENSOART00000015298/ENSOARG00000014052, intron 2 of 13)	+	CG	ENSOARG00000014052
3	173040923	173040998	76	-0.516	Intron (ENSOART00000018312/ENSOARG00000016814, intron 13 of 13)	+	CG	ENSOARG00000016814
26	1027446	1027681	236	-0.515	Distal Intergenic	+	CG	ENSOARG00000005650
2	12538229	12538242	14	-0.515	Distal Intergenic	+	CG	ENSOARG00000006760
16	45775111	45775274	164	-0.515	Distal Intergenic	+	CG	ENSOARG00000012712
15	80110534	80110605	72	-0.515	Distal Intergenic	+	CG	ENSOARG00000012742
13	82268156	82268174	19	-0.515	Distal Intergenic	+	CG	ENSOARG00000015311
14	28108263	28108431	169	-0.515	Distal Intergenic	-	CG	ENSOARG00000001729
1	223728878	223729010	133	-0.515	Distal Intergenic	-	CG	ENSOARG00000001842
20	32123594	32123652	59	-0.515	Distal Intergenic	-	CG	ENSOARG00000006546
13	39177451	39177456	6	-0.515	Intron (ENSOART00000003711/ENSOARG00000003400, intron 23 of 37)	-	CG	ENSOARG00000003400
17	11719351	11719440	90	-0.515	Intron (ENSOART00000009147/ENSOARG00000008411, intron 5 of 10)	-	CG	ENSOARG00000008443
18	14100018	14100074	57	-0.515	Intron (ENSOART00000011452/ENSOARG00000010528, intron 7 of 8)	-	CG	ENSOARG00000010528
3	60284865	60284983	119	-0.515	Intron (ENSOART00000022772/ENSOARG00000020901, intron 1 of 2)	-	CG	ENSOARG00000020901
6	16074542	16074588	47	-0.514	Distal Intergenic	+	CG	ENSOARG00000006816
5	73790905	73790980	76	-0.514	Distal Intergenic	+	CG	ENSOARG00000014137
26	30133287	30133360	74	-0.514	Distal Intergenic	-	CG	ENSOARG00000000596
2	153516434	153516472	39	-0.514	Distal Intergenic	-	CG	ENSOARG00000008000
10	23541467	23541621	155	-0.514	Intron (ENSOART00000010606/ENSOARG00000009746, intron 3 of 6)	+	CG	ENSOARG00000009746
16	63730628	63730654	27	-0.514	Intron (ENSOART00000015644/ENSOARG00000014361, intron 4 of 23)	+	CG	ENSOARG00000014361
9	69144113	69144402	290	-0.514	Intron (ENSOART00000016370/ENSOARG00000015039, intron 4 of 5)	+	CG	ENSOARG00000015039
2	203395648	203395784	137	-0.514	Intron (ENSOART00000019098/ENSOARG00000017548, intron 15 of 19)	-	CG	ENSOARG00000017555
4	81679795	81679839	45	-0.514	Intron (ENSOART00000019261/ENSOARG00000017701, intron 1 of 4)	-	CG	ENSOARG00000017701
23	3506848	3506897	50	-0.513	Distal Intergenic	+	CG	ENSOARG00000004562
24	11247672	11247707	36	-0.513	Distal Intergenic	+	CG	ENSOARG00000007193
26	19054564	19054809	246	-0.513	Distal Intergenic	+	CG	ENSOARG00000009585
1	159075857	159076069	213	-0.513	Distal Intergenic	+	CG	ENSOARG00000017360
X	41802255	41802261	7	-0.513	Distal Intergenic	+	CG	ENSOARG00000019425
18	61441165	61441194	30	-0.513	Distal Intergenic	-	CG	ENSOARG00000000168
21	2896939	2897217	279	-0.513	Distal Intergenic	-	CG	ENSOARG00000003103
8	24005390	24005396	7	-0.513	Distal Intergenic	-	CG	ENSOARG00000009527
8	41596156	41596518	363	-0.513	Distal Intergenic	-	CG	ENSOARG00000012148
11	58804205	58804217	13	-0.513	Distal Intergenic	-	CG	ENSOARG00000013847
1	270081194	270081263	70	-0.513	Distal Intergenic	-	CG	ENSOARG00000014842
21	13867071	13867194	124	-0.513	Distal Intergenic	-	CG	ENSOARG00000015261
10	64128623	64128973	351	-0.513	Distal Intergenic	-	CG	ENSOARG00000017177
15	45540541	45540578	38	-0.513	Distal Intergenic	-	CG	ENSOARG00000017341
5	23907356	23907361	6	-0.513	Distal Intergenic	-	CG	ENSOARG00000017766
3	179668088	179668103	16	-0.513	Distal Intergenic	-	CG	ENSOARG00000018848
X	40165005	40165044	40	-0.513	Distal Intergenic	-	CG	ENSOARG00000019397
9	36443020	36443171	152	-0.513	Distal Intergenic	-	CG	ENSOARG00000020184
15	4093115	4093511	397	-0.513	Intron (ENSOART00000003570/ENSOARG00000003293, intron 3 of 6)	-	CG	ENSOARG00000016917
6	71714629	71714655	27	-0.513	Intron (ENSOART00000003719/ENSOARG00000003424, intron 2 of 9)	-	CG	ENSOARG00000003597
11	36107021	36107108	88	-0.513	Intron (ENSOART00000005904/ENSOARG00000005412, intron 2 of 24)	-	CG	ENSOARG00000005308
19	46301289	46301402	114	-0.513	Intron (ENSOART00000016903/ENSOARG00000015530, intron 27 of 36)	+	CG	ENSOARG00000015697
3	219611011	219611030	20	-0.513	Intron (ENSOART00000021044/ENSOARG00000019323, intron 5 of 7)	-	CG	ENSOARG00000019323
7	40683130	40683174	45	-0.513	Intron (ENSOART00000022522/ENSOARG00000020672, intron 5 of 29)	-	CG	ENSOARG00000020654
14	33480570	33480622	53	-0.512	Distal Intergenic	+	CG	ENSOARG00000001849
15	675878	675964	87	-0.512	Distal Intergenic	+	CG	ENSOARG00000001853
8	33814458	33814465	8	-0.512	Distal Intergenic	+	CG	ENSOARG00000011435
8	46544399	46544622	224	-0.512	Distal Intergenic	+	CG	ENSOARG00000012321
16	61534087	61534159	73	-0.512	Distal Intergenic	+	CG	ENSOARG00000013859
1	62019095	62019198	104	-0.512	Distal Intergenic	+	CG	ENSOARG00000014336
21	5720010	5720090	81	-0.512	Distal Intergenic	-	CG	ENSOARG00000003888
8	82271002	82271018	17	-0.512	Distal Intergenic	-	CG	ENSOARG00000004503
4	113483768	113483929	162	-0.512	Distal Intergenic	-	CG	ENSOARG00000004505
26	7842274	7842455	182	-0.512	Distal Intergenic	-	CG	ENSOARG00000006863
2	151742187	151742447	261	-0.512	Distal Intergenic	-	CG	ENSOARG00000007964
9	56259639	56259854	216	-0.512	Distal Intergenic	-	CG	ENSOARG00000008295
22	25833566	25833866	301	-0.512	Distal Intergenic	-	CG	ENSOARG00000008709
18	10463679	10463691	13	-0.512	Distal Intergenic	-	CG	ENSOARG00000010173
20	48562160	48562276	117	-0.512	Intron (ENSOART00000000076/ENSOARG00000000065, intron 5 of 7)	-	CG	ENSOARG00000000065
2	140247429	140247688	260	-0.512	Intron (ENSOART00000004687/ENSOARG00000004301, intron 14 of 16)	+	CG	ENSOARG00000004301
11	14606191	14606426	236	-0.512	Intron (ENSOART00000008636/ENSOARG00000007928, intron 1 of 7)	+	CG	ENSOARG00000007928
24	14106191	14106211	21	-0.512	Intron (ENSOART00000009785/ENSOARG00000008975, intron 5 of 39)	+	CG	ENSOARG00000008719
11	31665499	31665756	258	-0.512	Intron (ENSOART00000017890/ENSOARG00000016428, intron 3 of 7)	+	CG	ENSOARG00000016428
1	95598928	95599219	292	-0.512	Intron (ENSOART00000022187/ENSOARG00000020376, intron 3 of 7)	-	CG	ENSOARG00000020376
1	16824036	16824499	464	-0.511	5' UTR	+	CG	ENSOARG00000020435
6	7978907	7978924	18	-0.511	Distal Intergenic	+	CG	ENSOARG00000000262
12	6609508	6609545	38	-0.511	Distal Intergenic	+	CG	ENSOARG00000004974
26	10772627	10772912	286	-0.511	Distal Intergenic	+	CG	ENSOARG00000006869
25	37524438	37524466	29	-0.511	Distal Intergenic	+	CG	ENSOARG00000010379
18	57707010	57707063	54	-0.511	Distal Intergenic	+	CG	ENSOARG00000014617
1	170976258	170976276	19	-0.511	Distal Intergenic	+	CG	ENSOARG00000018866
2	131438458	131438517	60	-0.511	Distal Intergenic	+	CG	ENSOARG00000019628
7	73706789	73706882	94	-0.511	Distal Intergenic	+	CG	ENSOARG00000021153
17	38220447	38220663	217	-0.511	Distal Intergenic	-	CG	ENSOARG00000001517
6	106559410	106559720	311	-0.511	Distal Intergenic	-	CG	ENSOARG00000007934
1	31726560	31726588	29	-0.511	Distal Intergenic	-	CG	ENSOARG00000008224
9	31783560	31783582	23	-0.511	Distal Intergenic	-	CG	ENSOARG00000011105
9	88754666	88754671	6	-0.511	Intron (ENSOART00000013118/ENSOARG00000012048, intron 8 of 16)	-	CG	ENSOARG00000012048
1	96804142	96804154	13	-0.511	Intron (ENSOART00000022309/ENSOARG00000020482, intron 3 of 46)	+	CG	ENSOARG00000020482
5	860362	860426	65	-0.51	Distal Intergenic	+	CG	ENSOARG00000001974
25	1182536	1182552	17	-0.51	Distal Intergenic	+	CG	ENSOARG00000003102
23	18724905	18725009	105	-0.51	Distal Intergenic	+	CG	ENSOARG00000005276
10	15303460	15303509	50	-0.51	Distal Intergenic	+	CG	ENSOARG00000007602
2	24265295	24265374	80	-0.51	Distal Intergenic	+	CG	ENSOARG00000007786
14	7577021	7577035	15	-0.51	Distal Intergenic	+	CG	ENSOARG00000008797
9	84715070	84715203	134	-0.51	Distal Intergenic	+	CG	ENSOARG00000009084
1	40889013	40889239	227	-0.51	Distal Intergenic	+	CG	ENSOARG00000010394
1	138614270	138614510	241	-0.51	Distal Intergenic	+	CG	ENSOARG00000015912
7	11629199	11629241	43	-0.51	Distal Intergenic	+	CG	ENSOARG00000017693
3	177979563	177979615	53	-0.51	Distal Intergenic	+	CG	ENSOARG00000018327
17	36905633	36905655	23	-0.51	Distal Intergenic	-	CG	ENSOARG00000001517
22	560302	560321	20	-0.51	Distal Intergenic	-	CG	ENSOARG00000012995
5	19691541	19691555	15	-0.51	Distal Intergenic	-	CG	ENSOARG00000015213
2	200439795	200439863	69	-0.51	Distal Intergenic	-	CG	ENSOARG00000015783
5	103021566	103021904	339	-0.51	Distal Intergenic	-	CG	ENSOARG00000018761
8	17643674	17643913	240	-0.51	Distal Intergenic	-	CG	ENSOARG00000019969
3	1619661	1619729	69	-0.51	Intron (ENSOART00000002463/ENSOARG00000002277, intron 2 of 12)	-	CG	ENSOARG00000002366
12	65263123	65263345	223	-0.51	Intron (ENSOART00000005655/ENSOARG00000005151, intron 81 of 106)	+	CG	ENSOARG00000006194
12	66601168	66601217	50	-0.51	Intron (ENSOART00000008892/ENSOARG00000008173, intron 5 of 5)	-	CG	ENSOARG00000008173
9	63655719	63655731	13	-0.51	Intron (ENSOART00000012260/ENSOARG00000011267, intron 1 of 69)	+	CG	ENSOARG00000011267
25	20758153	20758199	47	-0.509	Distal Intergenic	+	CG	ENSOARG00000004708
6	113408871	113408905	35	-0.509	Distal Intergenic	+	CG	ENSOARG00000011661
7	45757308	45757511	204	-0.509	Distal Intergenic	+	CG	ENSOARG00000020816
17	40232333	40232515	183	-0.509	Distal Intergenic	-	CG	ENSOARG00000004733
10	81376996	81377076	81	-0.509	Distal Intergenic	-	CG	ENSOARG00000005448
13	74132701	74132782	82	-0.509	Distal Intergenic	-	CG	ENSOARG00000006566
2	160061084	160061171	88	-0.509	Distal Intergenic	-	CG	ENSOARG00000009700
13	76230690	76230994	305	-0.509	Distal Intergenic	-	CG	ENSOARG00000010543
24	29323386	29323392	7	-0.509	Distal Intergenic	-	CG	ENSOARG00000010813
2	175787006	175787071	66	-0.509	Distal Intergenic	-	CG	ENSOARG00000011436
2	100947556	100947711	156	-0.509	Distal Intergenic	-	CG	ENSOARG00000014827
12	77256916	77256942	27	-0.509	Distal Intergenic	-	CG	ENSOARG00000016074
1	169552371	169552477	107	-0.509	Distal Intergenic	-	CG	ENSOARG00000018775
7	31254140	31254350	211	-0.509	Distal Intergenic	-	CG	ENSOARG00000020044
10	69465351	69465360	10	-0.509	Intron (ENSOART00000000663/ENSOARG00000000618, intron 2 of 7)	-	CG	ENSOARG00000000618
21	23201673	23201680	8	-0.509	Intron (ENSOART00000008626/ENSOARG00000007919, intron 1 of 12)	+	CG	ENSOARG00000007960
12	54176733	54176925	193	-0.509	Intron (ENSOART00000014378/ENSOARG00000013220, intron 18 of 24)	+	CG	ENSOARG00000013603
3	124736663	124736678	16	-0.509	Intron (ENSOART00000016966/ENSOARG00000015592, intron 8 of 8)	-	CG	ENSOARG00000015592
3	130611319	130611349	31	-0.509	Intron (ENSOART00000017337/ENSOARG00000015916, intron 15 of 15)	-	CG	ENSOARG00000015916
13	67233462	67233585	124	-0.508	Distal Intergenic	+	CG	ENSOARG00000000405
25	17738802	17738808	7	-0.508	Distal Intergenic	+	CG	ENSOARG00000004403
8	85440727	85440777	51	-0.508	Distal Intergenic	+	CG	ENSOARG00000004811
9	20408825	20408956	132	-0.508	Distal Intergenic	+	CG	ENSOARG00000005227
6	41352881	41353089	209	-0.508	Distal Intergenic	+	CG	ENSOARG00000005453
5	64184510	64184554	45	-0.508	Distal Intergenic	+	CG	ENSOARG00000010435
16	38870547	38870759	213	-0.508	Distal Intergenic	+	CG	ENSOARG00000011449
5	26875439	26875562	124	-0.508	Distal Intergenic	+	CG	ENSOARG00000018623
3	29073787	29073836	50	-0.508	Distal Intergenic	+	CG	ENSOARG00000019479
3	70282910	70283117	208	-0.508	Distal Intergenic	-	CG	ENSOARG00000004190
2	155995494	155995664	171	-0.508	Distal Intergenic	-	CG	ENSOARG00000008264
18	12352122	12352164	43	-0.508	Distal Intergenic	-	CG	ENSOARG00000010206
18	51717109	51717330	222	-0.508	Distal Intergenic	-	CG	ENSOARG00000013830
19	40080767	40080800	34	-0.508	Distal Intergenic	-	CG	ENSOARG00000014104
2	94460169	94460222	54	-0.508	Distal Intergenic	-	CG	ENSOARG00000014501
26	6413977	6414093	117	-0.508	Exon (ENSOART00000007182/ENSOARG00000006596, exon 12 of 30)	+	CG	ENSOARG00000006596
10	72383074	72383175	102	-0.508	Intron (ENSOART00000002266/ENSOARG00000002096, intron 13 of 20)	-	CG	ENSOARG00000002096
9	87048479	87048507	29	-0.508	Intron (ENSOART00000012330/ENSOARG00000011340, intron 1 of 9)	-	CG	ENSOARG00000011247
3	213984392	213984517	126	-0.508	Intron (ENSOART00000016597/ENSOARG00000015251, intron 7 of 7)	-	CG	ENSOARG00000015251
16	70998776	70998852	77	-0.508	Intron (ENSOART00000017558/ENSOARG00000016124, intron 2 of 2)	+	CG	ENSOARG00000016131
20	47766097	47766167	71	-0.508	Intron (ENSOART00000020080/ENSOARG00000018445, intron 2 of 13)	+	CG	ENSOARG00000018445
19	12768524	12768726	203	-0.507	Distal Intergenic	+	CG	ENSOARG00000002491
24	5887212	5887244	33	-0.507	Distal Intergenic	+	CG	ENSOARG00000005135
25	26081730	26081861	132	-0.507	Distal Intergenic	+	CG	ENSOARG00000005812
13	2557767	2557772	6	-0.507	Distal Intergenic	+	CG	ENSOARG00000010085
5	64321064	64321615	552	-0.507	Distal Intergenic	+	CG	ENSOARG00000010435
15	61842826	61842861	36	-0.507	Distal Intergenic	+	CG	ENSOARG00000017028
8	48725079	48725114	36	-0.507	Distal Intergenic	+	CG	ENSOARG00000019995
3	58378345	58378389	45	-0.507	Distal Intergenic	+	CG	ENSOARG00000020715
1	100381981	100382011	31	-0.507	Distal Intergenic	+	CG	ENSOARG00000021017
1	249718227	249718417	191	-0.507	Distal Intergenic	-	CG	ENSOARG00000015598
6	7752998	7753112	115	-0.507	Distal Intergenic	-	CG	ENSOARG00000017811
5	105597821	105597864	44	-0.507	Distal Intergenic	-	CG	ENSOARG00000018858
16	525042	525159	118	-0.507	Intron (ENSOART00000003034/ENSOARG00000002790, intron 14 of 31)	-	CG	ENSOARG00000002790
9	3980353	3980561	209	-0.507	Intron (ENSOART00000012606/ENSOARG00000011573, intron 5 of 38)	+	CG	ENSOARG00000011573
5	72472616	72472659	44	-0.507	Intron (ENSOART00000015381/ENSOARG00000014126, intron 7 of 17)	+	CG	ENSOARG00000014126
6	94389168	94389287	120	-0.507	Intron (ENSOART00000020569/ENSOARG00000018889, intron 14 of 16)	-	CG	ENSOARG00000018889
3	142581749	142581822	74	-0.507	Intron (ENSOART00000021392/ENSOARG00000019645, intron 6 of 7)	-	CG	ENSOARG00000019645
21	27638454	27638463	10	-0.507	Promoter (1-2kb)	+	CG	ENSOARG00000011115
11	6447119	6447153	35	-0.506	Distal Intergenic	+	CG	ENSOARG00000006151
1	247688474	247688761	288	-0.506	Distal Intergenic	+	CG	ENSOARG00000007026
4	45612971	45613082	112	-0.506	Distal Intergenic	+	CG	ENSOARG00000008266
17	11082112	11082412	301	-0.506	Distal Intergenic	+	CG	ENSOARG00000008310
2	55330770	55330969	200	-0.506	Distal Intergenic	+	CG	ENSOARG00000008344
1	40322336	40322459	124	-0.506	Distal Intergenic	+	CG	ENSOARG00000010184
25	35399629	35399852	224	-0.506	Distal Intergenic	+	CG	ENSOARG00000010287
2	66480938	66480947	10	-0.506	Distal Intergenic	+	CG	ENSOARG00000012988
3	193242396	193242430	35	-0.506	Distal Intergenic	+	CG	ENSOARG00000020278
X	41539048	41539056	9	-0.506	Distal Intergenic	-	CG	ENSOARG00000003636
26	41290908	41290961	54	-0.506	Distal Intergenic	-	CG	ENSOARG00000004636
15	46946311	46946338	28	-0.506	Distal Intergenic	-	CG	ENSOARG00000007131
2	93744749	93744761	13	-0.506	Distal Intergenic	-	CG	ENSOARG00000008914
5	86343713	86343742	30	-0.506	Distal Intergenic	-	CG	ENSOARG00000016099
2	123647704	123647958	255	-0.506	Distal Intergenic	-	CG	ENSOARG00000016705
5	90880557	90880571	15	-0.506	Distal Intergenic	-	CG	ENSOARG00000016711
7	61090473	61090532	60	-0.506	Distal Intergenic	-	CG	ENSOARG00000021035
X	84685515	84685545	31	-0.506	Exon (ENSOART00000010223/ENSOARG00000009392, exon 1 of 1)	-	CG	ENSOARG00000009392
8	49625780	49625796	17	-0.506	Intron (ENSOART00000014209/ENSOARG00000013071, intron 6 of 11)	-	CG	ENSOARG00000013071
2	73122346	73122355	10	-0.506	Intron (ENSOART00000014706/ENSOARG00000013525, intron 3 of 5)	+	CG	ENSOARG00000013525
18	60898722	60898872	151	-0.505	Distal Intergenic	+	CG	ENSOARG00000000106
23	48312567	48312868	302	-0.505	Distal Intergenic	+	CG	ENSOARG00000003754
17	57975390	57975570	181	-0.505	Distal Intergenic	+	CG	ENSOARG00000005602
10	599749	599913	165	-0.505	Distal Intergenic	+	CG	ENSOARG00000006201
6	46360924	46360966	43	-0.505	Distal Intergenic	+	CG	ENSOARG00000008918
3	14336291	14336474	184	-0.505	Distal Intergenic	+	CG	ENSOARG00000014575
6	4915651	4915745	95	-0.505	Distal Intergenic	+	CG	ENSOARG00000015473
5	97187639	97187646	8	-0.505	Distal Intergenic	+	CG	ENSOARG00000018255
3	53218297	53218555	259	-0.505	Distal Intergenic	+	CG	ENSOARG00000020384
17	37050328	37050697	370	-0.505	Distal Intergenic	-	CG	ENSOARG00000001517
18	13897197	13897201	5	-0.505	Distal Intergenic	-	CG	ENSOARG00000010518
10	50885102	50885321	220	-0.505	Distal Intergenic	-	CG	ENSOARG00000015582
3	131673173	131673378	206	-0.505	Distal Intergenic	-	CG	ENSOARG00000016075
15	4236671	4236839	169	-0.505	Distal Intergenic	-	CG	ENSOARG00000016917
5	22801178	22801334	157	-0.505	Distal Intergenic	-	CG	ENSOARG00000017050
10	76848229	76848504	276	-0.505	Distal Intergenic	-	CG	ENSOARG00000017230
10	25014789	25014818	30	-0.505	Intron (ENSOART00000011196/ENSOARG00000010293, intron 3 of 6)	+	CG	ENSOARG00000010293
12	60043618	60043670	53	-0.505	Intron (ENSOART00000019895/ENSOARG00000018286, intron 10 of 14)	+	CG	ENSOARG00000018403
21	10196783	10196907	125	-0.504	Distal Intergenic	+	CG	ENSOARG00000005132
11	42829381	42829509	129	-0.504	Distal Intergenic	+	CG	ENSOARG00000005409
2	144542232	144542393	162	-0.504	Distal Intergenic	+	CG	ENSOARG00000005930
8	50122701	50122712	12	-0.504	Distal Intergenic	+	CG	ENSOARG00000013156
10	8367419	8367444	26	-0.504	Distal Intergenic	-	CG	ENSOARG00000006647
15	10100936	10101129	194	-0.504	Distal Intergenic	-	CG	ENSOARG00000008155
5	10058228	10058638	411	-0.504	Distal Intergenic	-	CG	ENSOARG00000008265
20	9802403	9802476	74	-0.504	Distal Intergenic	-	CG	ENSOARG00000012272
2	132074389	132074544	156	-0.504	Distal Intergenic	-	CG	ENSOARG00000017442
6	13185586	13185593	8	-0.504	Intron (ENSOART00000002540/ENSOARG00000002340, intron 12 of 16)	+	CG	ENSOARG00000002340
14	47198386	47198445	60	-0.504	Intron (ENSOART00000006022/ENSOARG00000005522, intron 21 of 25)	-	CG	ENSOARG00000005536
2	241630055	241630181	127	-0.504	Intron (ENSOART00000007289/ENSOARG00000006709, intron 3 of 6)	+	CG	ENSOARG00000006709
6	104199737	104199829	93	-0.504	Intron (ENSOART00000008097/ENSOARG00000007436, intron 1 of 11)	+	CG	ENSOARG00000007436
22	24334773	24335010	238	-0.504	Intron (ENSOART00000008859/ENSOARG00000008134, intron 1 of 27)	+	CG	ENSOARG00000008134
22	24849483	24849499	17	-0.504	Intron (ENSOART00000008859/ENSOARG00000008134, intron 14 of 27)	+	CG	ENSOARG00000008134
6	57137807	57137827	21	-0.504	Intron (ENSOART00000010707/ENSOARG00000009837, intron 8 of 13)	+	CG	ENSOARG00000009837
1	274670725	274670856	132	-0.504	Intron (ENSOART00000017041/ENSOARG00000015658, intron 3 of 15)	+	CG	ENSOARG00000015658
3	188035341	188035542	202	-0.504	Intron (ENSOART00000021679/ENSOARG00000019909, intron 26 of 56)	+	CG	ENSOARG00000019909
2	63140381	63140463	83	-0.504	Promoter (1-2kb)	-	CG	ENSOARG00000012689
23	3478795	3478814	20	-0.503	Distal Intergenic	+	CG	ENSOARG00000004562
22	49311893	49312045	153	-0.503	Distal Intergenic	+	CG	ENSOARG00000015332
20	14597669	14597800	132	-0.503	Distal Intergenic	-	CG	ENSOARG00000000511
8	79058288	79058294	7	-0.503	Distal Intergenic	-	CG	ENSOARG00000004228
2	161701728	161701751	24	-0.503	Distal Intergenic	-	CG	ENSOARG00000009841
2	57837921	57837945	25	-0.503	Distal Intergenic	-	CG	ENSOARG00000012354
2	126715068	126715125	58	-0.503	Distal Intergenic	-	CG	ENSOARG00000016813
6	94138966	94139043	78	-0.503	Distal Intergenic	-	CG	ENSOARG00000018889
1	195969281	195969347	67	-0.503	Distal Intergenic	-	CG	ENSOARG00000020478
7	47791145	47791369	225	-0.503	Distal Intergenic	-	CG	ENSOARG00000020829
1	100926701	100926793	93	-0.503	Distal Intergenic	-	CG	ENSOARG00000021079
17	35449752	35449943	192	-0.503	Exon (ENSOART00000001153/ENSOARG00000001072, exon 1 of 11)	+	CG	ENSOARG00000001072
18	20175512	20175623	112	-0.503	Exon (ENSOART00000012703/ENSOARG00000011676, exon 12 of 20)	-	CG	ENSOARG00000011676
7	8015745	8015771	27	-0.503	Exon (ENSOART00000018502/ENSOARG00000016987, exon 6 of 14)	+	CG	ENSOARG00000016987
6	13150592	13150771	180	-0.503	Intron (ENSOART00000002189/ENSOARG00000002029, intron 5 of 10)	+	CG	ENSOARG00000002029
X	81304123	81304132	10	-0.503	Intron (ENSOART00000010282/ENSOARG00000009444, intron 4 of 6)	+	CG	ENSOARG00000009444
16	63710472	63710527	56	-0.503	Intron (ENSOART00000015644/ENSOARG00000014361, intron 3 of 23)	+	CG	ENSOARG00000014361
20	7622749	7622804	56	-0.503	Promoter (2-3kb)	+	CG	ENSOARG00000009560
23	26991656	26991725	70	-0.502	Distal Intergenic	+	CG	ENSOARG00000006831
26	17598377	17598390	14	-0.502	Distal Intergenic	+	CG	ENSOARG00000008592
6	2927109	2927167	59	-0.502	Distal Intergenic	+	CG	ENSOARG00000013716
21	35095503	35095791	289	-0.502	Distal Intergenic	+	CG	ENSOARG00000014210
4	43816087	43816163	77	-0.502	Distal Intergenic	+	CG	ENSOARG00000018389
6	72683244	72683279	36	-0.502	Distal Intergenic	-	CG	ENSOARG00000005761
20	36507365	36507564	200	-0.502	Distal Intergenic	-	CG	ENSOARG00000009655
2	81739062	81739112	51	-0.502	Distal Intergenic	-	CG	ENSOARG00000013861
2	92291757	92291961	205	-0.502	Distal Intergenic	-	CG	ENSOARG00000014489
11	10478733	10478840	108	-0.502	Distal Intergenic	-	CG	ENSOARG00000014672
X	23631034	23631302	269	-0.502	Distal Intergenic	-	CG	ENSOARG00000017815
X	34162121	34162150	30	-0.502	Distal Intergenic	-	CG	ENSOARG00000018888
1	13277495	13277499	5	-0.502	Distal Intergenic	-	CG	ENSOARG00000019959
7	56864100	56864268	169	-0.502	Distal Intergenic	-	CG	ENSOARG00000020988
6	70851722	70851863	142	-0.502	Intron (ENSOART00000001637/ENSOARG00000001532, intron 1 of 4)	+	CG	ENSOARG00000001532
15	4115616	4115869	254	-0.502	Intron (ENSOART00000003570/ENSOARG00000003293, intron 5 of 6)	-	CG	ENSOARG00000016917
4	23658064	23658211	148	-0.502	Intron (ENSOART00000008919/ENSOARG00000008198, intron 1 of 12)	-	CG	ENSOARG00000008198
2	39926304	39926352	49	-0.502	Intron (ENSOART00000010752/ENSOARG00000009874, intron 2 of 11)	+	CG	ENSOARG00000009874
4	56776017	56776157	141	-0.501	Distal Intergenic	+	CG	ENSOARG00000003322
24	12691601	12691620	20	-0.501	Distal Intergenic	+	CG	ENSOARG00000007323
2	182613318	182613376	59	-0.501	Distal Intergenic	+	CG	ENSOARG00000012303
6	25359479	25359495	17	-0.501	Distal Intergenic	+	CG	ENSOARG00000015390
3	126630364	126630372	9	-0.501	Distal Intergenic	+	CG	ENSOARG00000016742
5	106377898	106377903	6	-0.501	Distal Intergenic	+	CG	ENSOARG00000018880
4	89076339	89076463	125	-0.501	Distal Intergenic	-	CG	ENSOARG00000001400
18	30519626	30519697	72	-0.501	Distal Intergenic	-	CG	ENSOARG00000001476
25	15028174	15028193	20	-0.501	Distal Intergenic	-	CG	ENSOARG00000004186
26	39077925	39078020	96	-0.501	Distal Intergenic	-	CG	ENSOARG00000004373
X	79638809	79638816	8	-0.501	Distal Intergenic	-	CG	ENSOARG00000008740
4	102765544	102765577	34	-0.501	Distal Intergenic	-	CG	ENSOARG00000011560
1	55119173	55119221	49	-0.501	Distal Intergenic	-	CG	ENSOARG00000013529
11	31120700	31120970	271	-0.501	Distal Intergenic	-	CG	ENSOARG00000015747
7	66466859	66466989	131	-0.501	Distal Intergenic	-	CG	ENSOARG00000021100
16	4644058	4644066	9	-0.501	Intron (ENSOART00000004339/ENSOARG00000003990, intron 1 of 9)	+	CG	ENSOARG00000003990
23	7599665	7599833	169	-0.501	Intron (ENSOART00000005408/ENSOARG00000004967, intron 3 of 7)	-	CG	ENSOARG00000004967
23	29195309	29195342	34	-0.501	Intron (ENSOART00000007508/ENSOARG00000006907, intron 13 of 13)	+	CG	ENSOARG00000006907
2	66728834	66728857	24	-0.501	Intron (ENSOART00000014120/ENSOARG00000012988, intron 10 of 12)	+	CG	ENSOARG00000012988
3	100487454	100487463	10	-0.501	Intron (ENSOART00000014450/ENSOARG00000013285, intron 18 of 20)	-	CG	ENSOARG00000013285
3	117587260	117587287	28	-0.501	Intron (ENSOART00000016571/ENSOARG00000015220, intron 29 of 29)	-	CG	ENSOARG00000015220
12	58728482	58728595	114	-0.501	Intron (ENSOART00000018169/ENSOARG00000016678, intron 3 of 15)	+	CG	ENSOARG00000016678
1	74080813	74080909	97	-0.501	Intron (ENSOART00000019097/ENSOARG00000017549, intron 15 of 22)	-	CG	ENSOARG00000017549
14	21592821	21592894	74	-0.501	Intron (ENSOART00000019523/ENSOARG00000017939, intron 1 of 8)	+	CG	ENSOARG00000017939
1	170808336	170808342	7	-0.501	Intron (ENSOART00000020507/ENSOARG00000018829, intron 2 of 16)	+	CG	ENSOARG00000018866
15	26649958	26650131	174	-0.5	Distal Intergenic	+	CG	ENSOARG00000001643
20	49951724	49951862	139	-0.5	Distal Intergenic	+	CG	ENSOARG00000002773
26	12227325	12227517	193	-0.5	Distal Intergenic	+	CG	ENSOARG00000006939
26	19089721	19089774	54	-0.5	Distal Intergenic	+	CG	ENSOARG00000009585
8	46685456	46685464	9	-0.5	Distal Intergenic	+	CG	ENSOARG00000012321
19	45928692	45928753	62	-0.5	Distal Intergenic	+	CG	ENSOARG00000015697
7	1202175	1202282	108	-0.5	Distal Intergenic	+	CG	ENSOARG00000016161
18	8761173	8761440	268	-0.5	Distal Intergenic	+	CG	ENSOARG00000017297
9	24010444	24010548	105	-0.5	Distal Intergenic	-	CG	ENSOARG00000007914
11	58255410	58255556	147	-0.5	Distal Intergenic	-	CG	ENSOARG00000013779
25	40579139	40579156	18	-0.5	Intron (ENSOART00000000468/ENSOARG00000000438, intron 14 of 14)	-	CG	ENSOARG00000000438
1	229858097	229858134	38	-0.5	Intron (ENSOART00000003422/ENSOARG00000003146, intron 11 of 15)	-	CG	ENSOARG00000003146
8	84876777	84876965	189	-0.5	Intron (ENSOART00000005223/ENSOARG00000004794, intron 1 of 1)	-	CG	ENSOARG00000002798
12	65157429	65157527	99	-0.5	Intron (ENSOART00000005655/ENSOARG00000005151, intron 42 of 106)	+	CG	ENSOARG00000006194
20	31907562	31907588	27	-0.5	Intron (ENSOART00000005927/ENSOARG00000005436, intron 7 of 21)	+	CG	ENSOARG00000005436
1	112320788	112320878	91	-0.5	Intron (ENSOART00000011809/ENSOARG00000010852, intron 1 of 17)	+	CG	ENSOARG00000010852
12	71815217	71815221	5	-0.5	Intron (ENSOART00000014294/ENSOARG00000013143, intron 3 of 30)	+	CG	ENSOARG00000013143
7	26689661	26689702	42	-0.5	Intron (ENSOART00000021735/ENSOARG00000019965, intron 6 of 13)	+	CG	ENSOARG00000019967
14	41500265	41500313	49	-0.499	Distal Intergenic	+	CG	ENSOARG00000004132
23	26554407	26554436	30	-0.499	Distal Intergenic	+	CG	ENSOARG00000006831
2	169320967	169320990	24	-0.499	Distal Intergenic	+	CG	ENSOARG00000010178
8	43235568	43235581	14	-0.499	Distal Intergenic	+	CG	ENSOARG00000012177
22	509907	509944	38	-0.499	Distal Intergenic	+	CG	ENSOARG00000012946
19	2419181	2419189	9	-0.499	Distal Intergenic	+	CG	ENSOARG00000014502
19	4843834	4844128	295	-0.499	Distal Intergenic	+	CG	ENSOARG00000014726
1	130457969	130458135	167	-0.499	Distal Intergenic	+	CG	ENSOARG00000015449
18	8752487	8752751	265	-0.499	Distal Intergenic	+	CG	ENSOARG00000017297
14	23121392	23121595	204	-0.499	Distal Intergenic	+	CG	ENSOARG00000018027
1	229499395	229499424	30	-0.499	Distal Intergenic	-	CG	ENSOARG00000003018
23	46979567	46979781	215	-0.499	Distal Intergenic	-	CG	ENSOARG00000003542
24	5250528	5250767	240	-0.499	Distal Intergenic	-	CG	ENSOARG00000005096
26	7534234	7534307	74	-0.499	Distal Intergenic	-	CG	ENSOARG00000006863
2	151409460	151409675	216	-0.499	Distal Intergenic	-	CG	ENSOARG00000007945
10	86167555	86167607	53	-0.499	Distal Intergenic	-	CG	ENSOARG00000008588
22	31816620	31816820	201	-0.499	Distal Intergenic	-	CG	ENSOARG00000011700
13	9917379	9917483	105	-0.499	Distal Intergenic	-	CG	ENSOARG00000011950
3	192282097	192282168	72	-0.499	Distal Intergenic	-	CG	ENSOARG00000020117
1	100958392	100958418	27	-0.499	Distal Intergenic	-	CG	ENSOARG00000021080
18	29152178	29152403	226	-0.499	Intron (ENSOART00000000231/ENSOARG00000000224, intron 3 of 12)	+	CG	ENSOARG00000000224
X	74473827	74474083	257	-0.499	Intron (ENSOART00000002927/ENSOARG00000002707, intron 1 of 9)	+	CG	ENSOARG00000002707
13	72686743	72686759	17	-0.499	Intron (ENSOART00000004674/ENSOARG00000004293, intron 3 of 4)	+	CG	ENSOARG00000004293
16	56282545	56282568	24	-0.499	Intron (ENSOART00000014112/ENSOARG00000012972, intron 16 of 40)	+	CG	ENSOARG00000012972
17	1328753	1328931	179	-0.499	Intron (ENSOART00000017701/ENSOARG00000016252, intron 1 of 20)	+	CG	ENSOARG00000016252
6	12149902	12149915	14	-0.499	Intron (ENSOART00000020042/ENSOARG00000018416, intron 4 of 19)	+	CG	ENSOARG00000018416
1	16832781	16833074	294	-0.498	5' UTR	+	CG	ENSOARG00000020435
10	63074262	63074329	68	-0.498	Distal Intergenic	+	CG	ENSOARG00000000522
23	29408670	29408705	36	-0.498	Distal Intergenic	+	CG	ENSOARG00000003873
12	36046448	36046554	107	-0.498	Distal Intergenic	+	CG	ENSOARG00000011858
11	48858049	48858072	24	-0.498	Distal Intergenic	+	CG	ENSOARG00000015809
10	61726166	61726303	138	-0.498	Distal Intergenic	-	CG	ENSOARG00000000481
1	242796317	242796640	324	-0.498	Distal Intergenic	-	CG	ENSOARG00000005732
6	82661315	82661384	70	-0.498	Distal Intergenic	-	CG	ENSOARG00000006685
19	26485209	26485339	131	-0.498	Distal Intergenic	-	CG	ENSOARG00000009067
9	1423228	1423269	42	-0.498	Distal Intergenic	-	CG	ENSOARG00000011143
11	10459261	10459492	232	-0.498	Distal Intergenic	-	CG	ENSOARG00000014672
3	186794870	186794950	81	-0.498	Distal Intergenic	-	CG	ENSOARG00000019677
7	24476465	24476522	58	-0.498	Exon (ENSOART00000021572/ENSOARG00000019812, exon 7 of 7)	+	CG	ENSOARG00000019812
2	148592838	148592989	152	-0.498	Intron (ENSOART00000007745/ENSOARG00000007110, intron 13 of 29)	+	CG	ENSOARG00000007110
10	13771102	13771233	132	-0.498	Intron (ENSOART00000008113/ENSOARG00000007449, intron 3 of 15)	+	CG	ENSOARG00000007432
5	10393643	10393879	237	-0.498	Intron (ENSOART00000009374/ENSOARG00000008583, intron 17 of 51)	+	CG	ENSOARG00000016333
4	66336559	66336574	16	-0.498	Intron (ENSOART00000009522/ENSOARG00000008738, intron 1 of 6)	+	CG	ENSOARG00000008738
1	265059364	265059544	181	-0.498	Intron (ENSOART00000014799/ENSOARG00000013599, intron 2 of 12)	-	CG	ENSOARG00000013599
6	116770630	116770704	75	-0.498	Intron (ENSOART00000018134/ENSOARG00000016644, intron 6 of 13)	-	CG	ENSOARG00000016644
6	53428926	53429020	95	-0.497	Distal Intergenic	+	CG	ENSOARG00000009174
6	1838844	1838999	156	-0.497	Distal Intergenic	+	CG	ENSOARG00000013445
19	20288346	20288396	51	-0.497	Distal Intergenic	+	CG	ENSOARG00000014064
18	9407869	9408005	137	-0.497	Distal Intergenic	+	CG	ENSOARG00000017297
1	177266002	177266185	184	-0.497	Distal Intergenic	+	CG	ENSOARG00000019616
8	79123094	79123319	226	-0.497	Distal Intergenic	-	CG	ENSOARG00000004228
18	46069902	46070157	256	-0.497	Distal Intergenic	-	CG	ENSOARG00000008179
15	52036263	52036281	19	-0.497	Distal Intergenic	-	CG	ENSOARG00000010038
16	36081180	36081373	194	-0.497	Distal Intergenic	-	CG	ENSOARG00000010082
21	29498519	29498728	210	-0.497	Distal Intergenic	-	CG	ENSOARG00000013028
12	23251663	23251751	89	-0.497	Distal Intergenic	-	CG	ENSOARG00000013213
5	69272836	69272855	20	-0.497	Distal Intergenic	-	CG	ENSOARG00000013403
9	91140375	91140387	13	-0.497	Distal Intergenic	-	CG	ENSOARG00000014453
21	14236651	14236690	40	-0.497	Distal Intergenic	-	CG	ENSOARG00000015261
10	65360633	65360640	8	-0.497	Distal Intergenic	-	CG	ENSOARG00000017184
5	103540969	103541205	237	-0.497	Distal Intergenic	-	CG	ENSOARG00000018761
3	191897164	191897188	25	-0.497	Distal Intergenic	-	CG	ENSOARG00000020117
18	65901645	65901669	25	-0.497	Exon (ENSOART00000005118/ENSOARG00000004698, exon 10 of 23)	+	CG	ENSOARG00000004698
1	270307566	270307594	29	-0.497	Exon (ENSOART00000016313/ENSOARG00000014974, exon 14 of 20)	-	CG	ENSOARG00000015031
10	74746669	74746695	27	-0.497	Intron (ENSOART00000003297/ENSOARG00000003037, intron 10 of 25)	-	CG	ENSOARG00000003190
11	28528934	28529131	198	-0.497	Intron (ENSOART00000003620/ENSOARG00000003334, intron 2 of 4)	-	CG	ENSOARG00000003306
21	37879345	37879369	25	-0.497	Intron (ENSOART00000006653/ENSOARG00000006110, intron 4 of 8)	-	CG	ENSOARG00000006110
10	20952889	20953012	124	-0.497	Intron (ENSOART00000009603/ENSOARG00000008823, intron 3 of 3)	+	CG	ENSOARG00000008823
5	70370484	70370519	36	-0.497	Intron (ENSOART00000014952/ENSOARG00000013743, intron 4 of 9)	-	CG	ENSOARG00000013743
4	40091285	40091319	35	-0.497	Intron (ENSOART00000018402/ENSOARG00000016894, intron 6 of 16)	+	CG	ENSOARG00000016894
7	58072685	58072814	130	-0.497	Intron (ENSOART00000022885/ENSOARG00000021006, intron 3 of 12)	+	CG	ENSOARG00000021006
13	69256858	69256872	15	-0.496	Distal Intergenic	+	CG	ENSOARG00000001406
1	222752041	222752080	40	-0.496	Distal Intergenic	+	CG	ENSOARG00000001795
23	48297840	48297953	114	-0.496	Distal Intergenic	+	CG	ENSOARG00000003754
23	18422963	18423011	49	-0.496	Distal Intergenic	+	CG	ENSOARG00000005249
6	5934964	5935149	186	-0.496	Distal Intergenic	+	CG	ENSOARG00000016017
1	22868235	22868487	253	-0.496	Distal Intergenic	-	CG	ENSOARG00000003993
10	3866727	3866992	266	-0.496	Distal Intergenic	-	CG	ENSOARG00000006472
2	166618908	166618932	25	-0.496	Distal Intergenic	-	CG	ENSOARG00000009938
9	90611923	90611936	14	-0.496	Distal Intergenic	-	CG	ENSOARG00000014453
5	21294985	21295163	179	-0.496	Distal Intergenic	-	CG	ENSOARG00000016586
1	196437948	196438019	72	-0.496	Distal Intergenic	-	CG	ENSOARG00000020481
16	18617056	18617087	32	-0.496	Intron (ENSOART00000007757/ENSOARG00000007132, intron 2 of 10)	+	CG	ENSOARG00000007132
12	13500010	13500164	155	-0.496	Intron (ENSOART00000011011/ENSOARG00000010120, intron 3 of 6)	+	CG	ENSOARG00000010120
19	23047323	23047355	33	-0.496	Promoter (<=1kb)	-	CG	ENSOARG00000008631
7	84355413	84355516	104	-0.495	Distal Intergenic	+	CG	ENSOARG00000002105
12	2603126	2603233	108	-0.495	Distal Intergenic	+	CG	ENSOARG00000003960
2	15646206	15646247	42	-0.495	Distal Intergenic	+	CG	ENSOARG00000007169
4	21080898	21080906	9	-0.495	Distal Intergenic	+	CG	ENSOARG00000008124
8	33274999	33275129	131	-0.495	Distal Intergenic	+	CG	ENSOARG00000011435
2	183963376	183963426	51	-0.495	Distal Intergenic	+	CG	ENSOARG00000012857
5	89710046	89710320	275	-0.495	Distal Intergenic	+	CG	ENSOARG00000016709
7	12494803	12494811	9	-0.495	Distal Intergenic	+	CG	ENSOARG00000018084
4	53155610	53155655	46	-0.495	Distal Intergenic	-	CG	ENSOARG00000001754
15	39242807	39242828	22	-0.495	Distal Intergenic	-	CG	ENSOARG00000008015
6	108669277	108669474	198	-0.495	Distal Intergenic	-	CG	ENSOARG00000008465
22	27672887	27672981	95	-0.495	Distal Intergenic	-	CG	ENSOARG00000008709
13	30937682	30937837	156	-0.495	Distal Intergenic	-	CG	ENSOARG00000011498
22	5463557	5463586	30	-0.495	Distal Intergenic	-	CG	ENSOARG00000013447
4	106185525	106185592	68	-0.495	Distal Intergenic	-	CG	ENSOARG00000017997
1	10954503	10954528	26	-0.495	Exon (ENSOART00000021436/ENSOARG00000019685, exon 13 of 14)	-	CG	ENSOARG00000000604
13	72883364	72883459	96	-0.495	Intron (ENSOART00000004981/ENSOARG00000004578, intron 7 of 13)	+	CG	ENSOARG00000004578
20	31509584	31509743	160	-0.495	Intron (ENSOART00000005292/ENSOARG00000004854, intron 1 of 16)	+	CG	ENSOARG00000004854
4	70952212	70952217	6	-0.495	Intron (ENSOART00000011428/ENSOARG00000010496, intron 9 of 21)	+	CG	ENSOARG00000010496
8	32320474	32320552	79	-0.495	Intron (ENSOART00000012439/ENSOARG00000011435, intron 12 of 24)	+	CG	ENSOARG00000011435
18	56060830	56061053	224	-0.495	Intron (ENSOART00000014100/ENSOARG00000012969, intron 2 of 16)	+	CG	ENSOARG00000012969
11	49276763	49277049	287	-0.495	Intron (ENSOART00000017443/ENSOARG00000016006, intron 32 of 37)	-	CG	ENSOARG00000016006
3	23661808	23661892	85	-0.495	Intron (ENSOART00000017797/ENSOARG00000016340, intron 20 of 49)	-	CG	ENSOARG00000016340
5	13248808	13248892	85	-0.495	Intron (ENSOART00000019290/ENSOARG00000017725, intron 1 of 4)	-	CG	ENSOARG00000017725
3	142309149	142309397	249	-0.495	Intron (ENSOART00000021392/ENSOARG00000019645, intron 4 of 7)	-	CG	ENSOARG00000019645
22	19760960	19761034	75	-0.495	Promoter (1-2kb)	-	CG	ENSOARG00000012426
26	43219536	43219568	33	-0.494	Distal Intergenic	+	CG	ENSOARG00000004647
4	115621027	115621063	37	-0.494	Distal Intergenic	+	CG	ENSOARG00000006061
15	49167566	49167623	58	-0.494	Distal Intergenic	+	CG	ENSOARG00000006682
12	32252380	32252452	73	-0.494	Distal Intergenic	+	CG	ENSOARG00000006697
6	85427545	85427593	49	-0.494	Distal Intergenic	+	CG	ENSOARG00000007780
13	47313481	47313494	14	-0.494	Distal Intergenic	+	CG	ENSOARG00000017942
1	15640707	15640740	34	-0.494	Distal Intergenic	+	CG	ENSOARG00000020357
22	26867076	26867086	11	-0.494	Distal Intergenic	-	CG	ENSOARG00000008709
10	64121760	64121772	13	-0.494	Distal Intergenic	-	CG	ENSOARG00000017177
1	88699792	88699861	70	-0.494	Distal Intergenic	-	CG	ENSOARG00000019656
10	20914977	20914983	7	-0.494	Intron (ENSOART00000009603/ENSOARG00000008823, intron 1 of 3)	+	CG	ENSOARG00000008823
1	258328149	258328185	37	-0.494	Intron (ENSOART00000010877/ENSOARG00000009979, intron 13 of 30)	+	CG	ENSOARG00000009912
9	61720808	61720915	108	-0.494	Intron (ENSOART00000011753/ENSOARG00000010810, intron 5 of 6)	+	CG	ENSOARG00000010810
10	77338573	77338742	170	-0.494	Promoter (<=1kb)	+	CG	ENSOARG00000004848
9	78736483	78736554	72	-0.494	Promoter (1-2kb)	-	CG	ENSOARG00000003535
18	61068872	61069068	197	-0.493	Distal Intergenic	+	CG	ENSOARG00000000106
15	71553098	71553203	106	-0.493	Distal Intergenic	+	CG	ENSOARG00000000187
26	30965739	30966002	264	-0.493	Distal Intergenic	+	CG	ENSOARG00000000631
14	61397291	61397479	189	-0.493	Distal Intergenic	+	CG	ENSOARG00000003454
9	80784370	80784440	71	-0.493	Distal Intergenic	+	CG	ENSOARG00000005563
9	11475335	11475447	113	-0.493	Distal Intergenic	+	CG	ENSOARG00000012293
13	13547536	13547554	19	-0.493	Distal Intergenic	+	CG	ENSOARG00000014052
18	25562014	25562265	252	-0.493	Distal Intergenic	+	CG	ENSOARG00000015492
1	167653514	167653650	137	-0.493	Distal Intergenic	+	CG	ENSOARG00000018737
21	17830083	17830098	16	-0.493	Distal Intergenic	-	CG	ENSOARG00000007178
4	21857872	21857928	57	-0.493	Distal Intergenic	-	CG	ENSOARG00000007763
12	66700983	66701080	98	-0.493	Distal Intergenic	-	CG	ENSOARG00000008173
8	19944568	19944581	14	-0.493	Distal Intergenic	-	CG	ENSOARG00000008638
9	59644014	59644032	19	-0.493	Distal Intergenic	-	CG	ENSOARG00000010177
1	185607364	185607497	134	-0.493	Distal Intergenic	-	CG	ENSOARG00000020173
1	36815244	36815330	87	-0.493	Intron (ENSOART00000009808/ENSOARG00000008998, intron 27 of 44)	+	CG	ENSOARG00000008998
18	20768753	20768778	26	-0.493	Intron (ENSOART00000013285/ENSOARG00000012205, intron 6 of 22)	+	CG	ENSOARG00000012205
3	102520612	102520738	127	-0.493	Intron (ENSOART00000014681/ENSOARG00000013496, intron 11 of 14)	-	CG	ENSOARG00000013516
10	44712278	44712526	249	-0.493	Intron (ENSOART00000016475/ENSOARG00000015136, intron 9 of 9)	-	CG	ENSOARG00000015136
3	130288886	130289004	119	-0.493	Intron (ENSOART00000017310/ENSOARG00000015895, intron 1 of 30)	+	CG	ENSOARG00000015895
6	107295469	107295483	15	-0.493	Promoter (<=1kb)	-	CG	ENSOARG00000008320
1	119229995	119230028	34	-0.492	Distal Intergenic	+	CG	ENSOARG00000007595
2	35123402	35123504	103	-0.492	Distal Intergenic	+	CG	ENSOARG00000008920
2	173108349	173108508	160	-0.492	Distal Intergenic	+	CG	ENSOARG00000010462
19	42324329	42324606	278	-0.492	Distal Intergenic	+	CG	ENSOARG00000011949
2	186499474	186499578	105	-0.492	Distal Intergenic	+	CG	ENSOARG00000013396
1	63703110	63703142	33	-0.492	Distal Intergenic	+	CG	ENSOARG00000014936
4	79161278	79161356	79	-0.492	Distal Intergenic	+	CG	ENSOARG00000017420
7	25429284	25429394	111	-0.492	Distal Intergenic	+	CG	ENSOARG00000019901
8	67035908	67035958	51	-0.492	Distal Intergenic	-	CG	ENSOARG00000001505
7	98176879	98177040	162	-0.492	Distal Intergenic	-	CG	ENSOARG00000003363
2	17560689	17560751	63	-0.492	Distal Intergenic	-	CG	ENSOARG00000007283
1	249164990	249165143	154	-0.492	Distal Intergenic	-	CG	ENSOARG00000007703
8	19301918	19302123	206	-0.492	Distal Intergenic	-	CG	ENSOARG00000008585
19	33111870	33112064	195	-0.492	Distal Intergenic	-	CG	ENSOARG00000010424
1	145960078	145960177	100	-0.492	Distal Intergenic	-	CG	ENSOARG00000016827
6	6869821	6869949	129	-0.492	Distal Intergenic	-	CG	ENSOARG00000017247
1	211831864	211832103	240	-0.492	Distal Intergenic	-	CG	ENSOARG00000020731
8	76202000	76202125	126	-0.492	Intron (ENSOART00000003875/ENSOARG00000003537, intron 143 of 144)	-	CG	ENSOARG00000003537
23	5050021	5050034	14	-0.492	Intron (ENSOART00000005219/ENSOARG00000004791, intron 3 of 9)	+	CG	ENSOARG00000004791
19	21566554	21566584	31	-0.492	Intron (ENSOART00000008881/ENSOARG00000008132, intron 24 of 57)	-	CG	ENSOARG00000008132
9	727105	727209	105	-0.492	Intron (ENSOART00000012040/ENSOARG00000011066, intron 6 of 16)	+	CG	ENSOARG00000020130
7	97506408	97506440	33	-0.491	Distal Intergenic	+	CG	ENSOARG00000003343
3	71409325	71409348	24	-0.491	Distal Intergenic	+	CG	ENSOARG00000004203
12	6816894	6817094	201	-0.491	Distal Intergenic	+	CG	ENSOARG00000004974
21	10204757	10204798	42	-0.491	Distal Intergenic	+	CG	ENSOARG00000005132
3	83217705	83217777	73	-0.491	Distal Intergenic	+	CG	ENSOARG00000007679
9	26571958	26572163	206	-0.491	Distal Intergenic	+	CG	ENSOARG00000008153
6	18852008	18852171	164	-0.491	Distal Intergenic	+	CG	ENSOARG00000009048
8	43422174	43422269	96	-0.491	Distal Intergenic	+	CG	ENSOARG00000012207
20	23691140	23691149	10	-0.491	Distal Intergenic	+	CG	ENSOARG00000012828
9	92725354	92725367	14	-0.491	Distal Intergenic	+	CG	ENSOARG00000014505
3	139729762	139729788	27	-0.491	Distal Intergenic	+	CG	ENSOARG00000019480
1	93067308	93067333	26	-0.491	Distal Intergenic	+	CG	ENSOARG00000020241
3	154186287	154186361	75	-0.491	Distal Intergenic	-	CG	ENSOARG00000002947
6	100738505	100738675	171	-0.491	Distal Intergenic	-	CG	ENSOARG00000003887
21	20173957	20174005	49	-0.491	Distal Intergenic	-	CG	ENSOARG00000007473
2	149773091	149773104	14	-0.491	Distal Intergenic	-	CG	ENSOARG00000007604
2	75359893	75359987	95	-0.491	Distal Intergenic	-	CG	ENSOARG00000013719
9	53038172	53038403	232	-0.491	Distal Intergenic	-	CG	ENSOARG00000014583
21	46251273	46251362	90	-0.491	Distal Intergenic	-	CG	ENSOARG00000017559
6	7795364	7795664	301	-0.491	Distal Intergenic	-	CG	ENSOARG00000017811
2	177494923	177495167	245	-0.491	Distal Intergenic	-	CG	ENSOARG00000019710
3	41580426	41580433	8	-0.491	Distal Intergenic	-	CG	ENSOARG00000019962
25	5985398	5985614	217	-0.491	Intron (ENSOART00000003666/ENSOARG00000003366, intron 8 of 33)	+	CG	ENSOARG00000003337
11	35827932	35827975	44	-0.491	Intron (ENSOART00000004830/ENSOARG00000004440, intron 5 of 6)	+	CG	ENSOARG00000004440
22	16194874	16194904	31	-0.491	Intron (ENSOART00000006595/ENSOARG00000006055, intron 31 of 31)	-	CG	ENSOARG00000006055
4	24997085	24997099	15	-0.491	Intron (ENSOART00000009145/ENSOARG00000008410, intron 10 of 10)	-	CG	ENSOARG00000008410
18	55996879	55996938	60	-0.491	Intron (ENSOART00000014100/ENSOARG00000012969, intron 2 of 16)	+	CG	ENSOARG00000012969
10	44710019	44710037	19	-0.491	Intron (ENSOART00000016475/ENSOARG00000015136, intron 9 of 9)	-	CG	ENSOARG00000015136
11	11756087	11756115	29	-0.491	Intron (ENSOART00000018247/ENSOARG00000016753, intron 17 of 22)	-	CG	ENSOARG00000016753
3	144341763	144341820	58	-0.491	Intron (ENSOART00000021512/ENSOARG00000019755, intron 3 of 11)	-	CG	ENSOARG00000019778
14	33108943	33109161	219	-0.49	Distal Intergenic	+	CG	ENSOARG00000001849
8	70677586	70677708	123	-0.49	Distal Intergenic	+	CG	ENSOARG00000002177
11	35505488	35505665	178	-0.49	Distal Intergenic	+	CG	ENSOARG00000003280
12	40928344	40928349	6	-0.49	Distal Intergenic	+	CG	ENSOARG00000004576
18	88646	88654	9	-0.49	Distal Intergenic	+	CG	ENSOARG00000009028
20	37238575	37238667	93	-0.49	Distal Intergenic	+	CG	ENSOARG00000009905
3	89973823	89973903	81	-0.49	Distal Intergenic	+	CG	ENSOARG00000010279
9	92951356	92951401	46	-0.49	Distal Intergenic	+	CG	ENSOARG00000014505
3	220551429	220551448	20	-0.49	Distal Intergenic	+	CG	ENSOARG00000019427
1	214855518	214855681	164	-0.49	Distal Intergenic	+	CG	ENSOARG00000020771
1	223483955	223484069	115	-0.49	Distal Intergenic	-	CG	ENSOARG00000001842
15	8125507	8125718	212	-0.49	Distal Intergenic	-	CG	ENSOARG00000007560
21	29452590	29452687	98	-0.49	Distal Intergenic	-	CG	ENSOARG00000013028
15	43982795	43982811	17	-0.49	Distal Intergenic	-	CG	ENSOARG00000015152
1	95341019	95341165	147	-0.49	Distal Intergenic	-	CG	ENSOARG00000020376
18	30489473	30489514	42	-0.49	Intron (ENSOART00000001542/ENSOARG00000001439, intron 8 of 10)	+	CG	ENSOARG00000001439
3	92466011	92466117	107	-0.49	Intron (ENSOART00000012079/ENSOARG00000011111, intron 4 of 5)	-	CG	ENSOARG00000016449
11	17653759	17653798	40	-0.49	Intron (ENSOART00000012981/ENSOARG00000011933, intron 5 of 10)	-	CG	ENSOARG00000011933
13	18012865	18013040	176	-0.49	Intron (ENSOART00000018716/ENSOARG00000017196, intron 21 of 23)	-	CG	ENSOARG00000004445
19	514378	514391	14	-0.49	Promoter (1-2kb)	+	CG	ENSOARG00000013649
18	60859443	60859597	155	-0.489	Distal Intergenic	+	CG	ENSOARG00000000106
5	14201477	14201560	84	-0.489	Distal Intergenic	+	CG	ENSOARG00000002387
12	65965470	65965635	166	-0.489	Distal Intergenic	+	CG	ENSOARG00000007935
14	53773602	53773627	26	-0.489	Distal Intergenic	+	CG	ENSOARG00000011460
5	69368876	69368957	82	-0.489	Distal Intergenic	+	CG	ENSOARG00000013532
2	79431200	79431337	138	-0.489	Distal Intergenic	+	CG	ENSOARG00000013796
19	41156259	41156423	165	-0.489	Distal Intergenic	+	CG	ENSOARG00000014113
21	35115754	35116180	427	-0.489	Distal Intergenic	+	CG	ENSOARG00000014210
17	1115723	1115781	59	-0.489	Distal Intergenic	+	CG	ENSOARG00000016252
7	7138400	7138420	21	-0.489	Distal Intergenic	+	CG	ENSOARG00000016846
7	47330880	47330897	18	-0.489	Distal Intergenic	-	CG	ENSOARG00000000893
4	115040079	115040108	30	-0.489	Distal Intergenic	-	CG	ENSOARG00000006052
4	71349373	71349545	173	-0.489	Distal Intergenic	-	CG	ENSOARG00000010839
1	261805106	261805162	57	-0.489	Distal Intergenic	-	CG	ENSOARG00000011274
22	6413246	6413485	240	-0.489	Distal Intergenic	-	CG	ENSOARG00000013579
13	54872864	54872909	46	-0.489	Distal Intergenic	-	CG	ENSOARG00000015131
22	48764324	48764378	55	-0.489	Distal Intergenic	-	CG	ENSOARG00000015276
X	119097512	119097523	12	-0.489	Distal Intergenic	-	CG	ENSOARG00000018114
4	111530630	111530650	21	-0.489	Distal Intergenic	-	CG	ENSOARG00000018882
6	94428773	94428805	33	-0.489	Distal Intergenic	-	CG	ENSOARG00000018889
8	38778250	38778535	286	-0.489	Distal Intergenic	-	CG	ENSOARG00000019980
22	37724620	37724637	18	-0.489	Distal Intergenic	-	CG	ENSOARG00000025163
25	42398754	42398787	34	-0.489	Intron (ENSOART00000001675/ENSOARG00000001560, intron 3 of 9)	+	CG	ENSOARG00000001468
11	28043760	28043807	48	-0.489	Intron (ENSOART00000002905/ENSOARG00000002682, intron 2 of 15)	+	CG	ENSOARG00000002682
23	7489710	7489729	20	-0.489	Intron (ENSOART00000005408/ENSOARG00000004967, intron 1 of 7)	+	CG	ENSOARG00000004958
24	9581494	9581536	43	-0.489	Intron (ENSOART00000006644/ENSOARG00000006106, intron 9 of 19)	-	CG	ENSOARG00000006242
11	37902732	37902832	101	-0.489	Intron (ENSOART00000007836/ENSOARG00000007203, intron 10 of 10)	-	CG	ENSOARG00000007296
2	150454104	150454275	172	-0.489	Intron (ENSOART00000008337/ENSOARG00000007659, intron 1 of 6)	-	CG	ENSOARG00000007659
5	10622892	10623115	224	-0.489	Intron (ENSOART00000010382/ENSOARG00000009535, intron 7 of 7)	-	CG	ENSOARG00000009535
19	5246487	5246937	451	-0.489	Intron (ENSOART00000016039/ENSOARG00000014735, intron 4 of 13)	-	CG	ENSOARG00000014735
1	189896715	189896746	32	-0.489	Intron (ENSOART00000022189/ENSOARG00000020377, intron 21 of 25)	-	CG	ENSOARG00000020377
X	60443619	60443637	19	-0.489	Promoter (2-3kb)	+	CG	ENSOARG00000016602
26	31122891	31122912	22	-0.488	Distal Intergenic	+	CG	ENSOARG00000000631
25	4454503	4454599	97	-0.488	Distal Intergenic	+	CG	ENSOARG00000003291
26	5388212	5388298	87	-0.488	Distal Intergenic	+	CG	ENSOARG00000004065
23	4871100	4871192	93	-0.488	Distal Intergenic	+	CG	ENSOARG00000004791
18	50587274	50587393	120	-0.488	Distal Intergenic	+	CG	ENSOARG00000008960
5	63721040	63721109	70	-0.488	Distal Intergenic	+	CG	ENSOARG00000010435
9	11775783	11775795	13	-0.488	Distal Intergenic	+	CG	ENSOARG00000012320
3	128708847	128708868	22	-0.488	Distal Intergenic	+	CG	ENSOARG00000015768
5	84451500	84451517	18	-0.488	Distal Intergenic	+	CG	ENSOARG00000015978
6	11363394	11363585	192	-0.488	Distal Intergenic	-	CG	ENSOARG00000000283
1	223604734	223604747	14	-0.488	Distal Intergenic	-	CG	ENSOARG00000001842
4	59490611	59490646	36	-0.488	Distal Intergenic	-	CG	ENSOARG00000003499
4	18809471	18809725	255	-0.488	Distal Intergenic	-	CG	ENSOARG00000006367
10	10120087	10120166	80	-0.488	Distal Intergenic	-	CG	ENSOARG00000006695
9	5990038	5990081	44	-0.488	Distal Intergenic	-	CG	ENSOARG00000012209
X	99947690	99947803	114	-0.488	Distal Intergenic	-	CG	ENSOARG00000013416
22	46168498	46168514	17	-0.488	Distal Intergenic	-	CG	ENSOARG00000014062
9	37522136	37522377	242	-0.488	Distal Intergenic	-	CG	ENSOARG00000015464
10	66398076	66398177	102	-0.488	Intron (ENSOART00000000591/ENSOARG00000000553, intron 1 of 5)	+	CG	ENSOARG00000000553
10	69317978	69318106	129	-0.488	Intron (ENSOART00000000612/ENSOARG00000000573, intron 1 of 4)	+	CG	ENSOARG00000000573
2	139037873	139038136	264	-0.488	Intron (ENSOART00000003928/ENSOARG00000003592, intron 15 of 78)	+	CG	ENSOARG00000003592
1	28917794	28917982	189	-0.488	Intron (ENSOART00000008059/ENSOARG00000007404, intron 19 of 21)	+	CG	ENSOARG00000007424
16	28348808	28349097	290	-0.488	Intron (ENSOART00000009151/ENSOARG00000008401, intron 4 of 26)	+	CG	ENSOARG00000008462
13	36250563	36250589	27	-0.488	Intron (ENSOART00000017949/ENSOARG00000016475, intron 26 of 33)	-	CG	ENSOARG00000016475
1	5059221	5059377	157	-0.488	Intron (ENSOART00000020837/ENSOARG00000019132, intron 9 of 21)	-	CG	ENSOARG00000000331
26	32027138	32027145	8	-0.487	Distal Intergenic	+	CG	ENSOARG00000001359
23	48324149	48324181	33	-0.487	Distal Intergenic	+	CG	ENSOARG00000003754
26	19987162	19987180	19	-0.487	Distal Intergenic	+	CG	ENSOARG00000004149
3	73362572	73362807	236	-0.487	Distal Intergenic	+	CG	ENSOARG00000004226
12	64723966	64724145	180	-0.487	Distal Intergenic	+	CG	ENSOARG00000005151
16	36331688	36331923	236	-0.487	Distal Intergenic	+	CG	ENSOARG00000010157
5	64519866	64520023	158	-0.487	Distal Intergenic	+	CG	ENSOARG00000010512
18	19711297	19711584	288	-0.487	Distal Intergenic	+	CG	ENSOARG00000011286
4	5071221	5071480	260	-0.487	Distal Intergenic	+	CG	ENSOARG00000013819
19	10254115	10254148	34	-0.487	Distal Intergenic	+	CG	ENSOARG00000016501
3	25989223	25989283	61	-0.487	Distal Intergenic	+	CG	ENSOARG00000016776
1	1638782	1638882	101	-0.487	Distal Intergenic	+	CG	ENSOARG00000018675
9	2441439	2441493	55	-0.487	Distal Intergenic	+	CG	ENSOARG00000020136
1	203186798	203186817	20	-0.487	Distal Intergenic	+	CG	ENSOARG00000020668
3	67369649	67369687	39	-0.487	Distal Intergenic	-	CG	ENSOARG00000001945
7	96311567	96311640	74	-0.487	Distal Intergenic	-	CG	ENSOARG00000003058
4	15061116	15061234	119	-0.487	Distal Intergenic	-	CG	ENSOARG00000004686
15	8094958	8095335	378	-0.487	Distal Intergenic	-	CG	ENSOARG00000007560
2	150517773	150518080	308	-0.487	Distal Intergenic	-	CG	ENSOARG00000007659
4	67414850	67414883	34	-0.487	Distal Intergenic	-	CG	ENSOARG00000008467
15	69792329	69792443	115	-0.487	Distal Intergenic	-	CG	ENSOARG00000010601
15	4089237	4089405	169	-0.487	Intron (ENSOART00000003570/ENSOARG00000003293, intron 3 of 6)	-	CG	ENSOARG00000016917
26	40356139	40356173	35	-0.487	Intron (ENSOART00000004838/ENSOARG00000004444, intron 3 of 8)	-	CG	ENSOARG00000004526
21	23507889	23507949	61	-0.487	Intron (ENSOART00000008626/ENSOARG00000007919, intron 10 of 12)	+	CG	ENSOARG00000007960
15	60669010	60669262	253	-0.487	Intron (ENSOART00000017488/ENSOARG00000016057, intron 9 of 9)	-	CG	ENSOARG00000016191
13	35991220	35991288	69	-0.487	Intron (ENSOART00000017499/ENSOARG00000016067, intron 6 of 7)	+	CG	ENSOARG00000016067
5	7773335	7773393	59	-0.486	Distal Intergenic	+	CG	ENSOARG00000004150
6	109711362	109711653	292	-0.486	Distal Intergenic	+	CG	ENSOARG00000008716
6	49598541	49598545	5	-0.486	Distal Intergenic	+	CG	ENSOARG00000009059
6	57691069	57691085	17	-0.486	Distal Intergenic	+	CG	ENSOARG00000010144
7	5807441	5807635	195	-0.486	Distal Intergenic	+	CG	ENSOARG00000011552
20	43439049	43439054	6	-0.486	Distal Intergenic	+	CG	ENSOARG00000014611
1	65254335	65254390	56	-0.486	Distal Intergenic	+	CG	ENSOARG00000014959
3	33961343	33961379	37	-0.486	Distal Intergenic	+	CG	ENSOARG00000019040
7	60547552	60547716	165	-0.486	Distal Intergenic	+	CG	ENSOARG00000021034
6	98761273	98761426	154	-0.486	Distal Intergenic	-	CG	ENSOARG00000003161
4	93688302	93688312	11	-0.486	Distal Intergenic	-	CG	ENSOARG00000004778
10	19633621	19633807	187	-0.486	Distal Intergenic	-	CG	ENSOARG00000008615
9	7948879	7949056	178	-0.486	Distal Intergenic	-	CG	ENSOARG00000012254
10	59647958	59647997	40	-0.486	Distal Intergenic	-	CG	ENSOARG00000017151
11	12966212	12966286	75	-0.486	Intron (ENSOART00000000182/ENSOARG00000000176, intron 11 of 12)	+	CG	ENSOARG00000000176
11	13569308	13569454	147	-0.486	Intron (ENSOART00000003627/ENSOARG00000003338, intron 2 of 8)	-	CG	ENSOARG00000003338
6	102602885	102602909	25	-0.486	Intron (ENSOART00000006355/ENSOARG00000005838, intron 4 of 11)	-	CG	ENSOARG00000005838
2	244845825	244845890	66	-0.486	Intron (ENSOART00000009752/ENSOARG00000008948, intron 13 of 16)	+	CG	ENSOARG00000009017
4	72030436	72030578	143	-0.486	Intron (ENSOART00000012126/ENSOARG00000011152, intron 1 of 6)	-	CG	ENSOARG00000011063
3	108659135	108659332	198	-0.486	Intron (ENSOART00000016015/ENSOARG00000014716, intron 15 of 18)	+	CG	ENSOARG00000016632
3	64107911	64107950	40	-0.485	Distal Intergenic	+	CG	ENSOARG00000001663
15	762571	762639	69	-0.485	Distal Intergenic	+	CG	ENSOARG00000001853
2	32618767	32618815	49	-0.485	Distal Intergenic	+	CG	ENSOARG00000003439
X	76208025	76208049	25	-0.485	Distal Intergenic	+	CG	ENSOARG00000003768
23	19141043	19141246	204	-0.485	Distal Intergenic	+	CG	ENSOARG00000005276
9	91746430	91746465	36	-0.485	Distal Intergenic	+	CG	ENSOARG00000014715
3	179537545	179537666	122	-0.485	Distal Intergenic	+	CG	ENSOARG00000018703
3	190532977	190532993	17	-0.485	Distal Intergenic	+	CG	ENSOARG00000020110
3	191419755	191419978	224	-0.485	Distal Intergenic	+	CG	ENSOARG00000020110
11	58323763	58323994	232	-0.485	Distal Intergenic	-	CG	ENSOARG00000013779
13	54702216	54702465	250	-0.485	Distal Intergenic	-	CG	ENSOARG00000015131
1	272599665	272599680	16	-0.485	Distal Intergenic	-	CG	ENSOARG00000015558
10	65391238	65391273	36	-0.485	Distal Intergenic	-	CG	ENSOARG00000017184
3	60919483	60919537	55	-0.485	Distal Intergenic	-	CG	ENSOARG00000020937
23	22546800	22546925	126	-0.485	Intron (ENSOART00000006313/ENSOARG00000005795, intron 19 of 19)	+	CG	ENSOARG00000003832
X	12930609	12930619	11	-0.485	Intron (ENSOART00000013220/ENSOARG00000012151, intron 7 of 8)	-	CG	ENSOARG00000012151
[truncated: 69,362 more rows]
[truncated: 1 more columns]
